# Supplementary material
Source: MDPI journal article supplement (https://www.mdpi.com/2571-6131/6/4/134)

## **Supplementary Materials**

# **Non-invasive on-site classification and dating of ancient ceramics through pXRF and Raman analysis of marks, glaze and overglaze. Application to 18th and 19th century Meissen porcelain (Saxony) and comparison with Chinese porcelain**

Philippe Colomban<sup>1</sup>, Gulsu Simsek Franci<sup>2</sup>, Mareike Gerken<sup>3</sup>, Michele Gironda<sup>3</sup>, Viviane Mesqui<sup>4</sup>

<sup>1</sup> Sorbonne Université, CNRS, MONARIS UMR8233, 4 Place Jussieu, 75005 Paris, France

<sup>2</sup> Koç University Surface Science and Technology Center (KUYTAM), Rumelifeneri Yolu, Sariyer 34450 Istanbul, Türkiye

<sup>3</sup> Bruker Nano Analytics, Am Studio 2D, 12489 Berlin, Germany

<sup>4</sup> Cité de la Céramique, Grande Rue, 92310 Sèvres, France

**Table S1** : Analyzed artefacts : date of production and acquisition (MNR: *Musées Nationaux Récupération*, <https://www.culture.gouv.fr/Nous-connaître/Organisation-du-ministère/Le-secretariat-général/Mission-de-recherche-et-de-restitution-des-biens-culturels-spoliés-entre-1933-et-1945/Biens-Musees-Nationaux-Recuperation-MNR>); (in red, Raman study only)

| Inventory number<br>(Type)                                   | Period<br>(expected)                               | View                                                                                | Size (cm)<br>Lxl;H | Origin<br>(Date of acquisition)          |
|--------------------------------------------------------------|----------------------------------------------------|-------------------------------------------------------------------------------------|--------------------|------------------------------------------|
| MNC 2274.38<br>(Figure)                                      | 1709-1730                                          |    | 8.7x8.8;14         | Dresden museum coll.<br>(exchange, 1837) |
| MNC 469.11.1<br>(tea cup)                                    | ca. 1720-1725                                      |    | 10x8;7             | (purchase, 1807)                         |
| MNC 8160.2<br>(dish)                                         | ca. 1720                                           |   | 12x12;2.7          | Lugel-Dolfus coll.<br>(gift, 1882)       |
| MNC 2274.9<br>(bowl)                                         | 1726 (mark)                                        |  | 12x6               | Dresden museum coll.<br>(exchange, 1837) |
| MSCR XXXXV<br>(Imari-style dish)                             | ca. 1730                                           |  | 22x22;3            | MNR<br>(1949)                            |
| MCSR LXXIX<br>(large tureen)                                 | ca. 1720-1730                                      |  | 20.4;7.3           | MNR<br>(1949)                            |
| MNC 19014<br>(coffee cup with arm coat of France and Poland) | 1737<br>Gift from August IIIrd to Marie Leszcynska |  | 6;5.3              | Armand Wittekind coll.<br>(1936)         |
| MSCR LVII.1<br>(coffee cup with Watteau-like décor)          | ca. 1745                                           |  | 6;8.8              | MNR<br>(1949)                            |
| MNC 8322                                                     | ca. 1740-1760                                      |  | 24.4x11.3;10.3     | Villaire coll.<br>(purchase 1884)        |

|                                                |                                                                                                           |                                                                                     |              |                                                                                         |
|------------------------------------------------|-----------------------------------------------------------------------------------------------------------|-------------------------------------------------------------------------------------|--------------|-----------------------------------------------------------------------------------------|
| MNC 23181<br>(Louis XV<br>figure)              | 1746<br>(wedding of<br>France<br>Dauphin and<br>M.-J. de Saxe)                                            |    | 13x15;16.2   | Anne-Jules<br>Noailles coll<br>(gift, 1963)                                             |
| MNC 11205<br>(Bacchus &<br>bacchante<br>group) | Käendler<br>period<br>ca. 1760                                                                            |    | 25x19.5;27.2 | Eléonor<br>Dècle coll.<br>(gift 1902)                                                   |
| MNC 2274.20<br>(butter cup)                    | 18 <sup>th</sup> c.?<br> |    | 13x13.5;7    | Dresden<br>museum<br>coll.<br>(exchange,<br>1837)<br>W mark<br>Cluny<br>museum<br>coll. |
| MNC 19032.2<br>(mustard<br>cup)                | 18 <sup>th</sup> c.                                                                                       |   | 9.3;7.7      |                                                                                         |
| MNC 14229.1<br>(chocolate<br>pot)              | 18 <sup>th</sup> c.                                                                                       |  | 13x7;9.7     | Antoine-<br>Gaston de<br>Grollier coll.<br>(bequest<br>1908)                            |
| MNC 11213.2<br>(coffee cup)                    | 18th c.                                                                                                   |  | 7.7x6;3.7    | Eléonor<br>Dècle coll.<br>(gift 1902)                                                   |
| MNC 14234<br>(orange cup)                      | 18th c. ?<br>          |  | 8.4x8.4;10   | Antoine-<br>Gaston de<br>Grollier coll.<br>(bequest<br>1908)                            |
| MNC 11051.2<br>(boy figure)                    | 18th c. ?                                                                                                 |  | 5.4x4.7;12.2 | Eléonor<br>Dècle coll.<br>(gift 1902)                                                   |

|                                                                            |                                             |                                                                                     |                |                                                              |
|----------------------------------------------------------------------------|---------------------------------------------|-------------------------------------------------------------------------------------|----------------|--------------------------------------------------------------|
| MNC 11064<br>(Three<br>geometer<br>and<br>astronomer<br>children<br>group) | 18th c.?                                    |    | 9.4x8.8;12.2   | Eléonor<br>Dècle coll.<br>(gift 1902)                        |
| MNC 19944<br>(singing<br>angel)                                            | 18th c.                                     |    | 4.6x4.1;8.3    | Cluny<br>museum<br>coll.<br>(1938)                           |
| MNC 9638<br>(bowl)                                                         | 18th c.                                     |    | 21.8x21.8;10.3 | Tamelier<br>coll.<br>(purchase<br>1894)                      |
| MNC 14201<br>(teapot)                                                      | 18th c.                                     |   | 9.4;9.4        | Antoine-<br>Gaston de<br>Grollier coll.<br>(bequest<br>1908) |
| MNC 23298.1<br>(cup for<br>Turkish<br>market)                              | ca. 1774-1814                               |  | 12x12;10       | Joseph<br>Soustiel coll.<br>(gift 1967)                      |
| MNC 469.9.1<br>(coffee cup<br>with painting<br>copy)                       | c.a. 1774-<br>1814<br>(Marcolini<br>period) |  | 9x6.7;10.5     |                                                              |
| MNC 886.4.1<br>(coffee cup)                                                | End of 18th-<br>beginning of<br>19th c.?    |  | 9x6.5;6.5      |                                                              |
| MNC 469.5.1<br>(coffee cup)                                                | ?                                           |  | 8.5x6.5;6.3    |                                                              |
| MNC 25340<br>(figure)                                                      | 19th c.                                     |  | 13.7x9.3;15.5  | Cellier coll.<br>(bequest<br>1986)                           |



|                     |      |                                                                                   |               |                        |
|---------------------|------|-----------------------------------------------------------------------------------|---------------|------------------------|
| MNC 886.3           | 1825 |  | 24.5x24.5;3.2 | M. Kühn gift<br>(1825) |
| MNC 2247.10<br>dish |      |  |               | 1836                   |

**Figure S1:** As-recorded Raman and pXRF spectra of artifacts

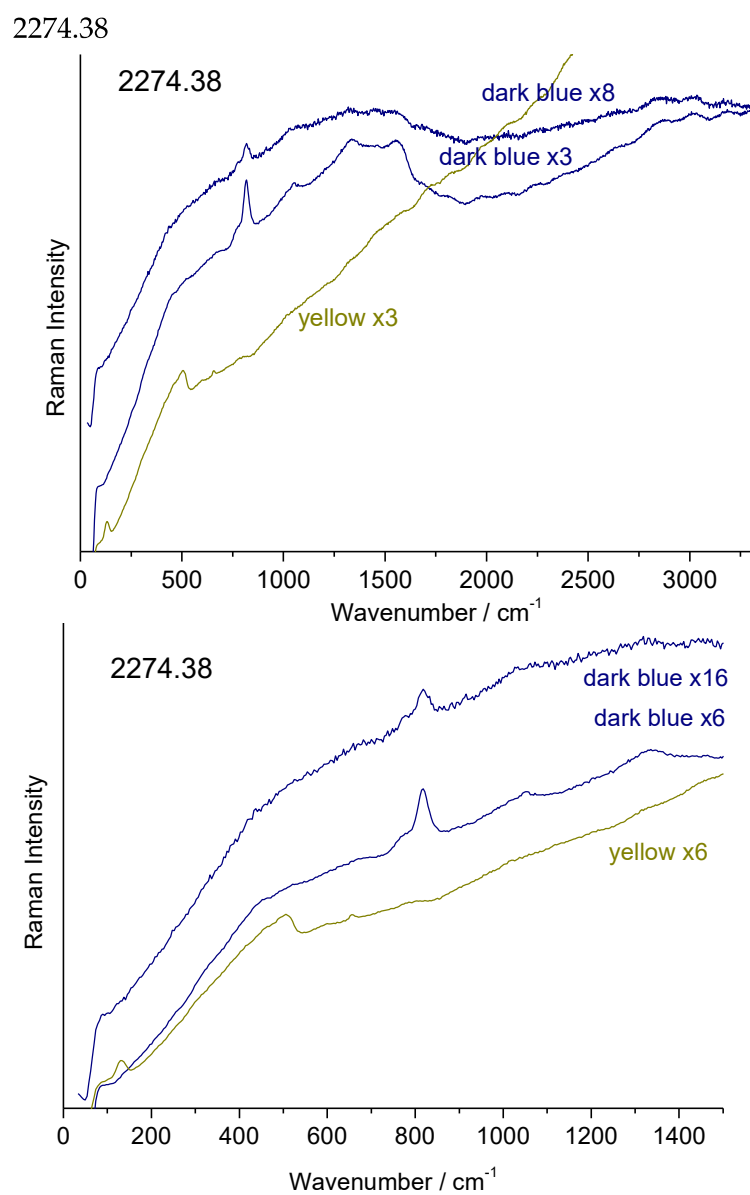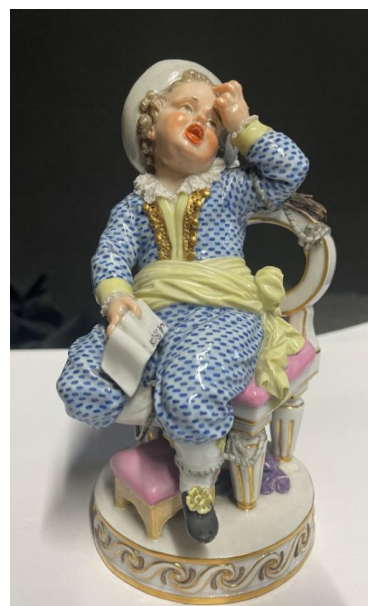

Exchange in 1837 with  
Dresden museum  
1709-1730

MNC 2274.38  
Figure  
shape 1709  
Pdf?

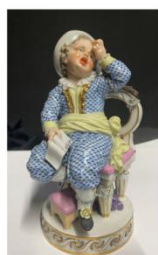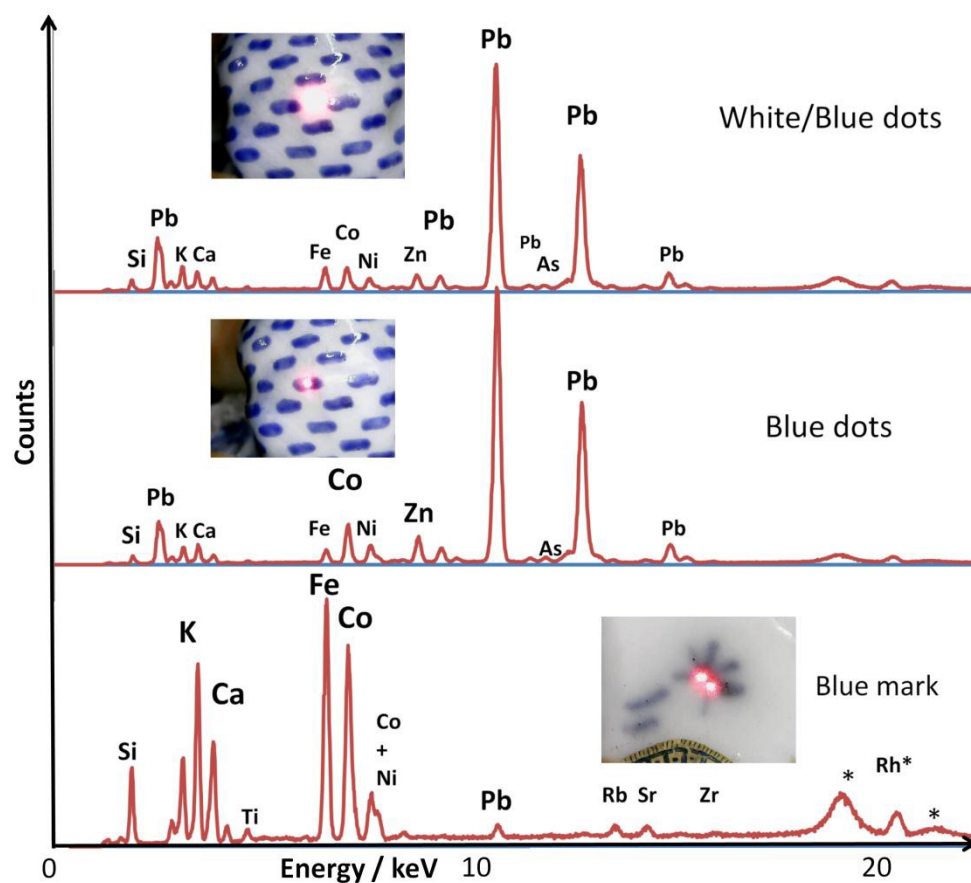

MNC 2274.38  
Figure  
shape 1709

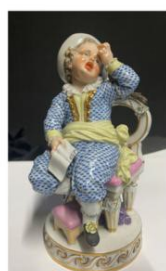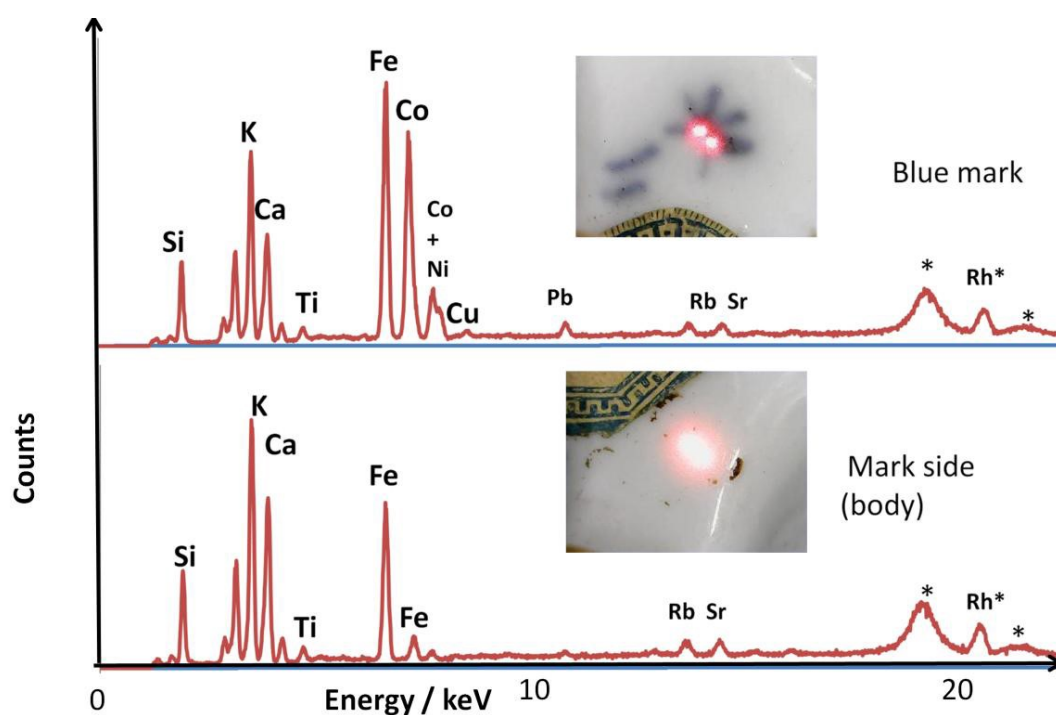

MNC 2274.38

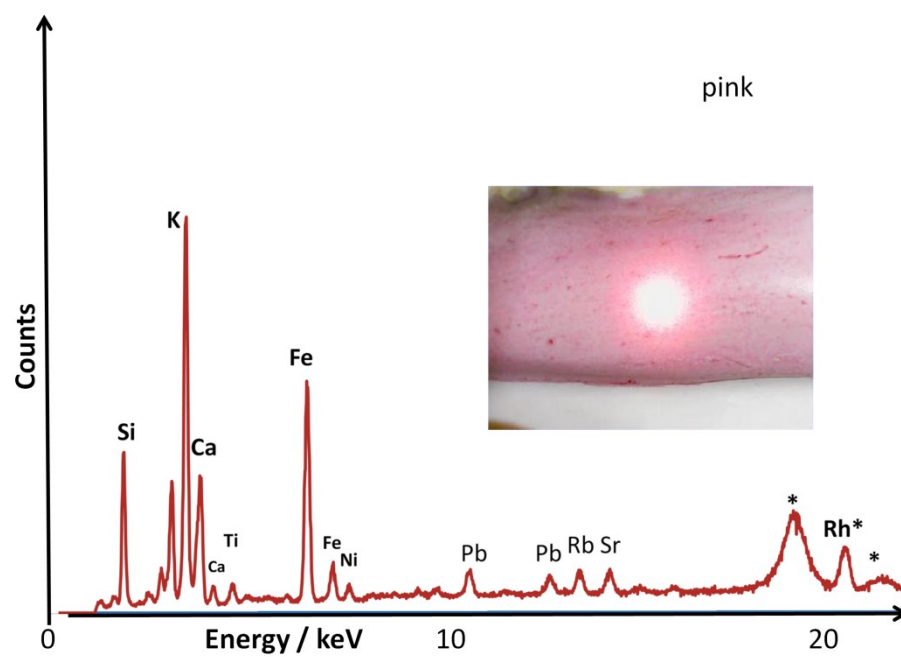

Co-Ni-Cu

MSCR XXXXV assiette (base MNR, Office de  
Récupération des Biens Privés, 1949)

22x22 H3

c.a. 1730, Imari

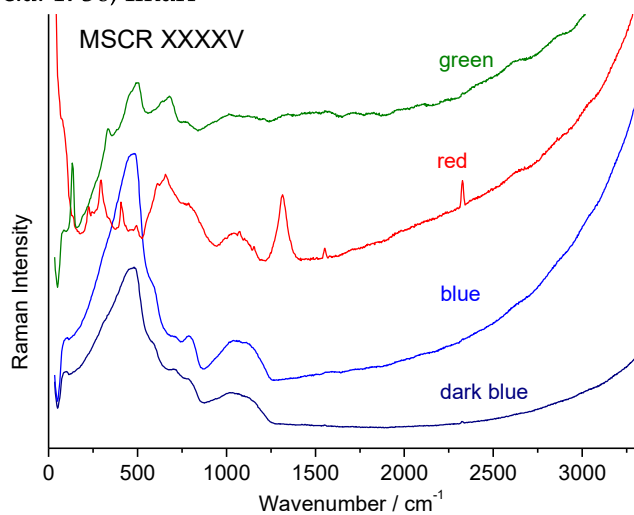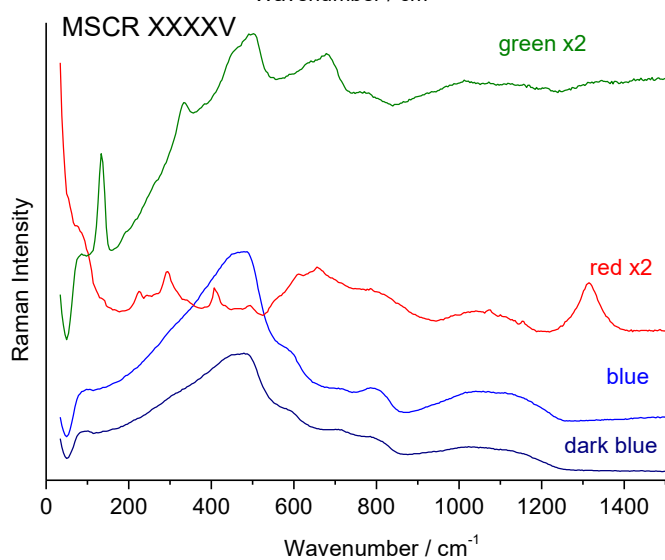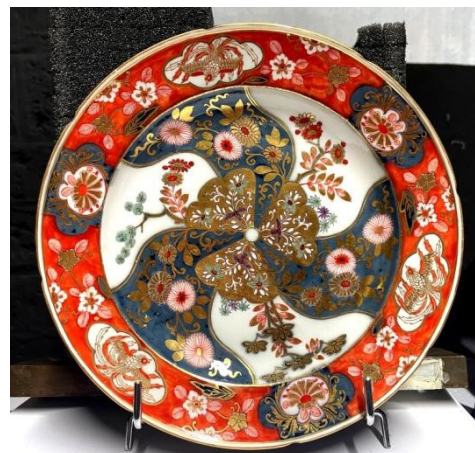

MCSR XXXXV  
(Imari style dish)  
1730

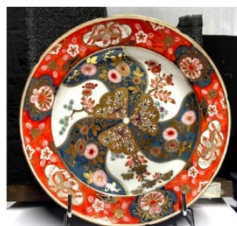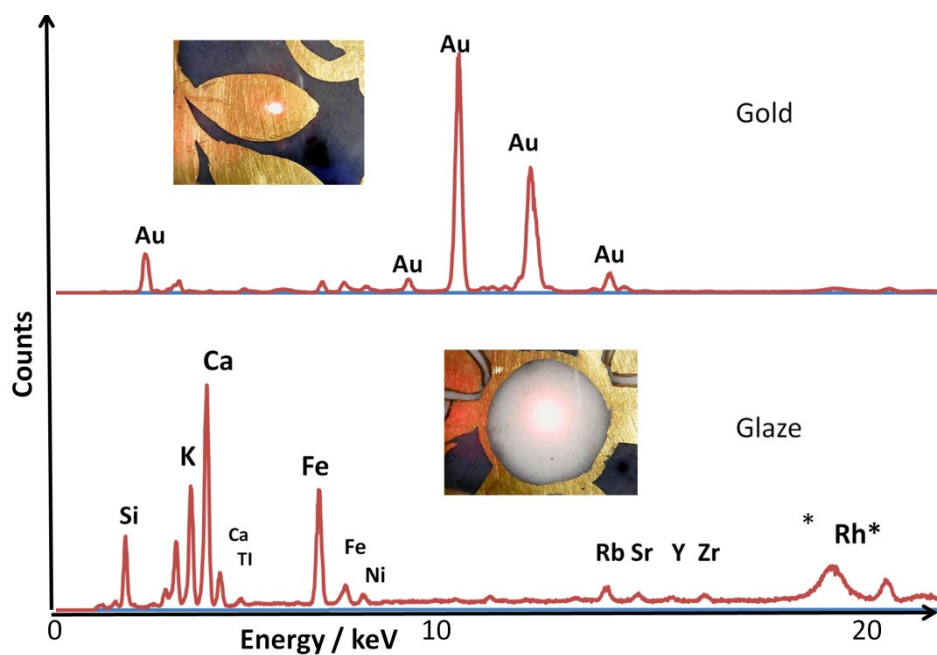

MCSR XXXXV  
(Imari style dish)  
1730

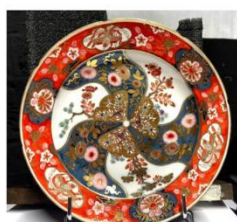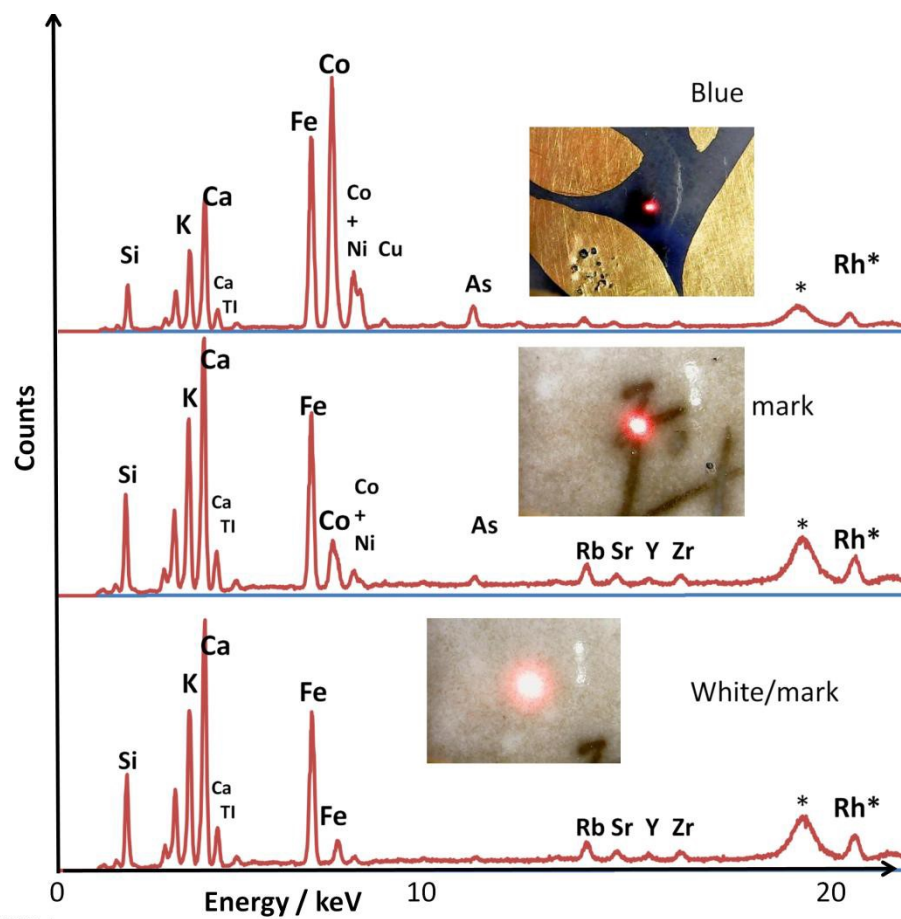

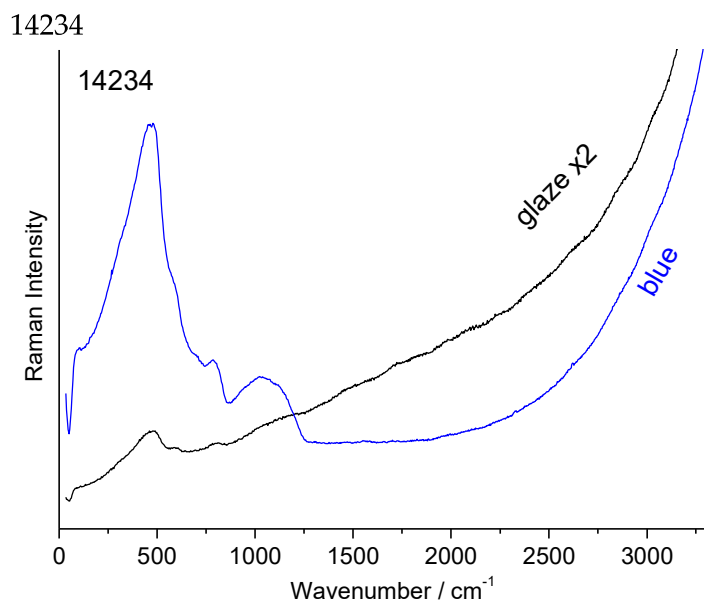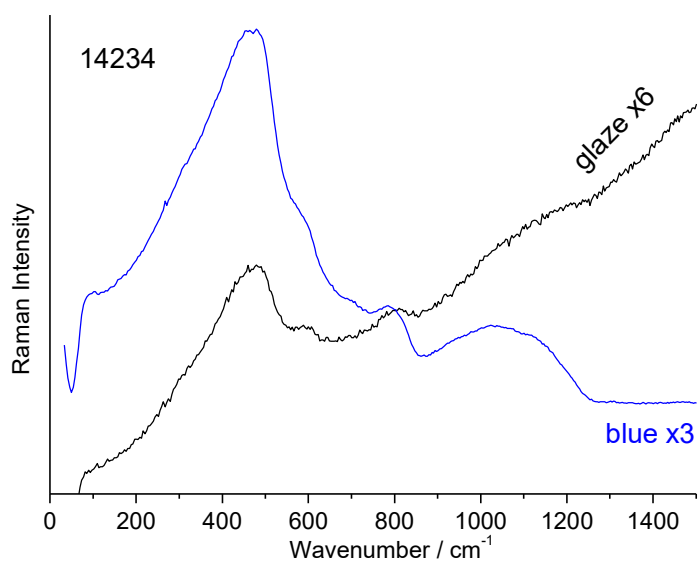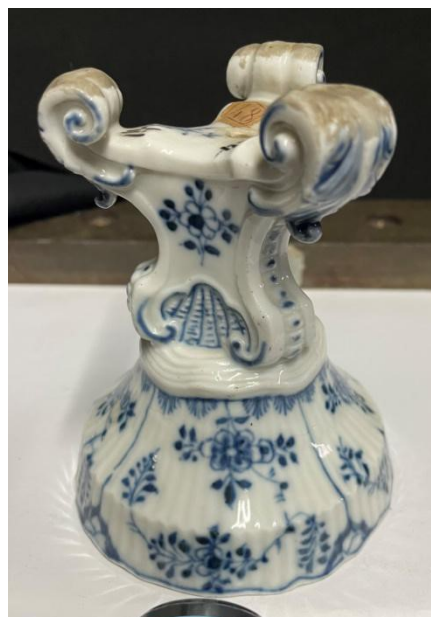

Antoine Gaston de Grollier bequest  
(1908)  
8.4x8.4 h10  
Orange cup  
18th century?



MNC 14234  
(orange cup)

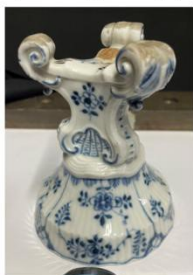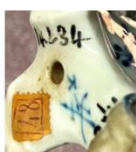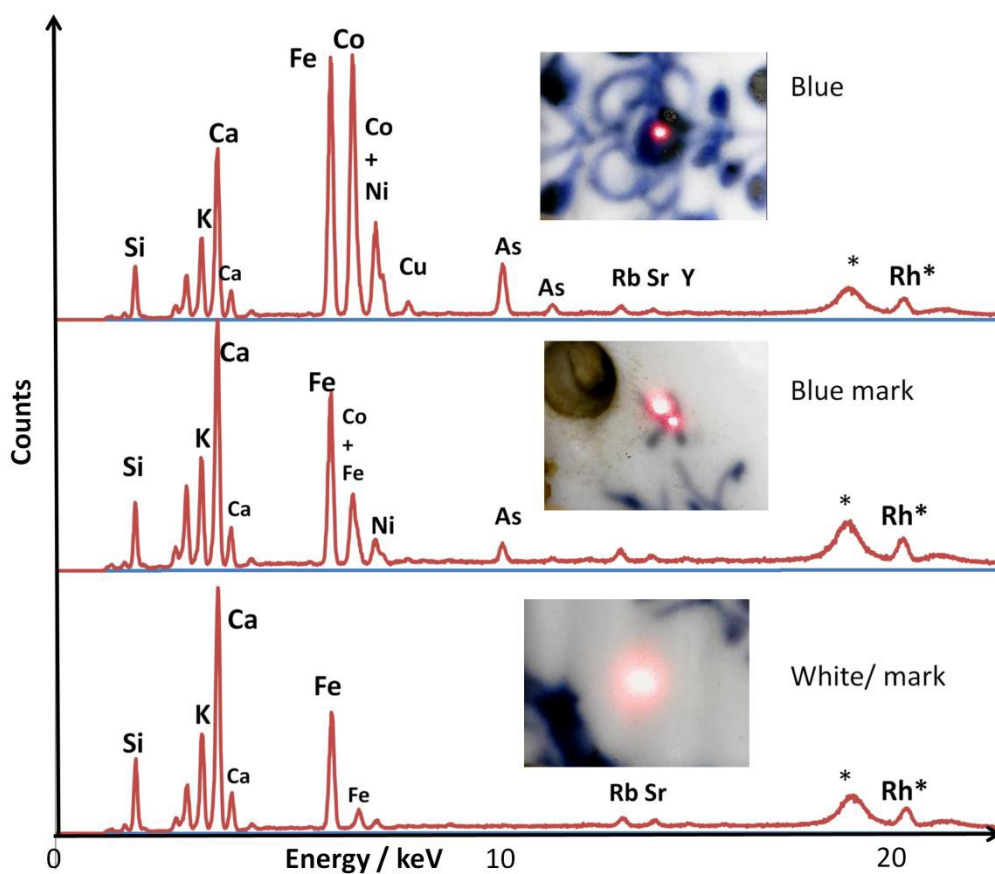

MNC 2274.2 (wrongly labelled 2274.9)

1726

In Porcelaine de Saxe, Exhibition Catalogue , 1952, item N°131

MNC 2274.9

Green

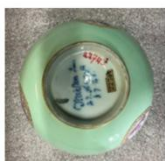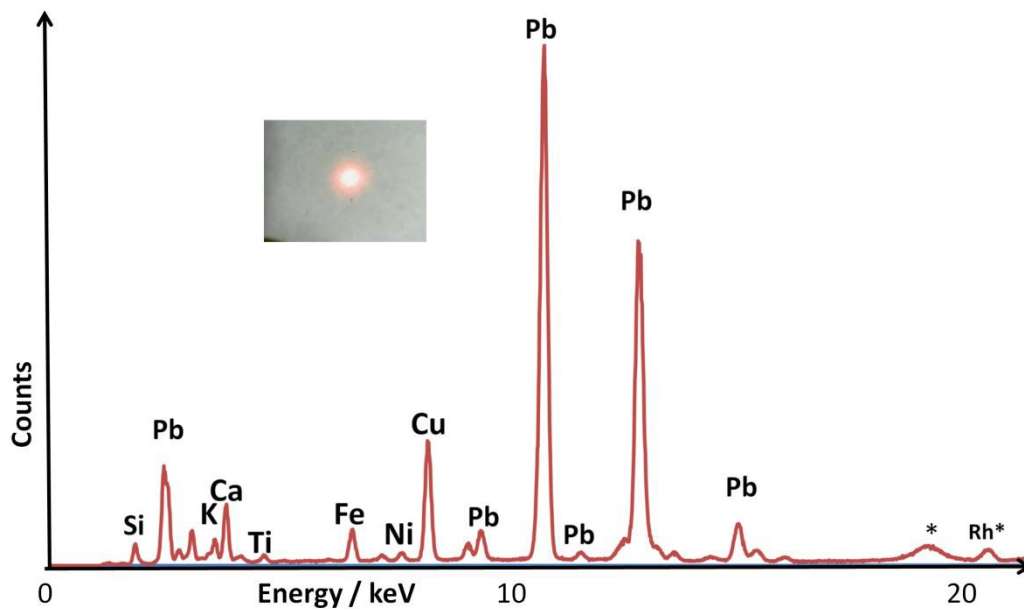

MNC 2274.9

(bowl)  
1726

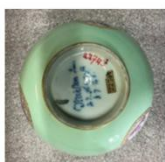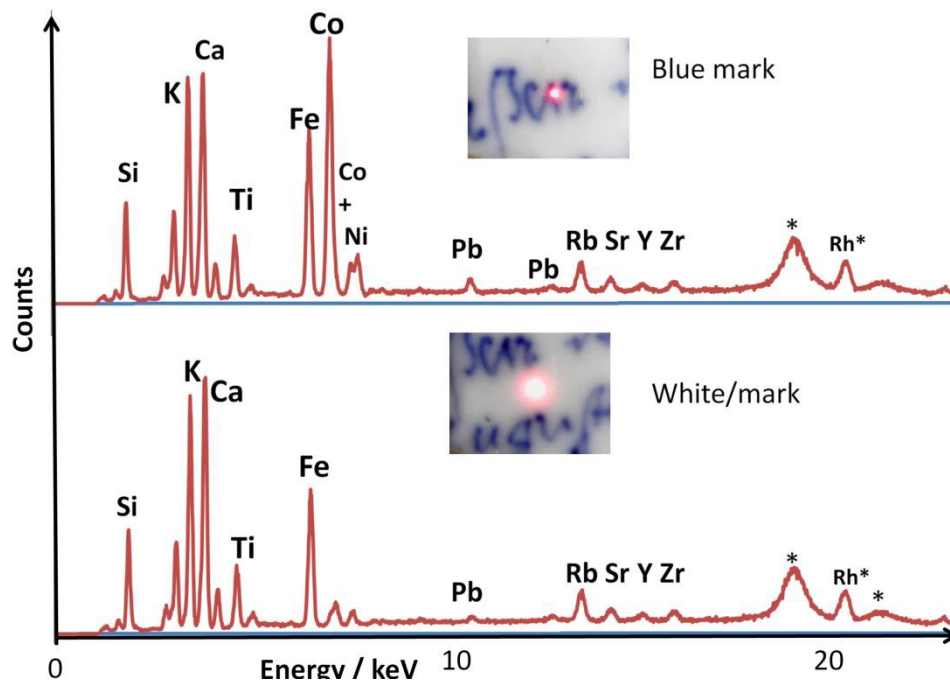

(bowl)  
1726

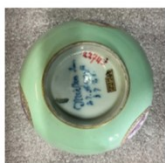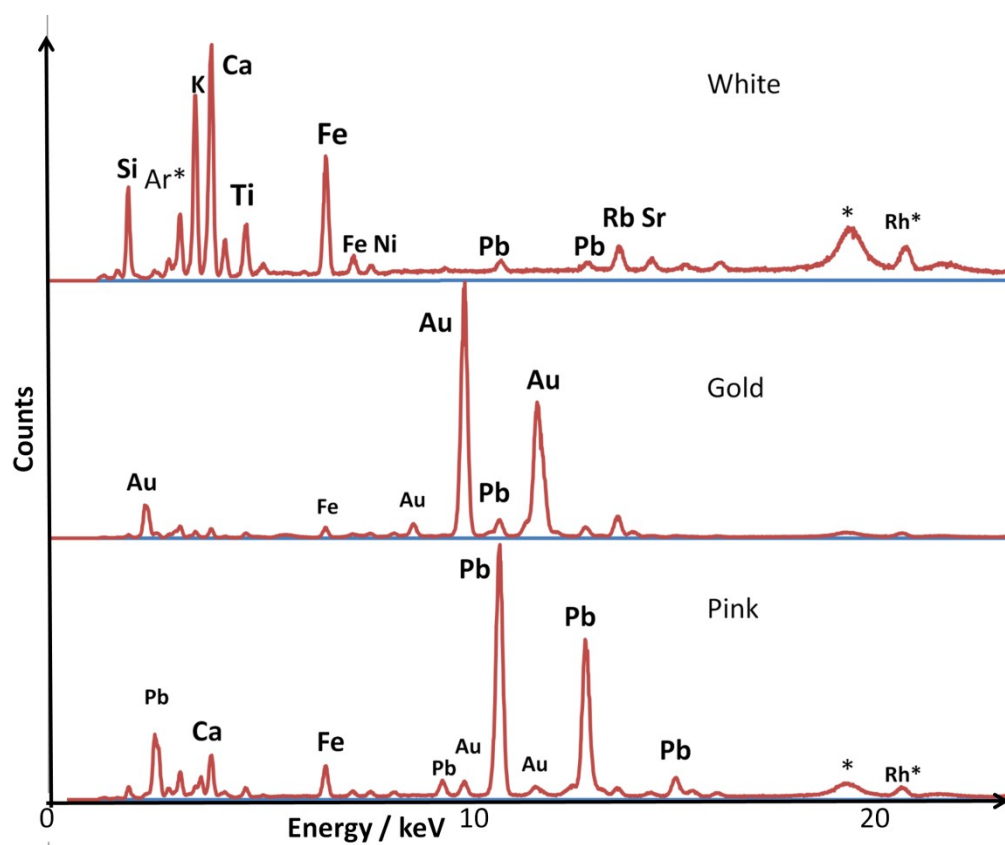

19014

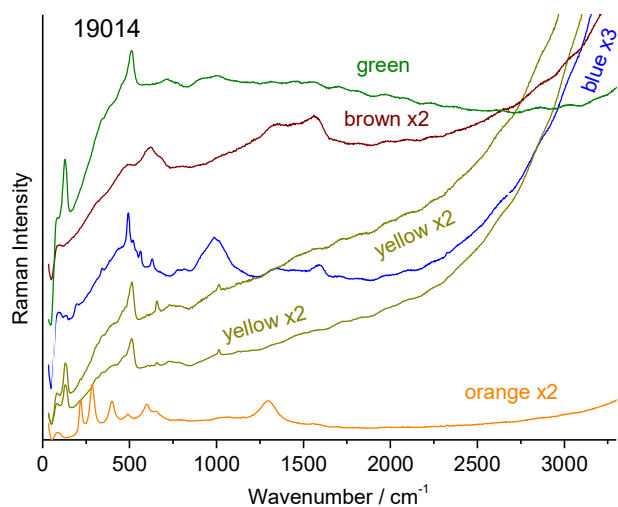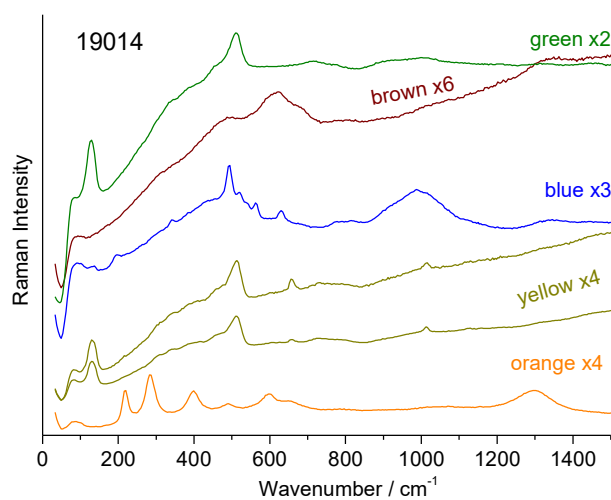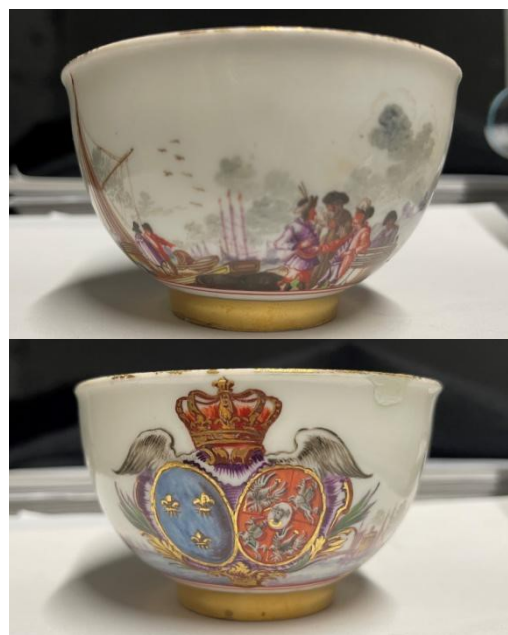

H5.3

Armes de France & Pologne

France & Poland Arm Coat

Service offert par / offered by Auguste III

à/to Marie Leszcynska en 1737

Donnated by Armand Wittekind in 1936

MNC 19014  
(coffee cup  
with arm coat  
of France and  
Poland)

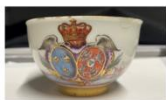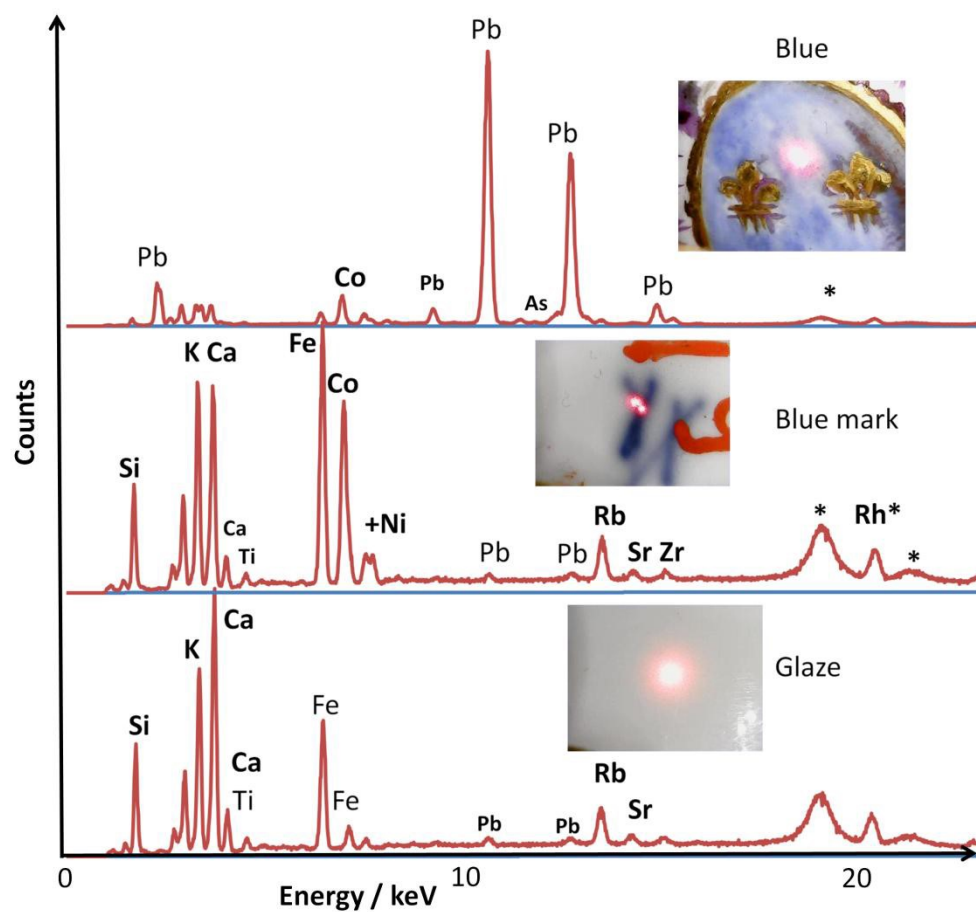

MNC 19014  
(coffee cup  
with arm coat  
of France and  
Poland)

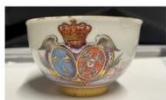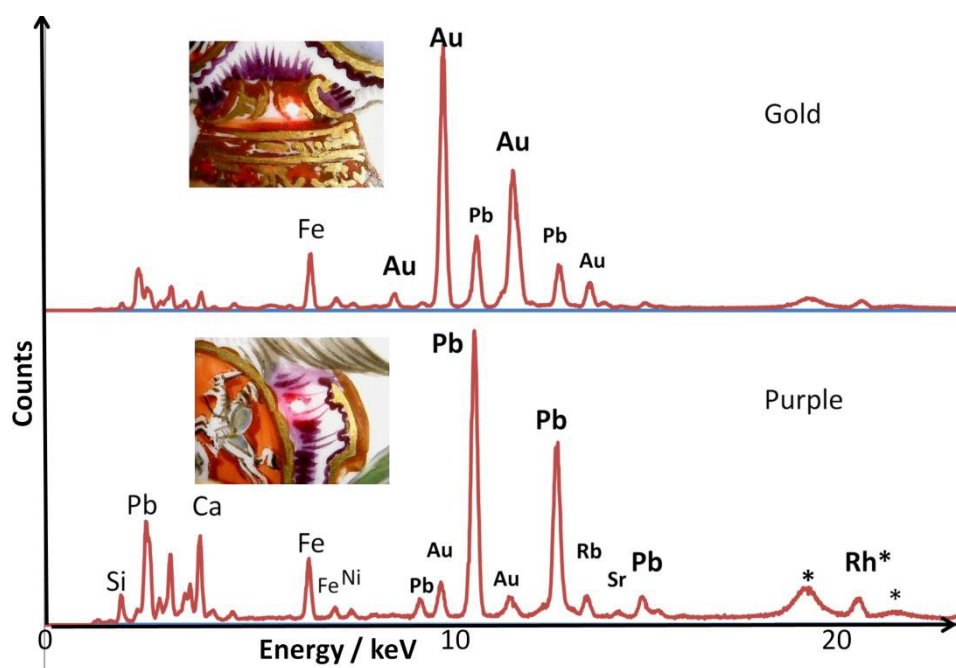

8322

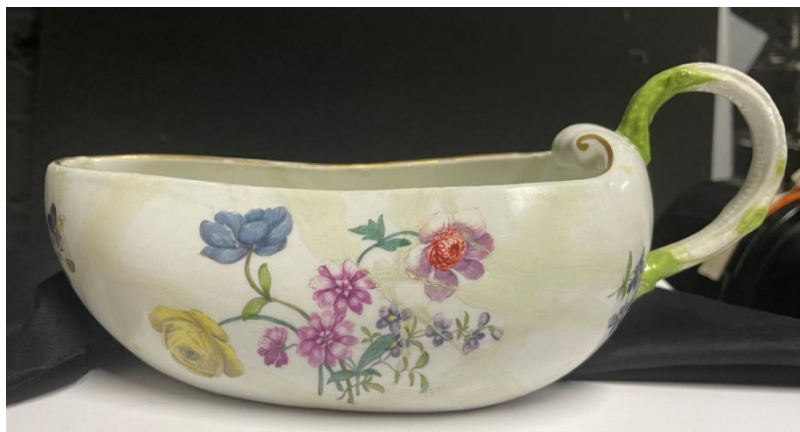

c.a. 1740-1760

24.4x11.3 h10.3 acquisition : 1884 (Villaire)

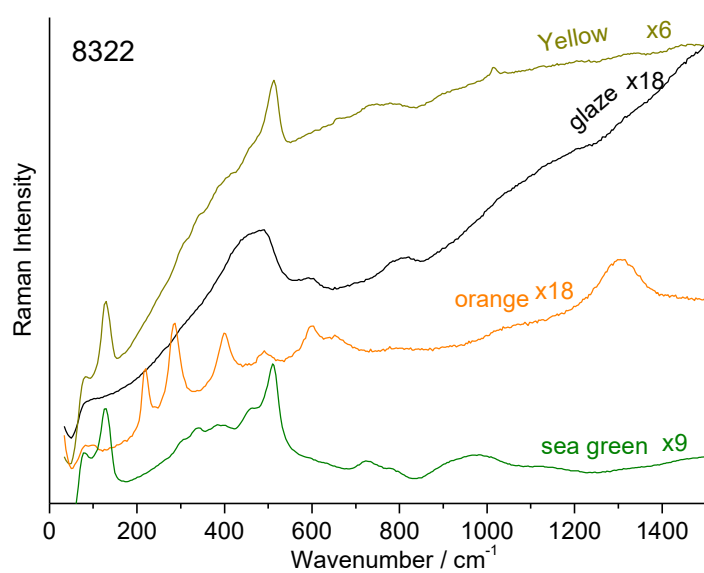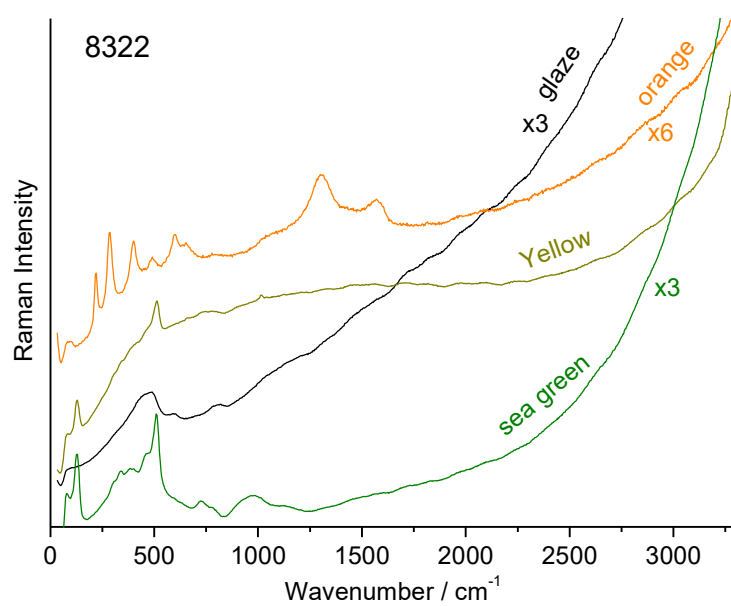

MNC 8322  
1740-60  
Bourdalous

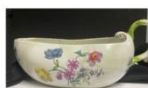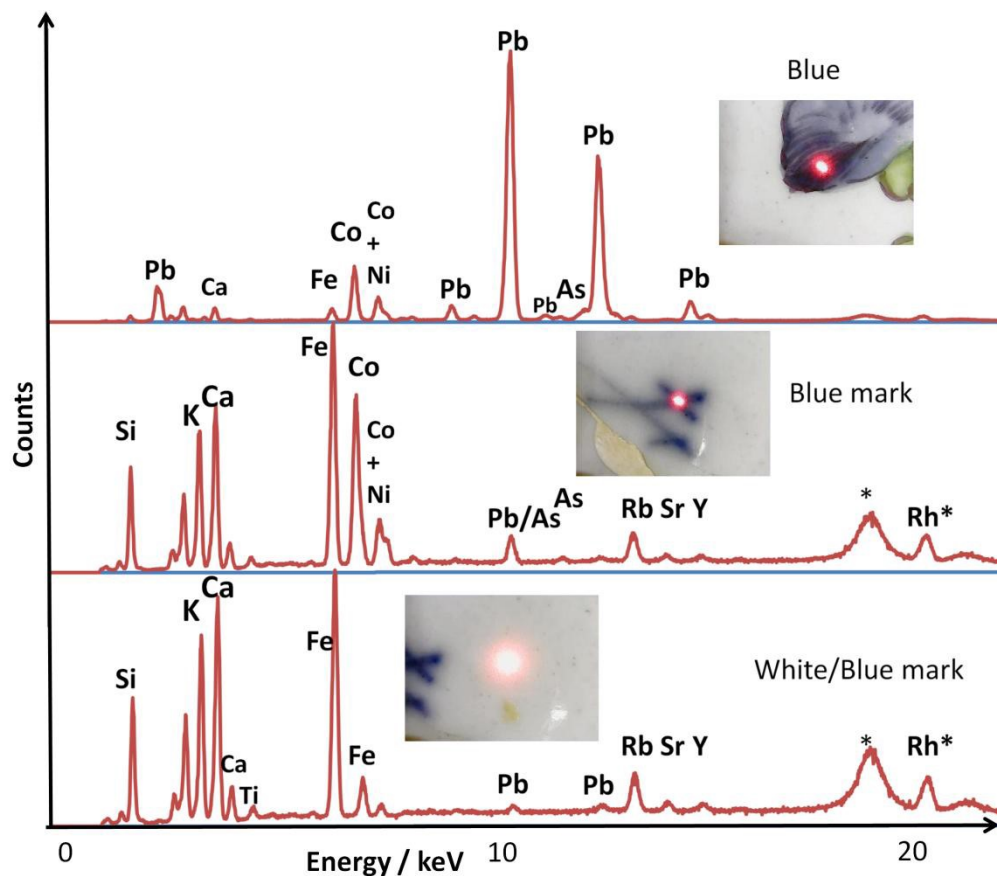

MNC 8322  
1740-60  
Bourdalous

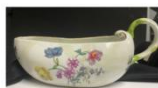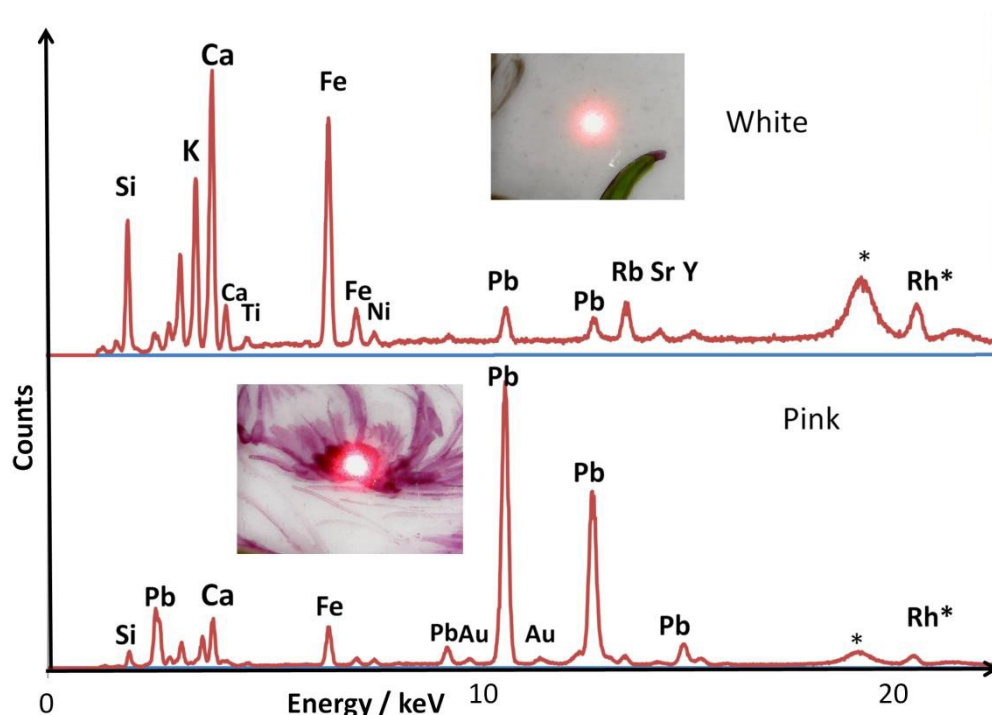



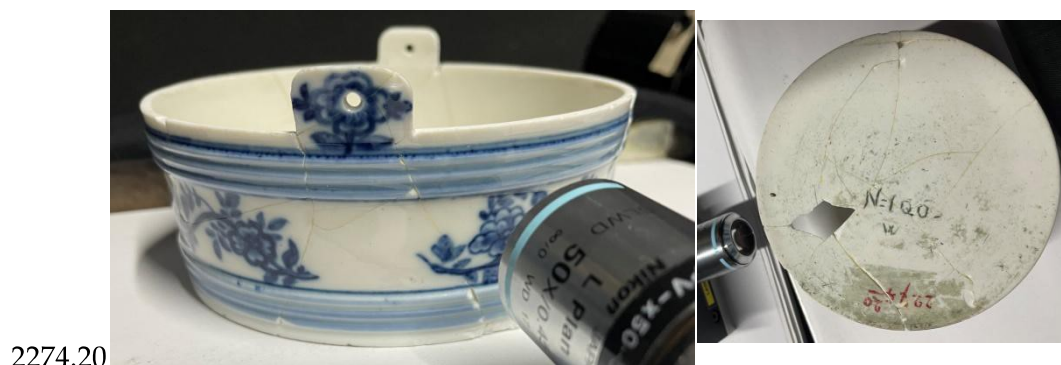

2274.20

Butter cup,  
c.a. 1730  
exchange, with Dresden museum 1837

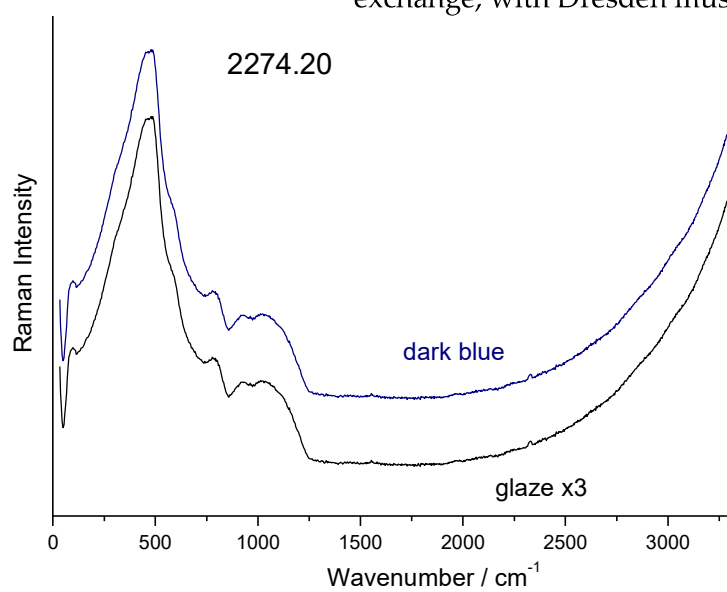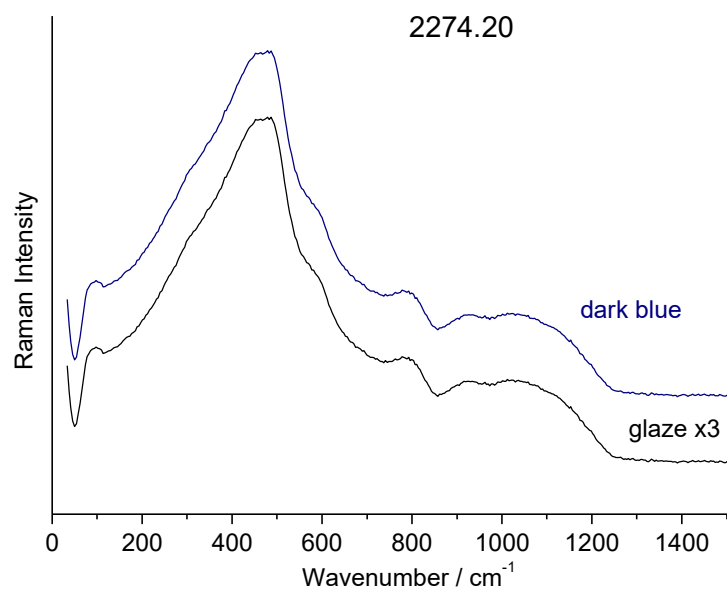

MNC 2274.20  
(butter cup)  
Augustus mark  
18<sup>th</sup> c.

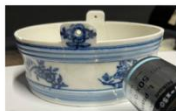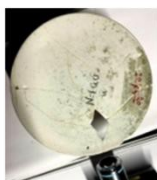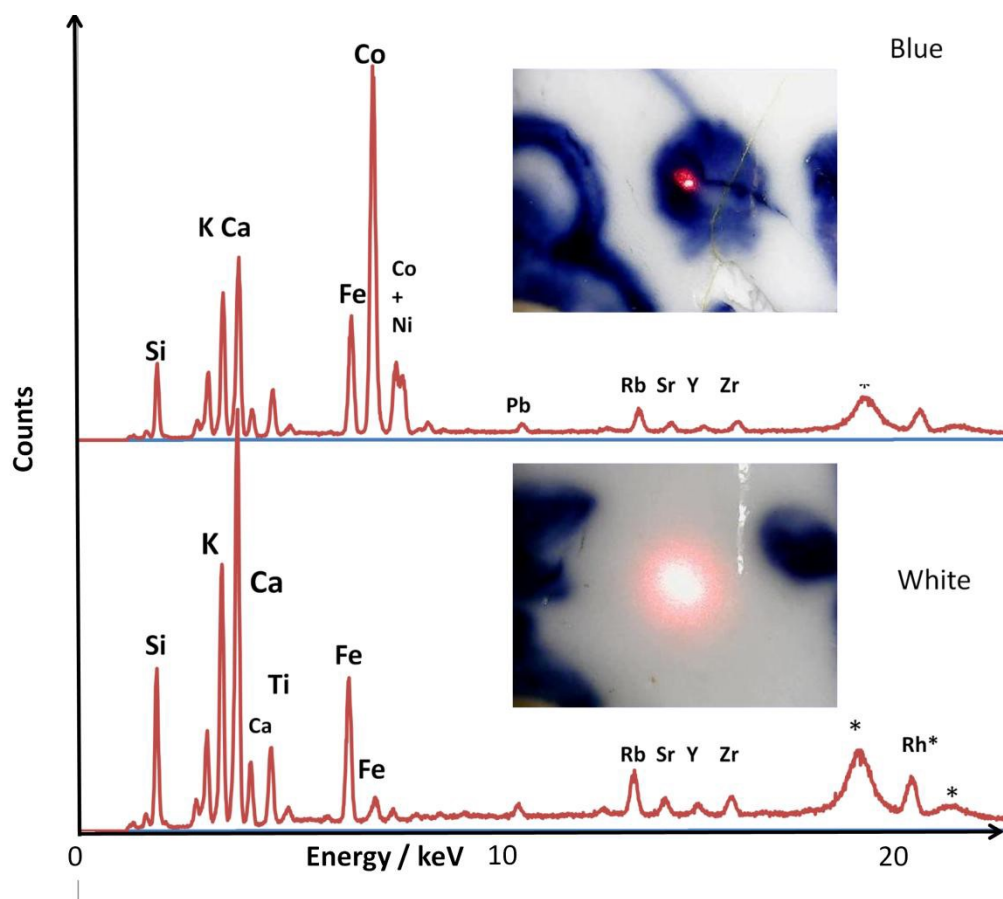

MNC 19032.2

9.3 H7.7

18<sup>th</sup> c. (formerly, collection of Musée de Cluny)

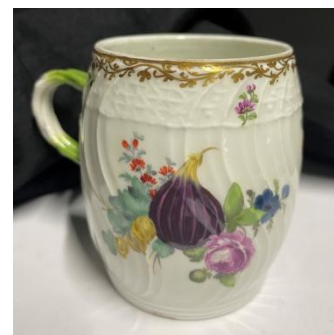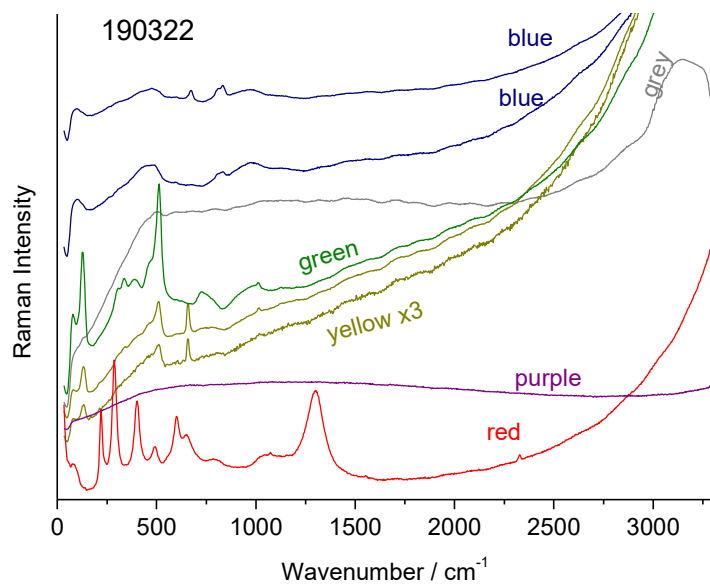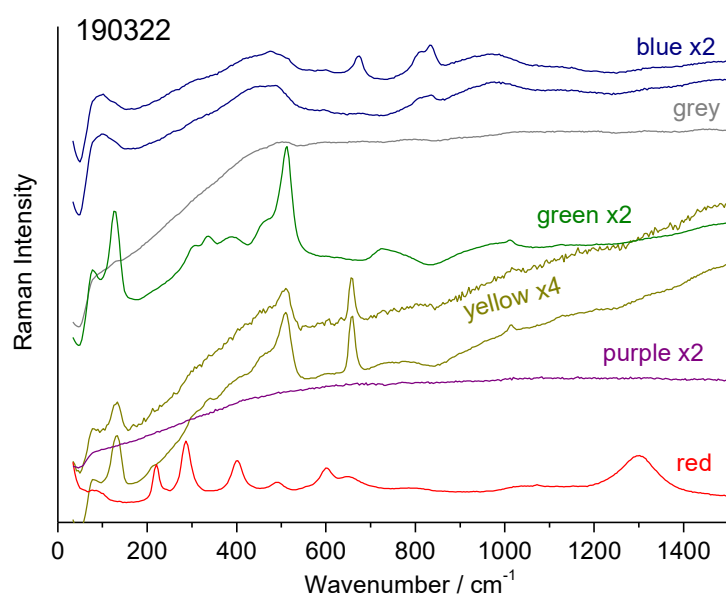

MNC 19032.2  
(mustard cup)  
18<sup>th</sup> c.

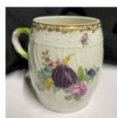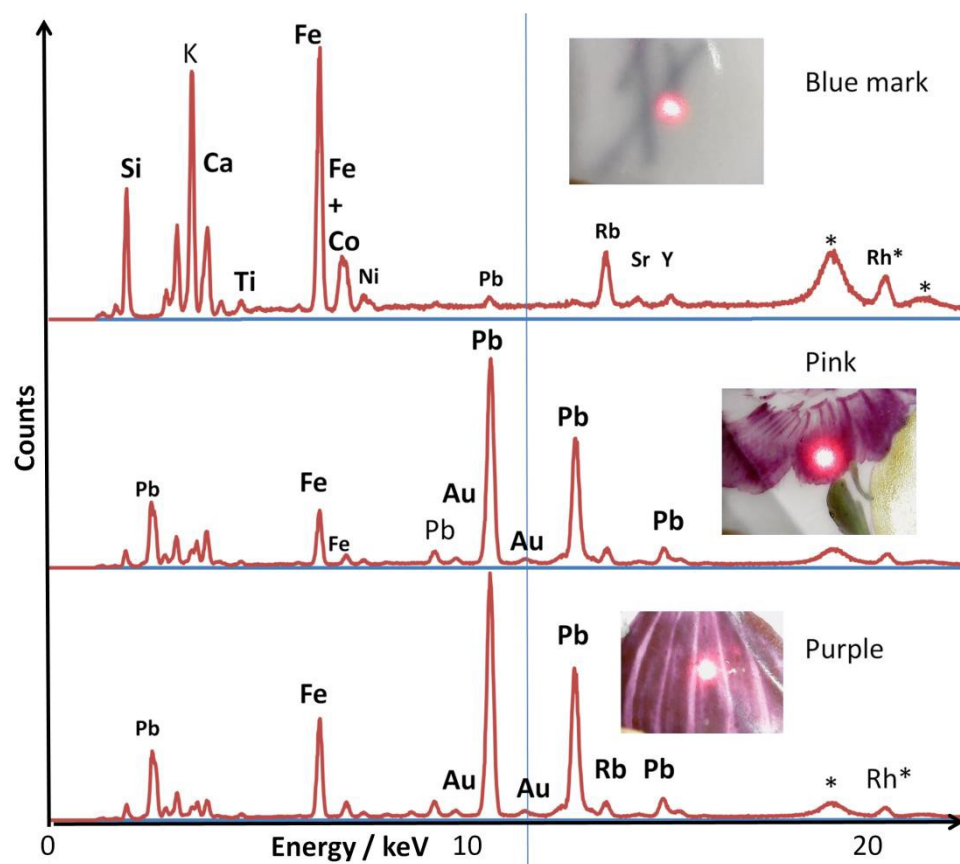

MNC 19032.2  
(mustard cup)  
18<sup>th</sup> c.

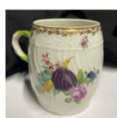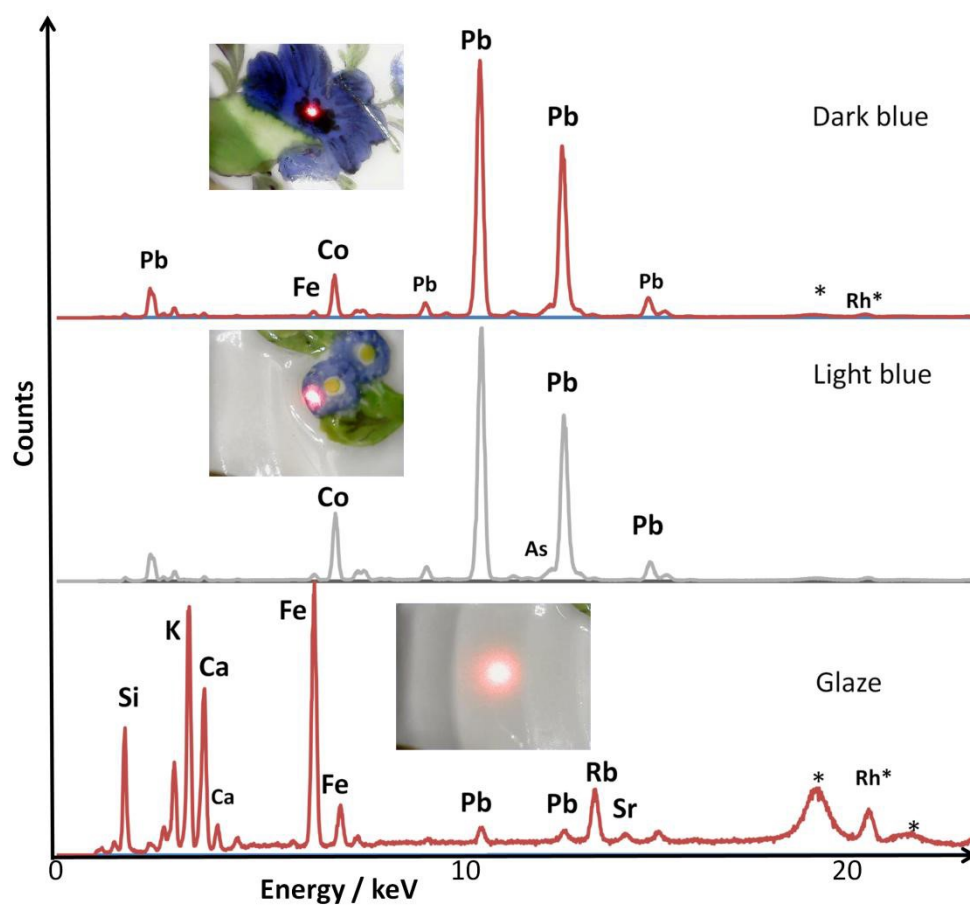

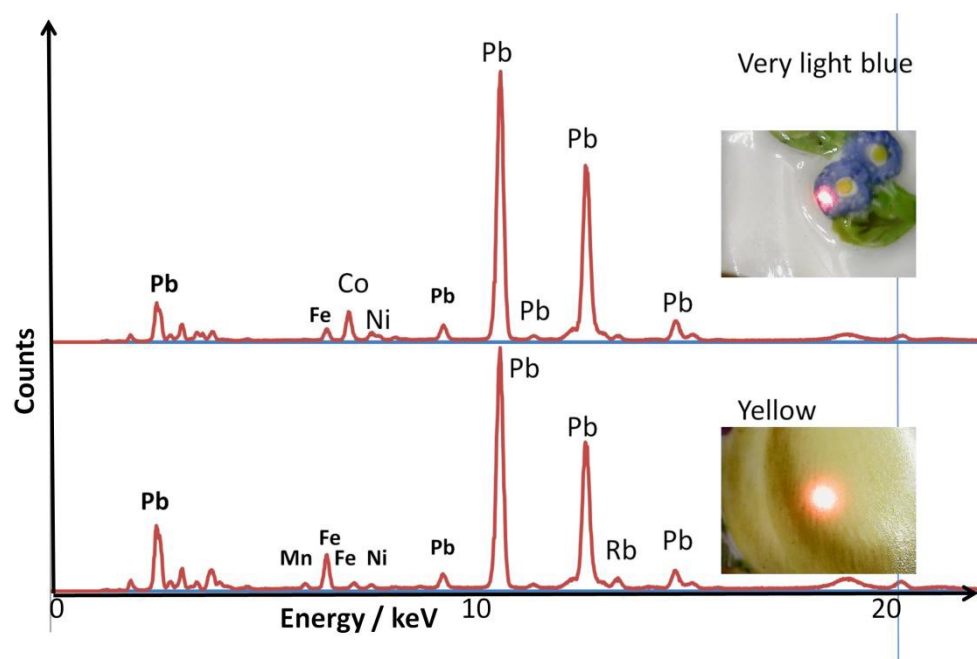

MNC 14229 1

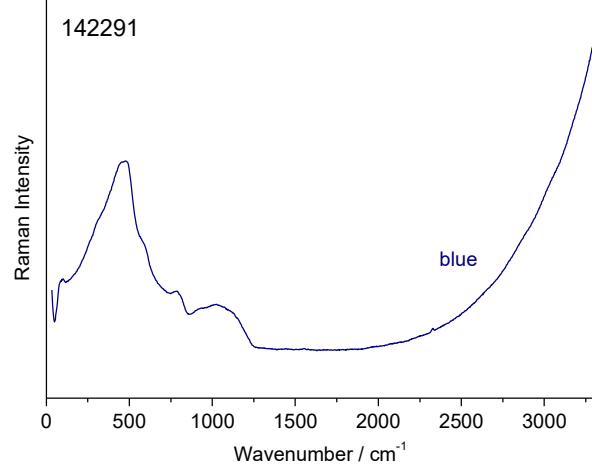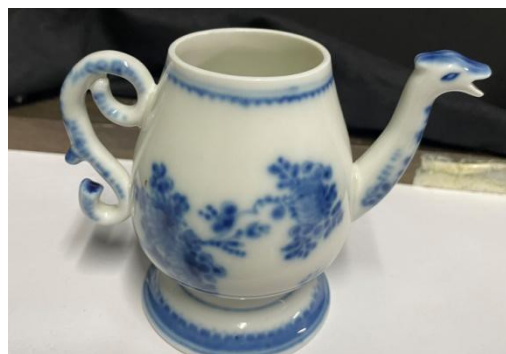

Chocolate pot

18th c.

Antoine-Gaston Grollier bequest (1908)

13x7.4 H9.7 (+ couvercle)

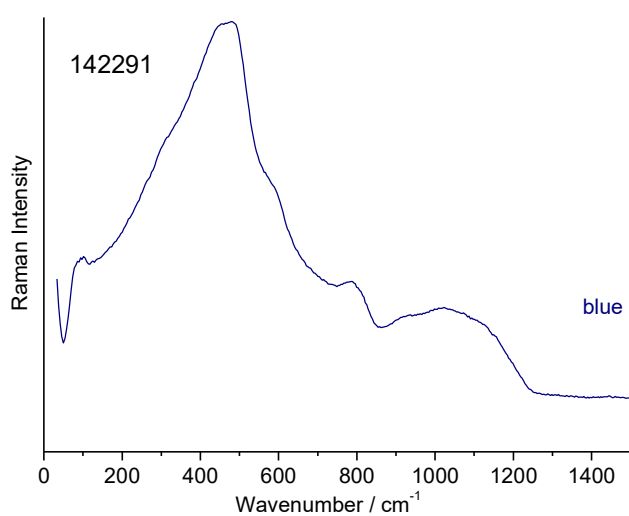

14229.1  
Chocolate pot

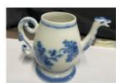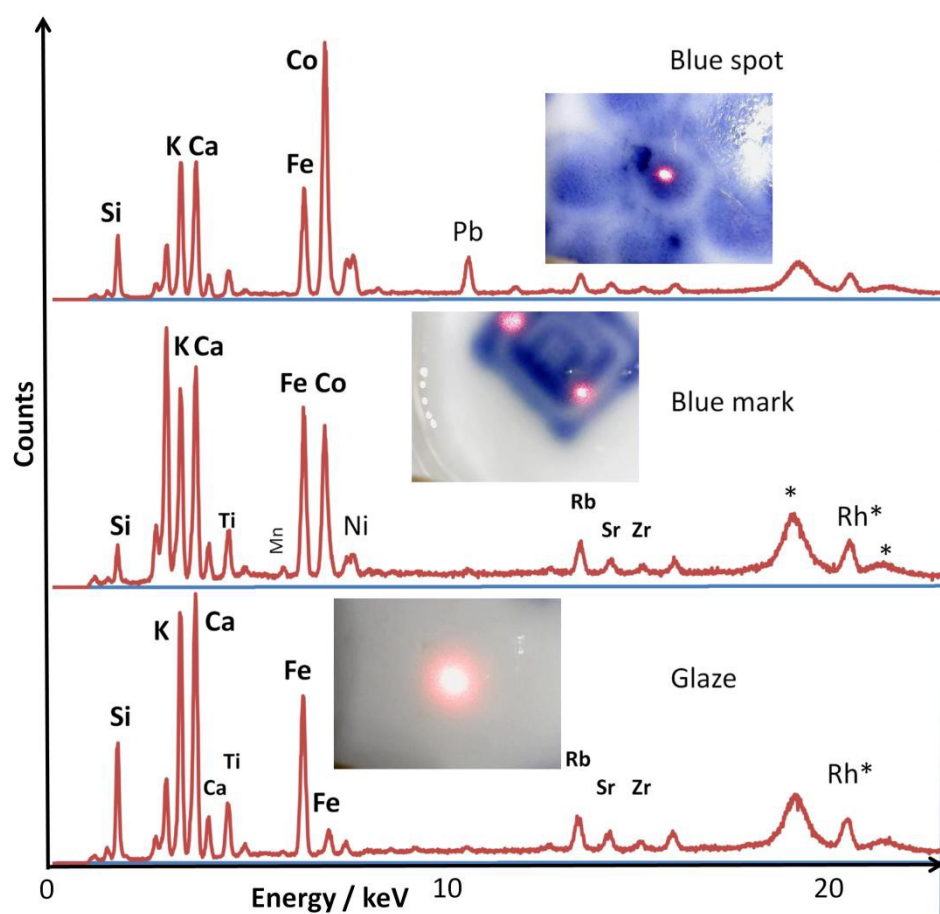

b



MNC 23181

Louis XV, 1746 (for the wedding by procuration at  
Dresden of French Dauphin with Marie-Josèphe von  
Saxe)

13x15.5 H16.2

1963 Anne-Jules Noailles bequest

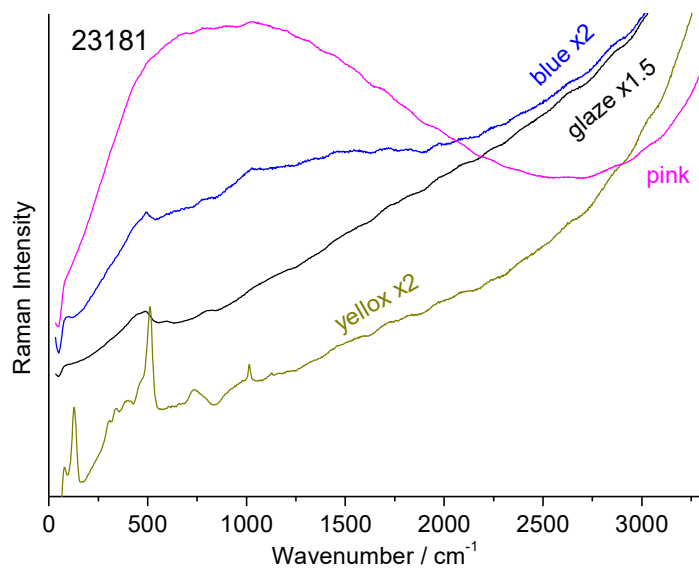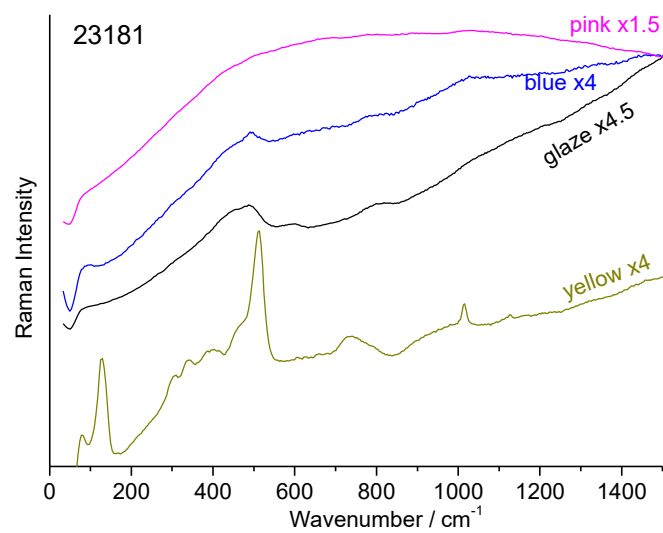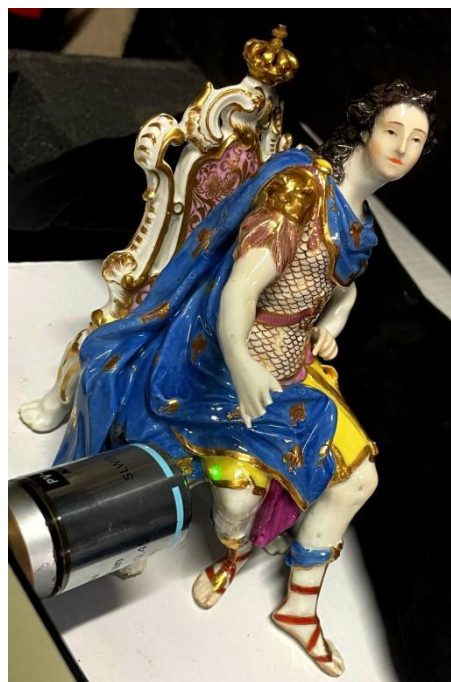

MNC 23181  
 (Louis XV figure  
 1746  
 wedding of  
 France Dauphin  
 and  
 M.-J. de Saxe)

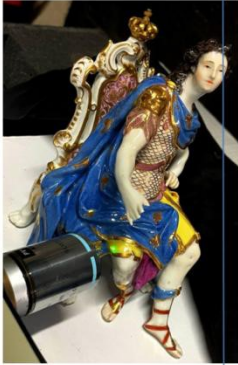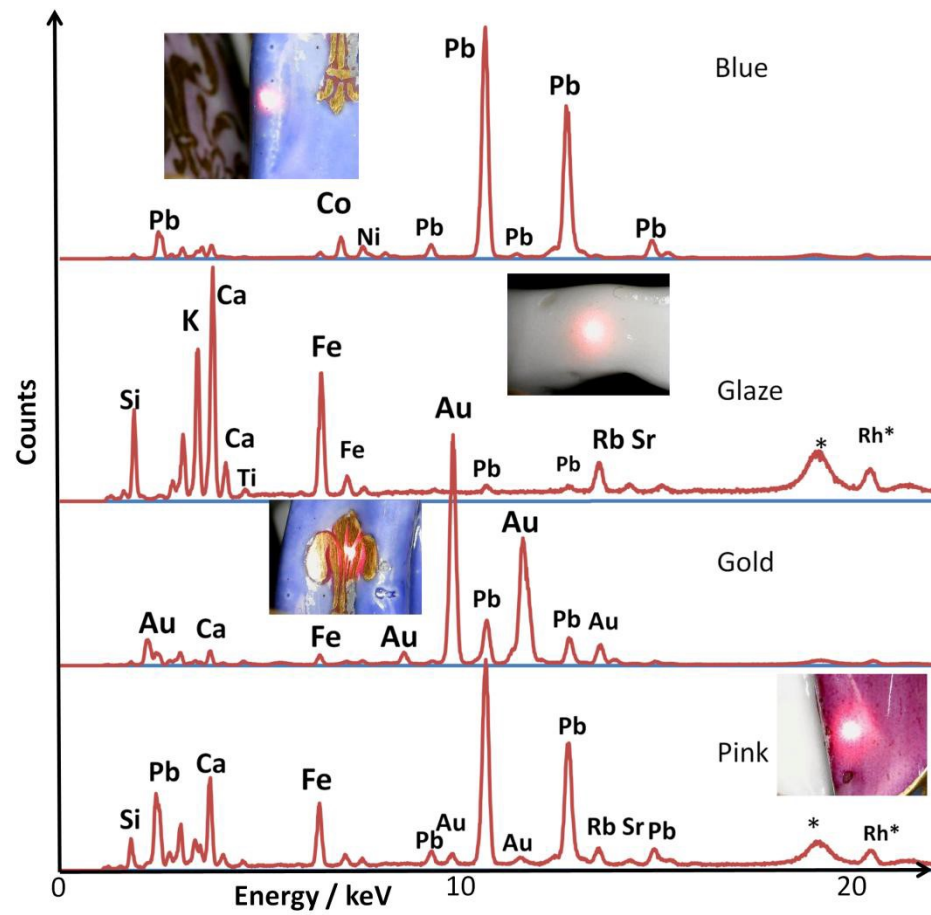

MNC 11205  
(Bacchus &  
bacchante  
group)

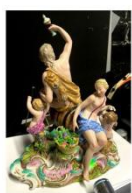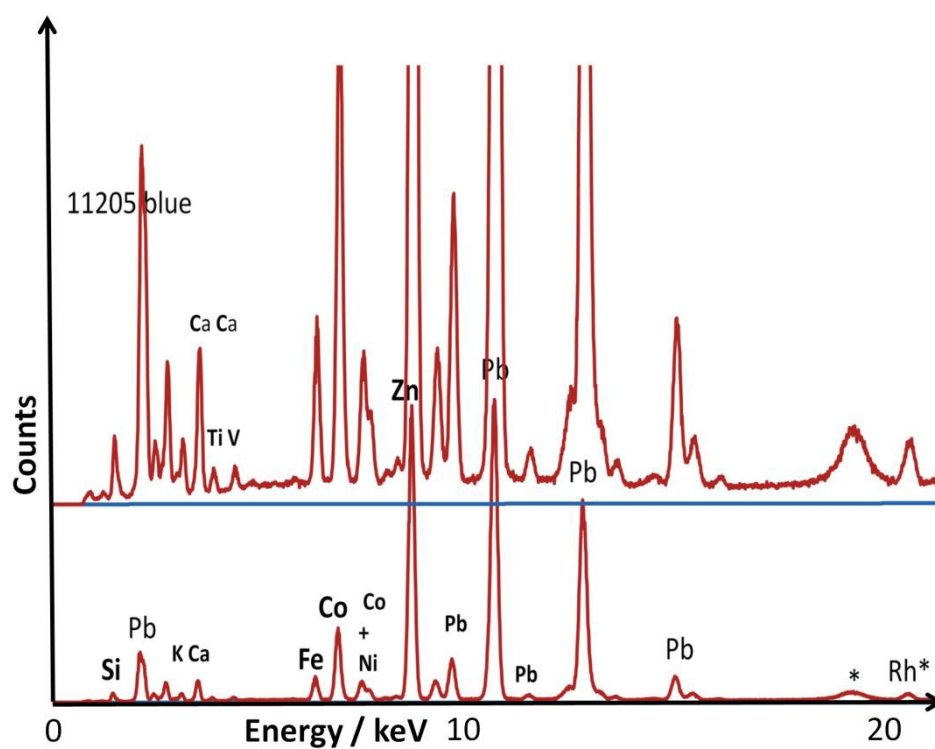

MCSR LXXIX soupière (MNR 1949)

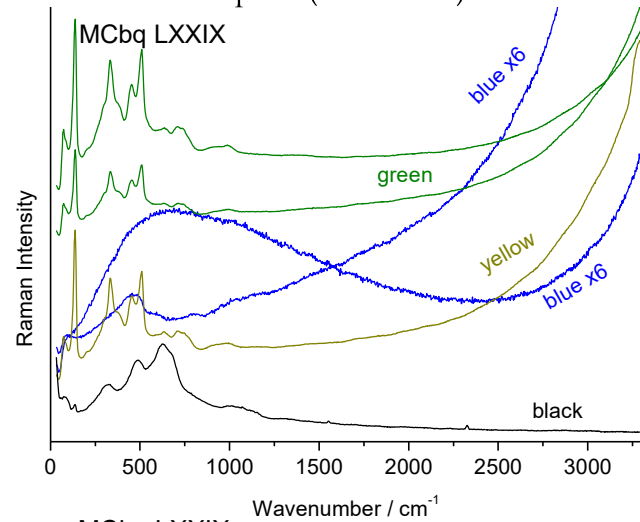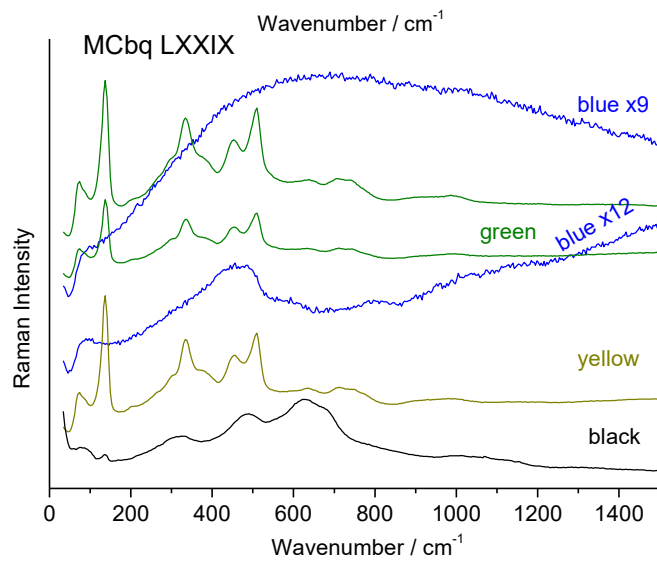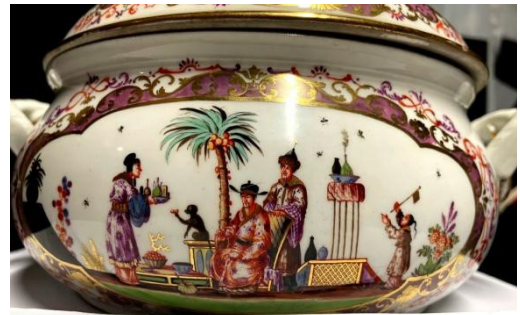

c.a. 1720-1730  
20.4x H7.3

MCSR  
LXXIX  
Large  
Tureen  
ca 1720

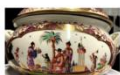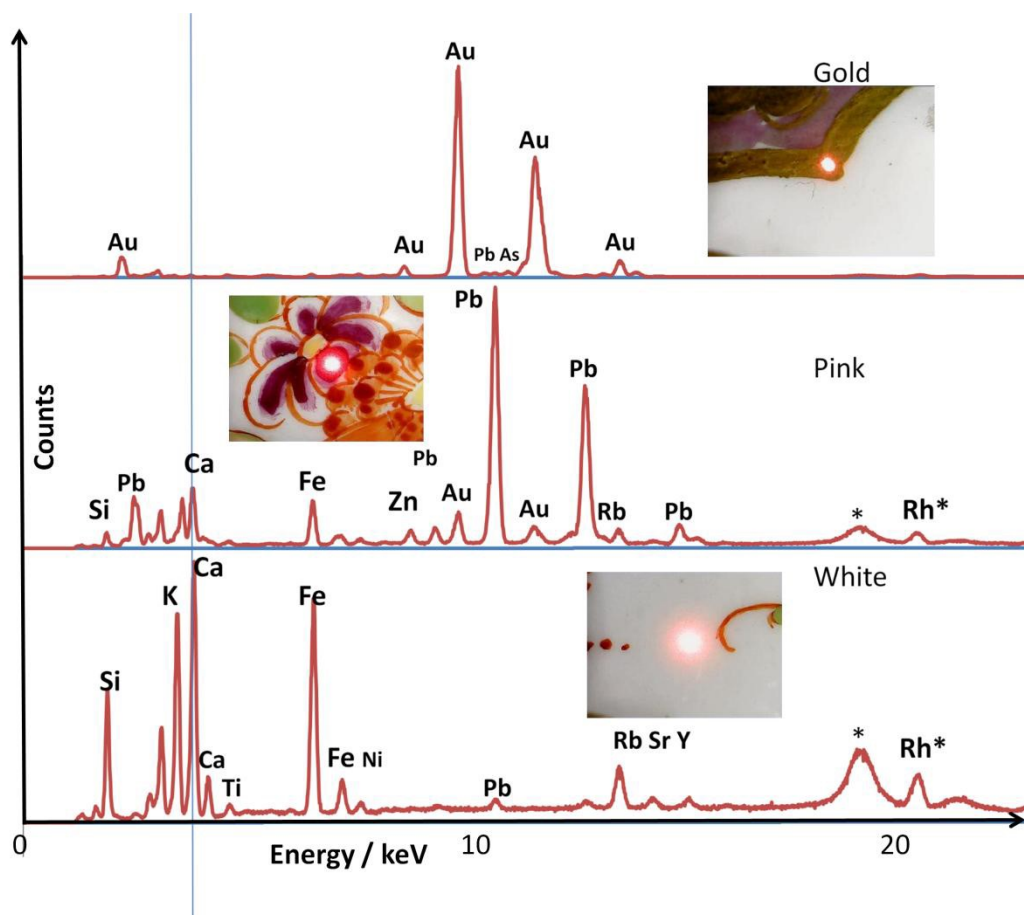

MCSR  
LXXIX  
Large  
Tureen  
ca 1720

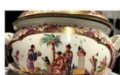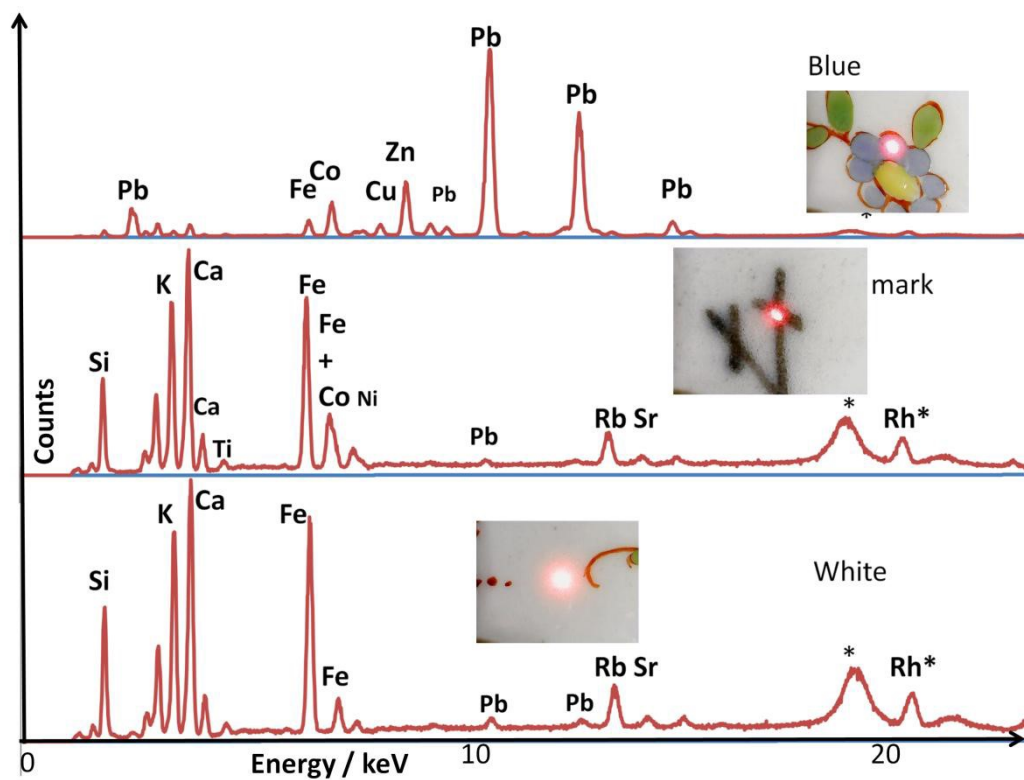

469.11.1  
c.a. 1720-1725  
Acquisition in 1806

Tea cup  
10x8 H7  
Tasse à thé litron

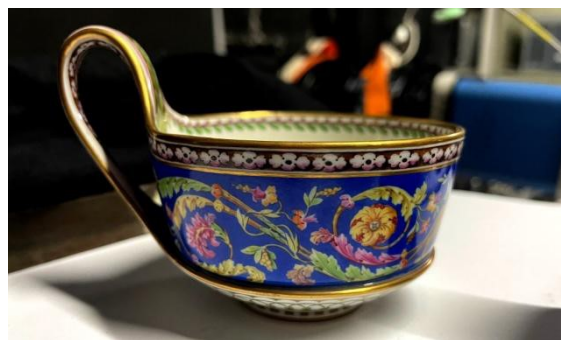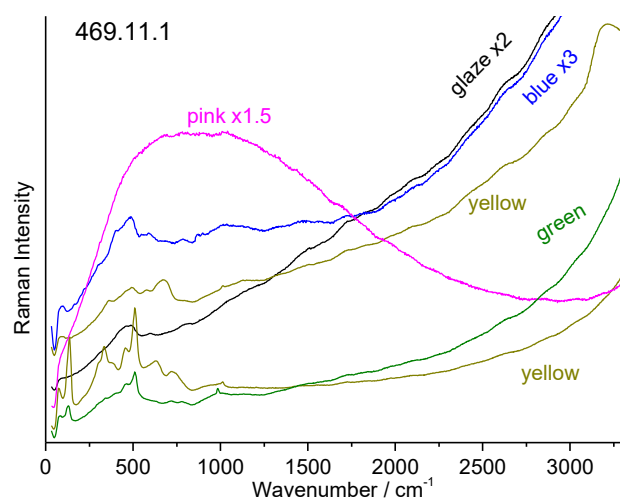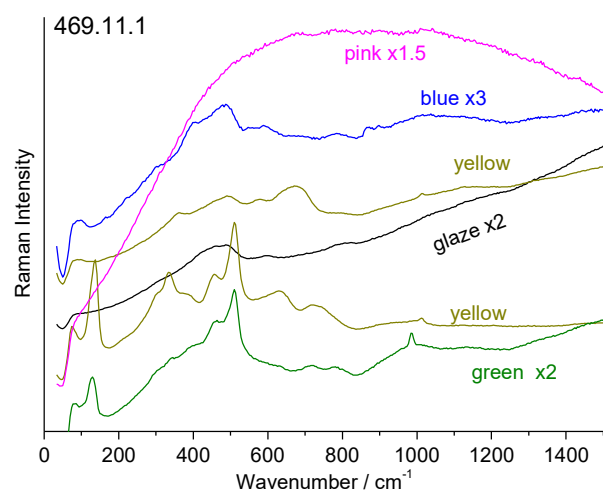

MNC 469.11 .1

Tea cup

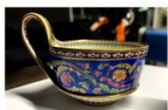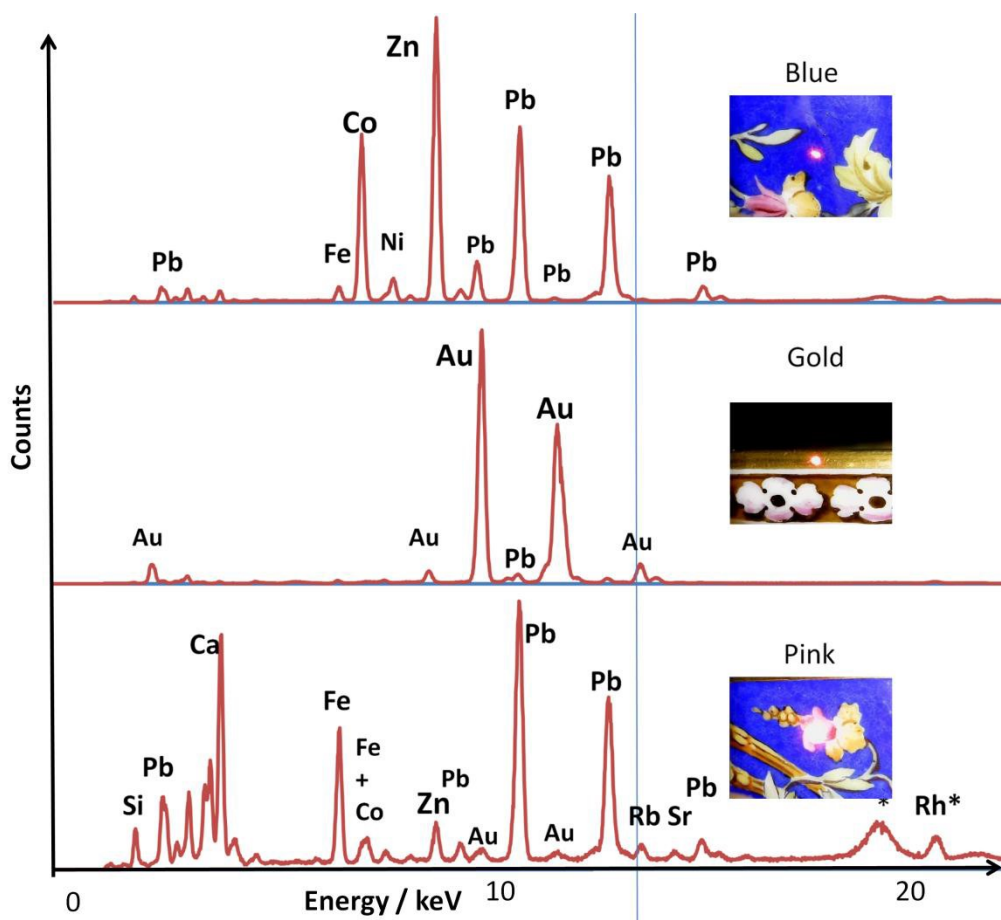



MNC 8160.2

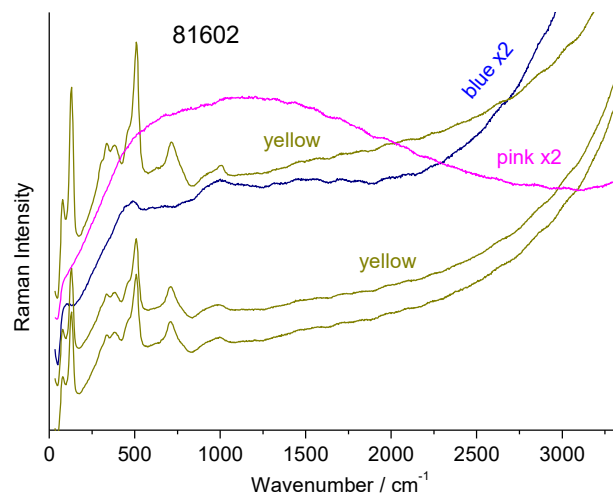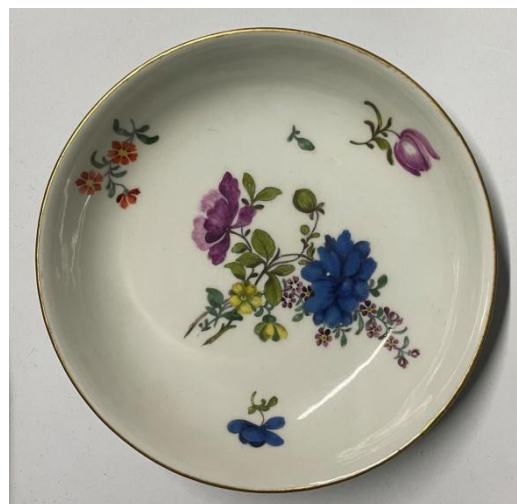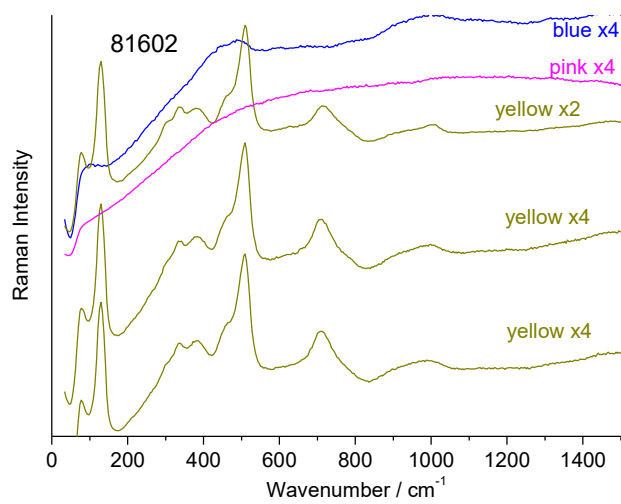

12x12 H2.7

1882 Lugel-Dolfus bequest

c.a. 1720

MSCR LVII 1 tasse (MNR récup 1949)

c.a. 1745

Décor à la Watteau

Watteau-like décor

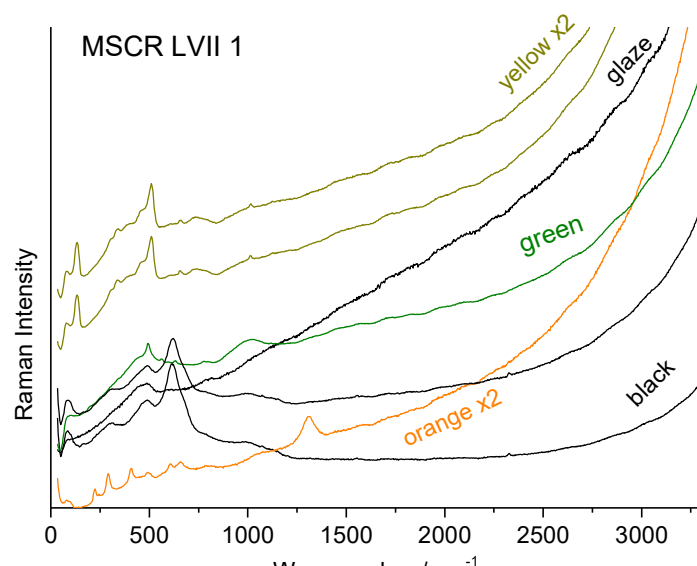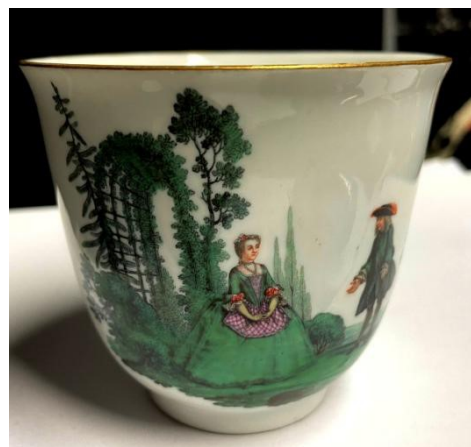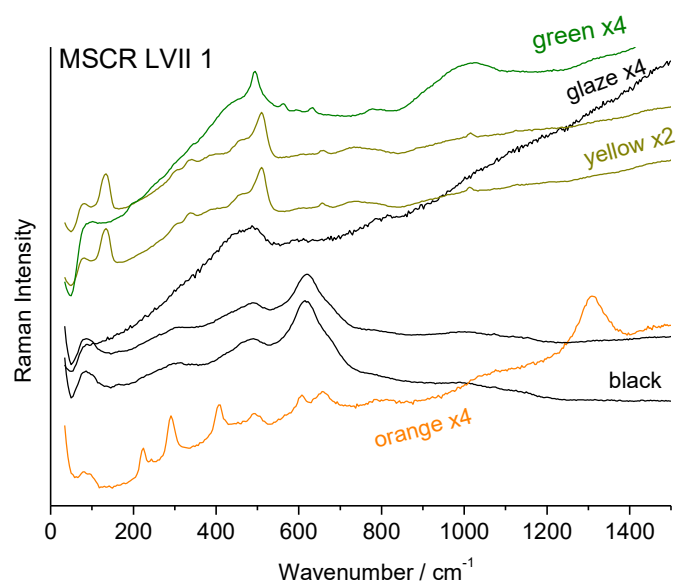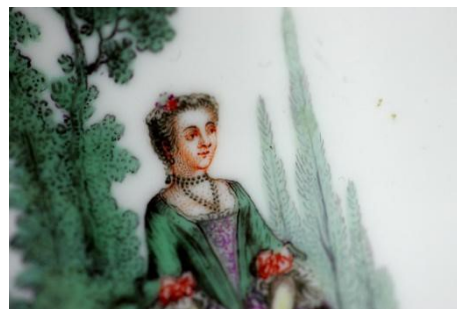

MNC 11213.2

7.7x6.5 H3.7

Gift of Dècle Eléonor 1902

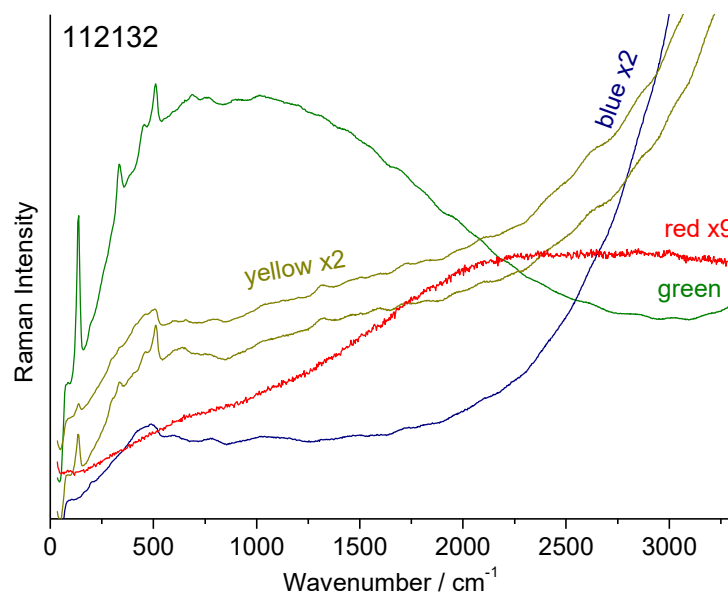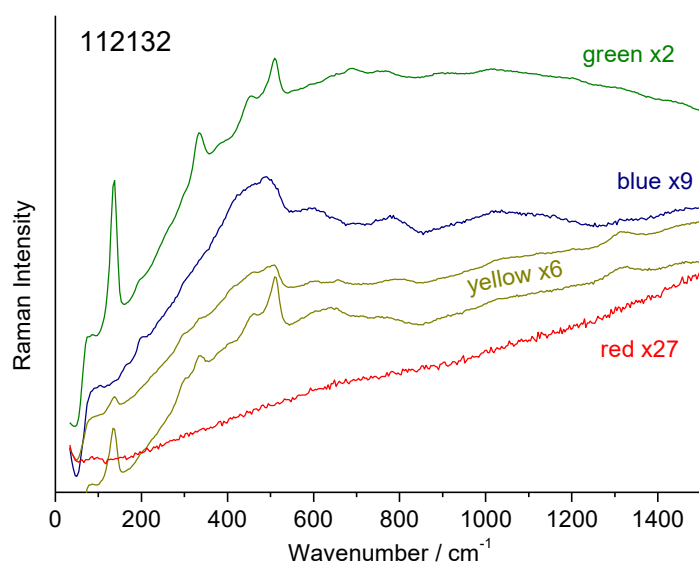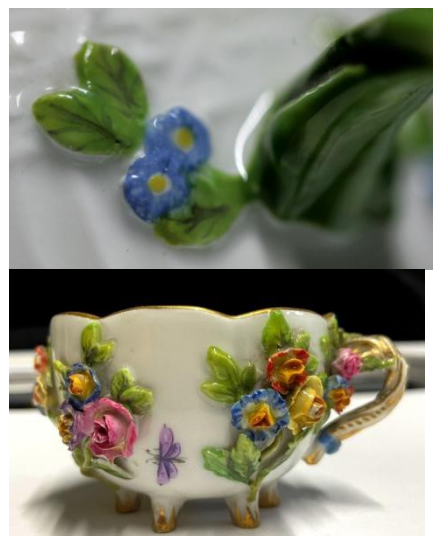

MNC 11213.2  
Coffee cup  
18<sup>th</sup> c.

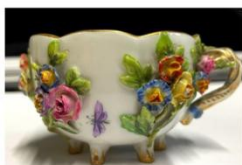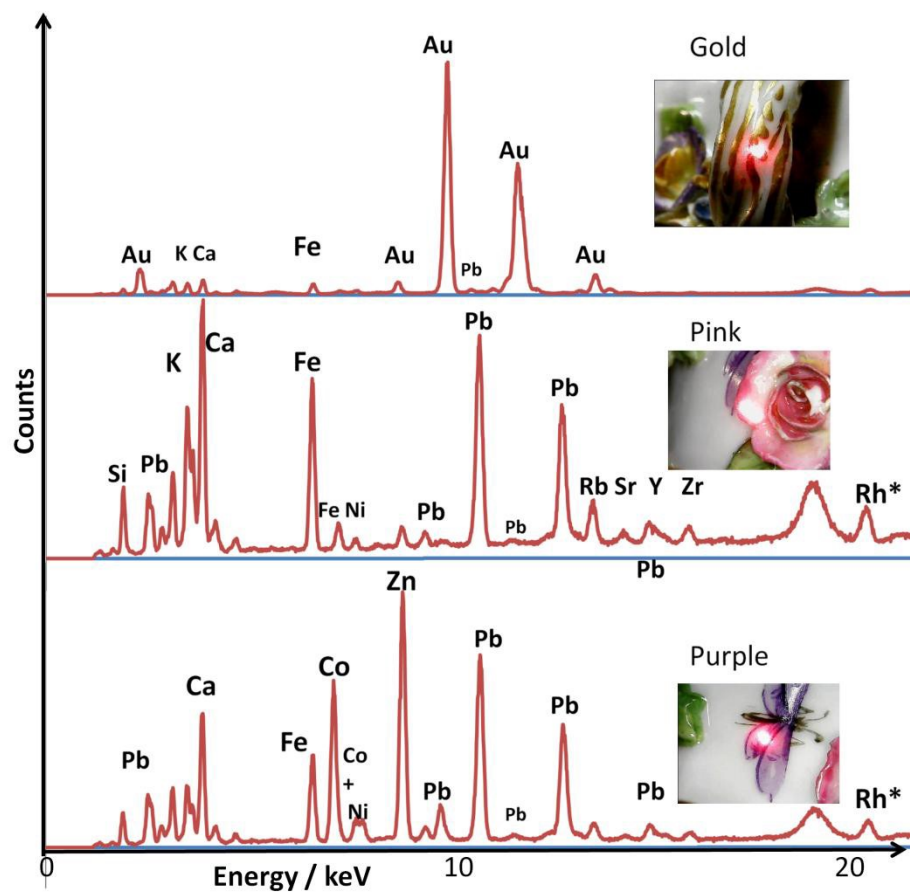

MNC 11213.2  
Coffee cup  
18<sup>th</sup> c.

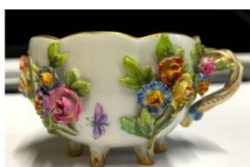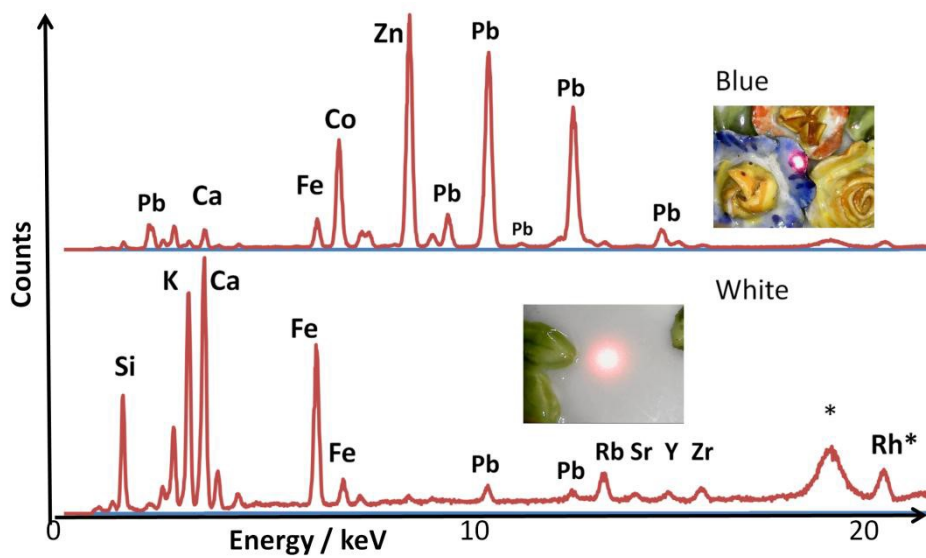

MNC 11051.2 Figure  
5.4x4.7 h12.2  
Gift in 1902 of Eléonor Dècle

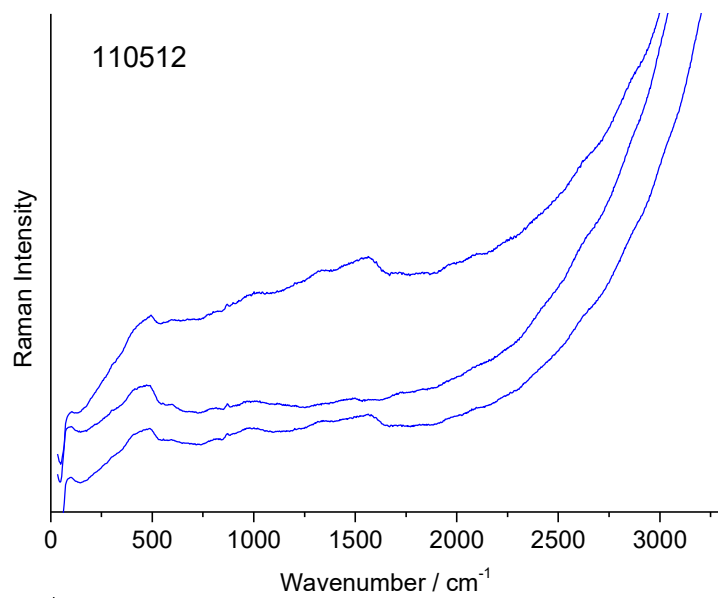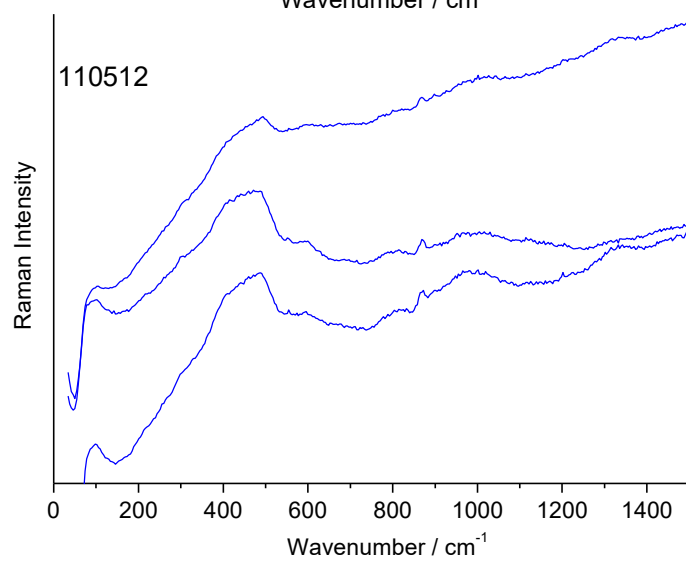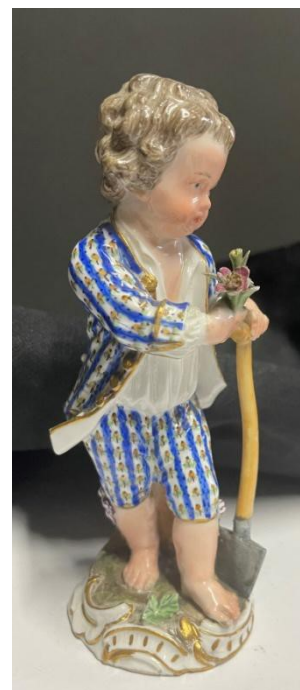

MNC 11051.2  
(boy figure)

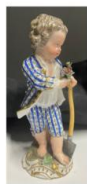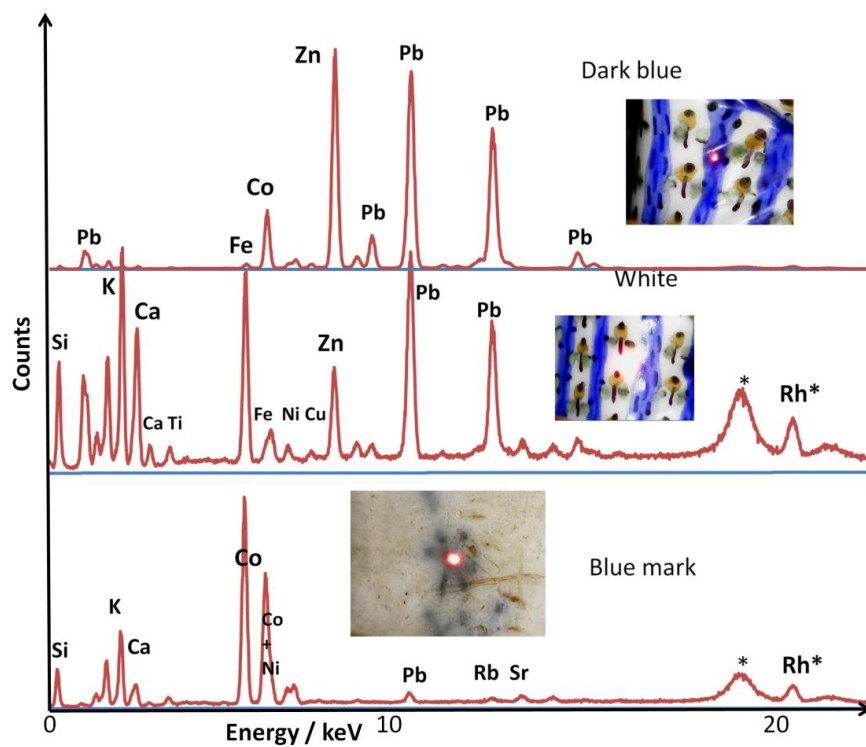

MNC 11051.2  
(boy figure)

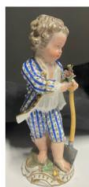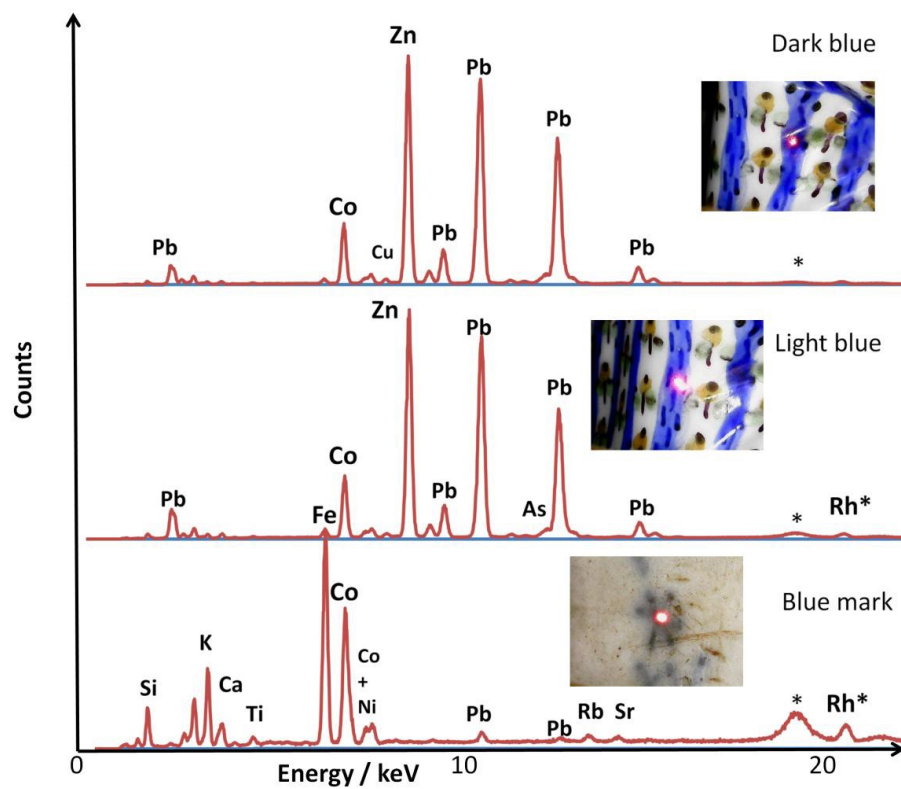

marque

vieu coal, decor avec ZnV



MNC 469.5.1 coffee cup

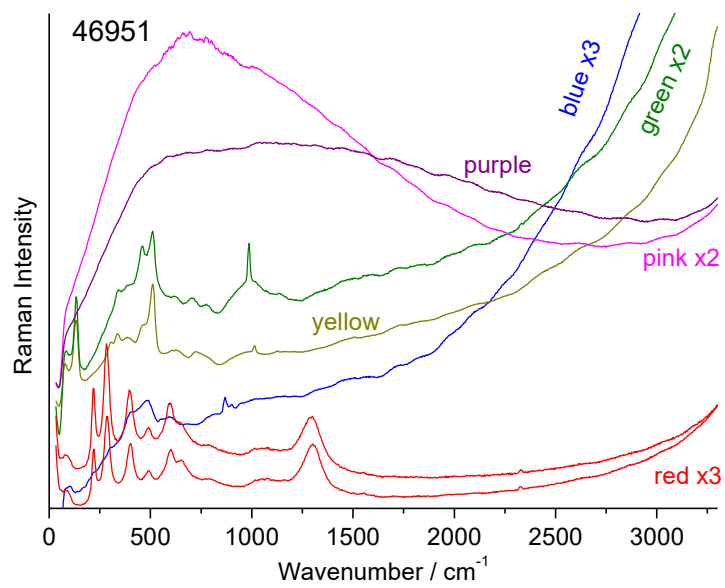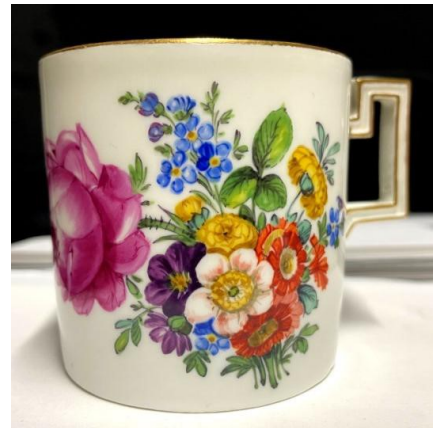

8.5x6.5 H6.3

19<sup>th</sup> c.?

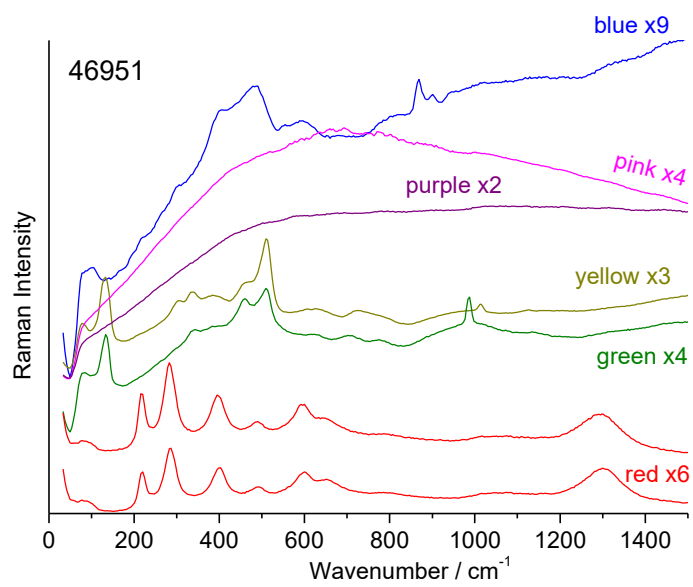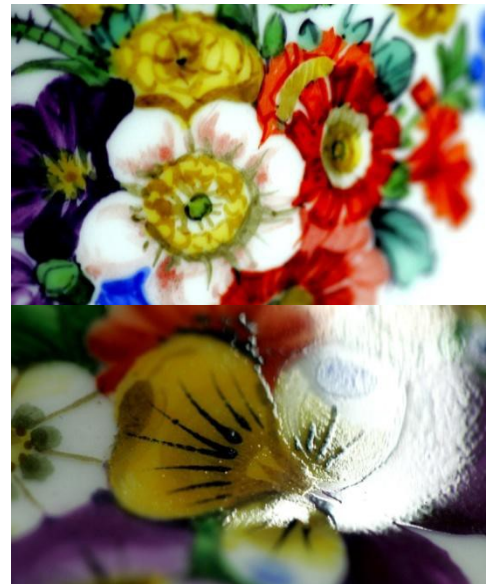



MNC 469.5.1  
(coffee cup)

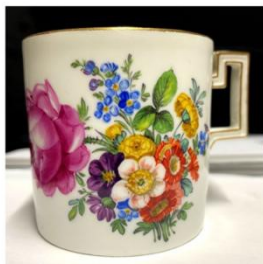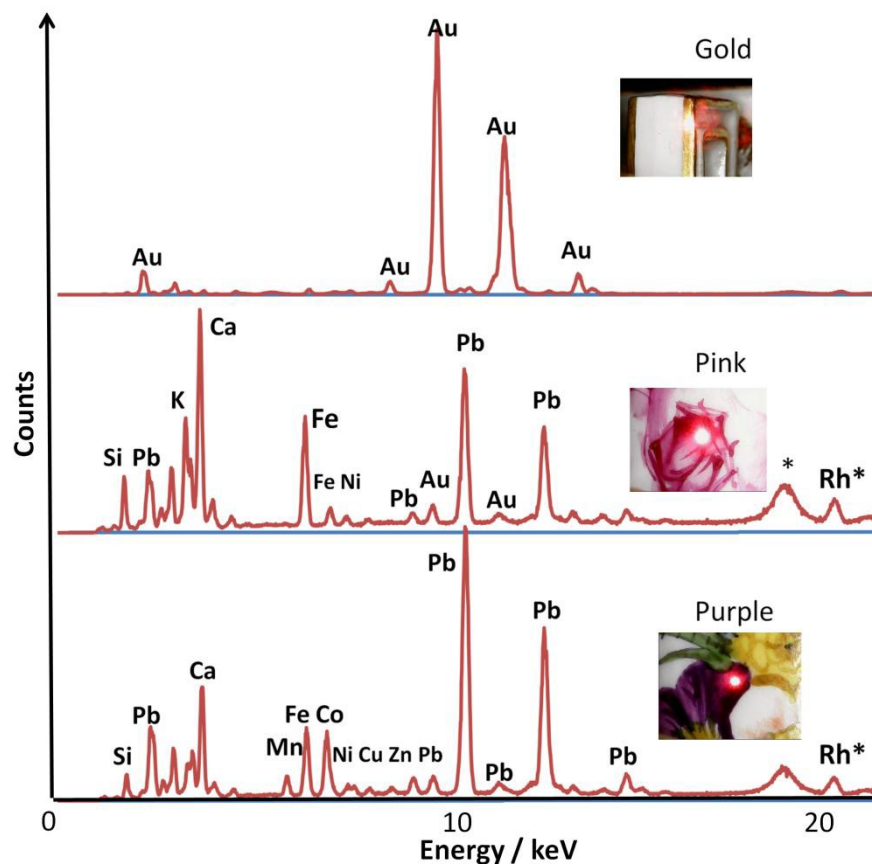

MNC 469.5.1  
(coffee cup)

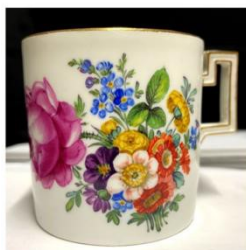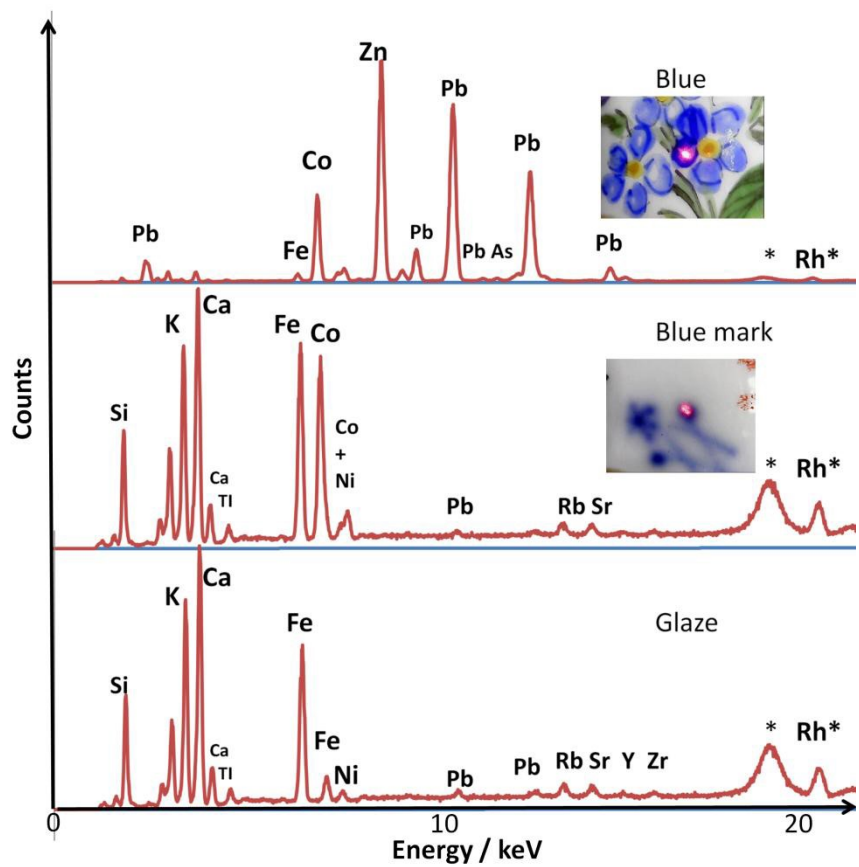

MNC 25340

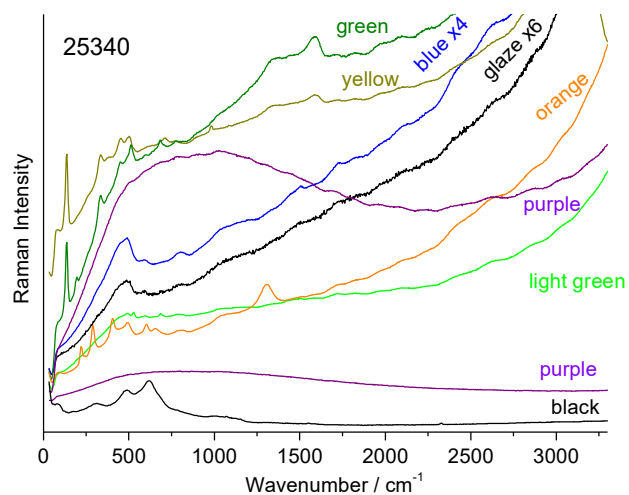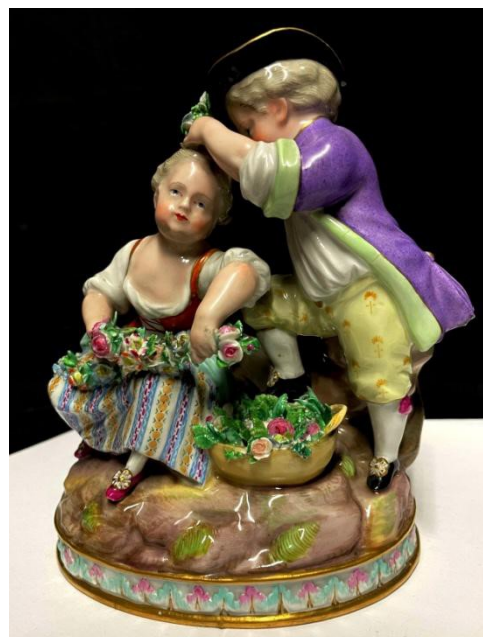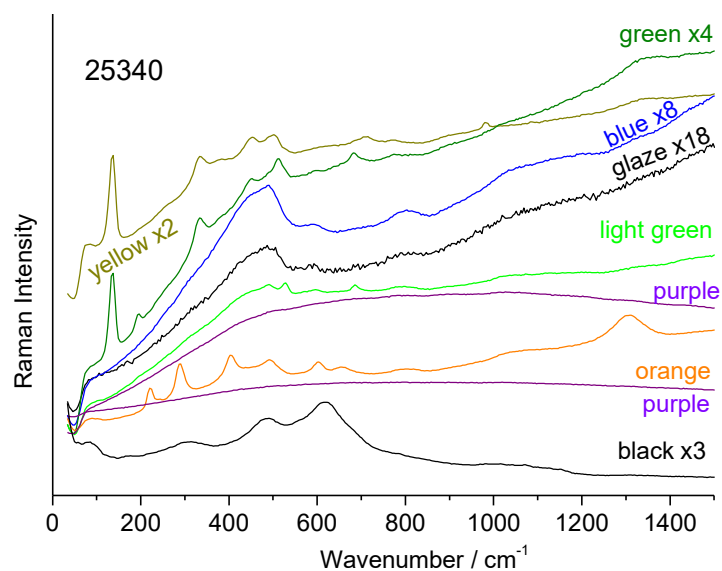

13.7x9.3 H15.5  
Cellier bequest, 1986  
19e

MNC 14201 teapot

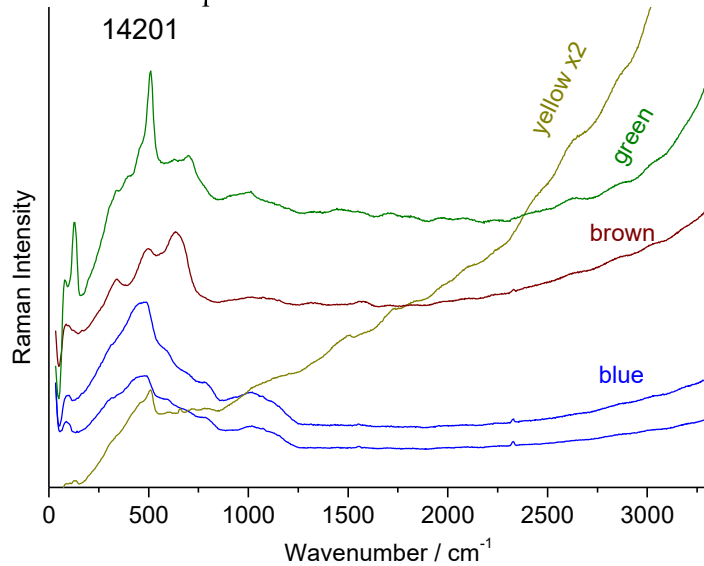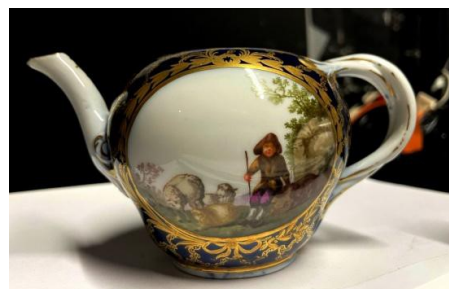

Antoine-Gaston de Grollier  
bequest (1908)

18th c.  
9.4 H9.4

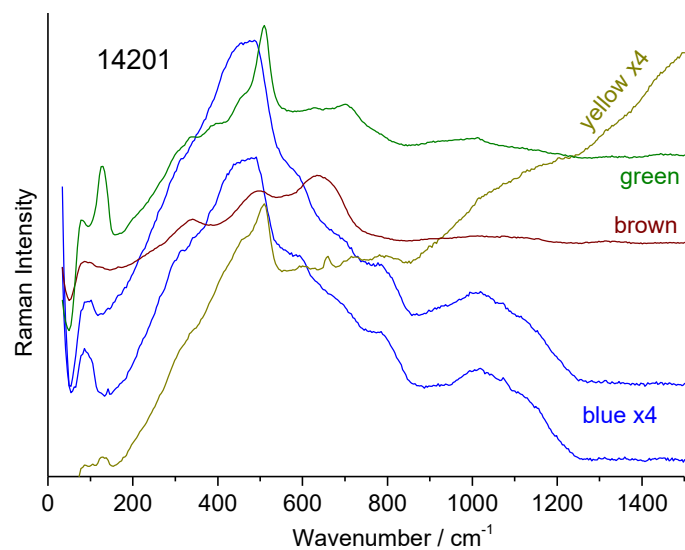

MNC 14201  
teapot

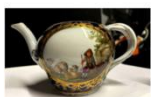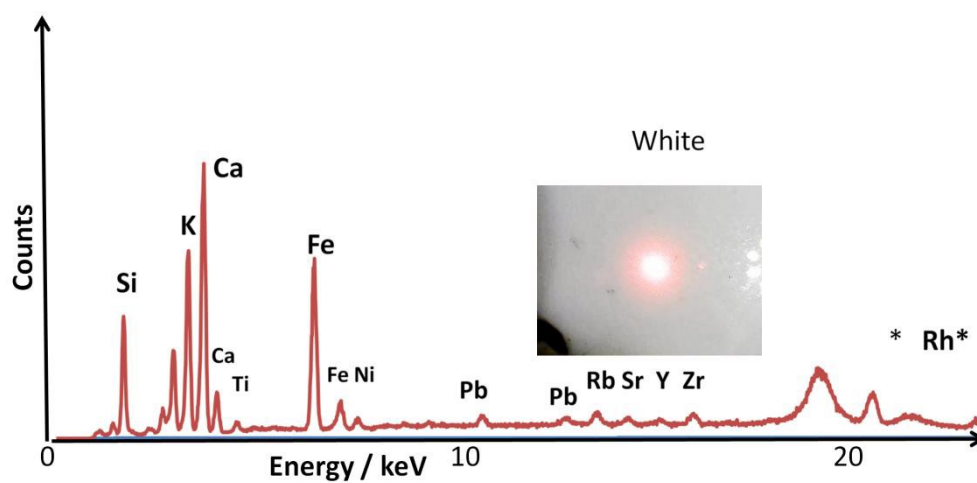

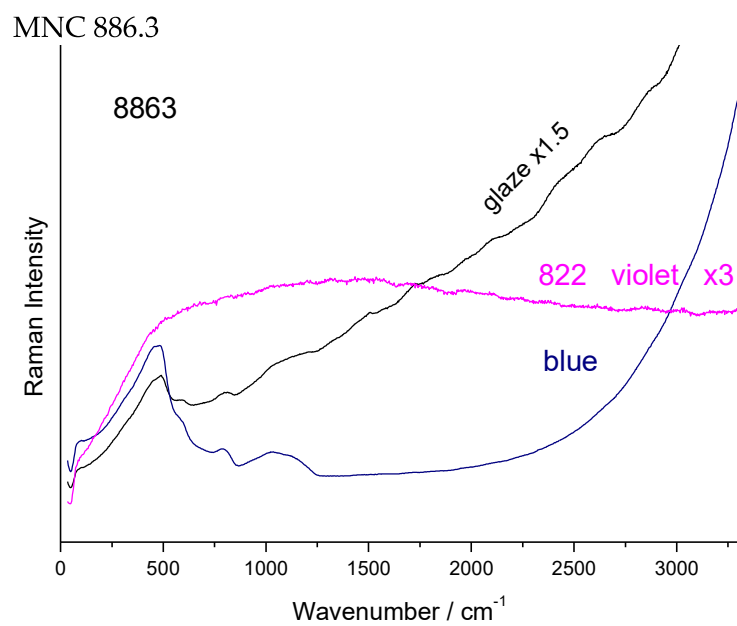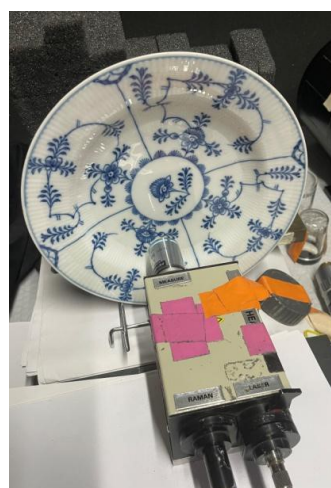

Envoi de M. Kühn, Meissen  
Acquisition by M. Kühn from  
Meissen Factory  
In 1825  
24.5x24.5 h3.2

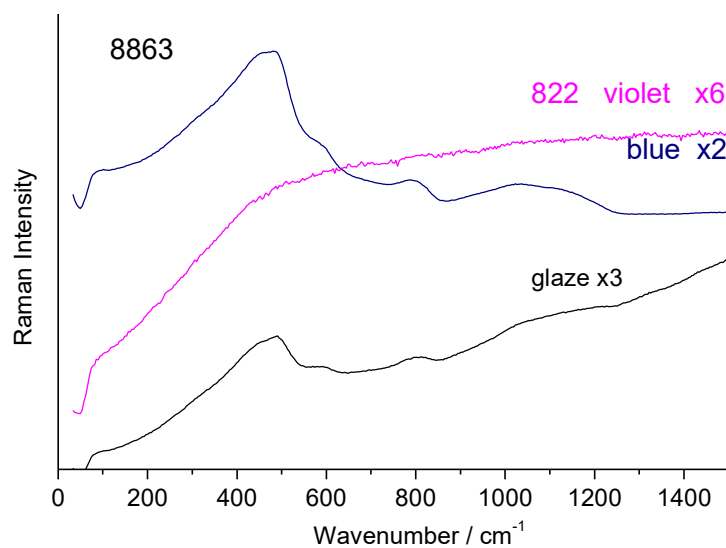

MNC 886.3  
1825

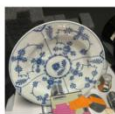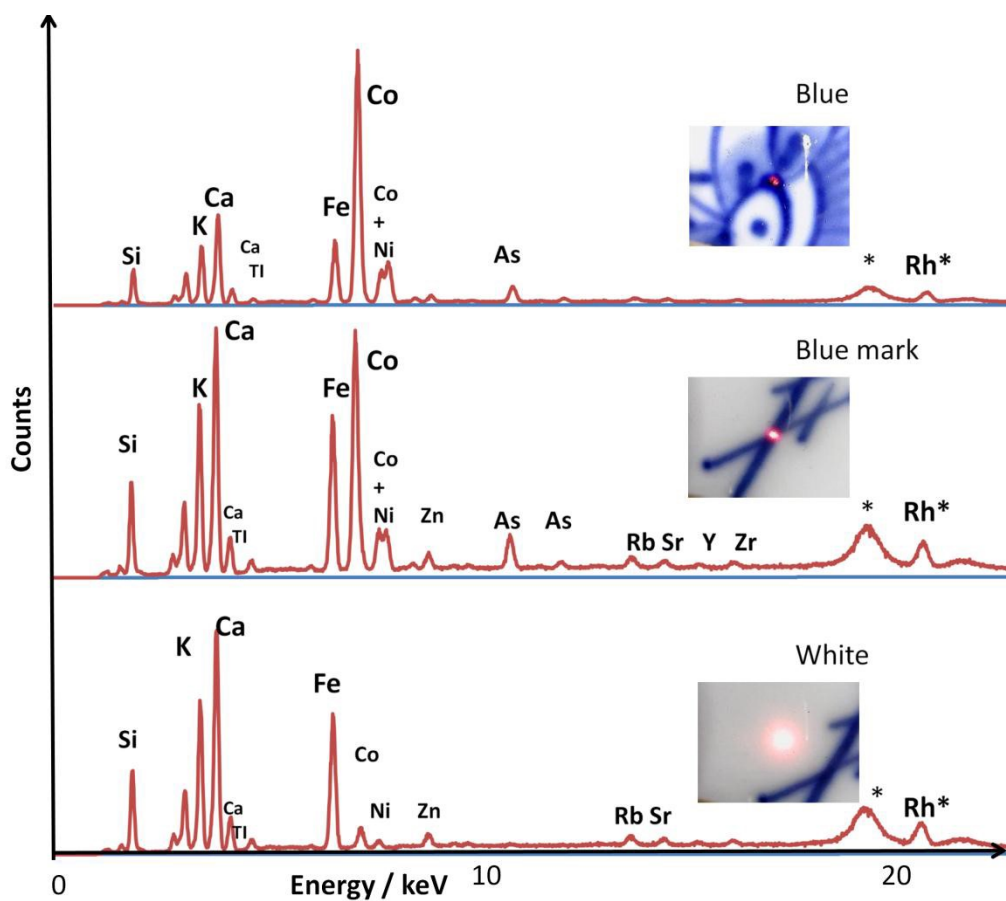

MNC 2247.10  
43.3x33 H5.5

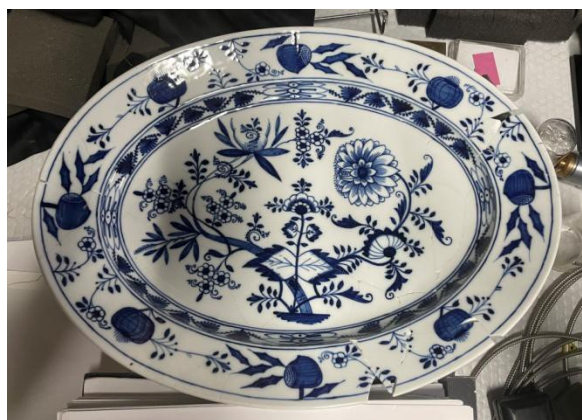

Acquisition in 1836

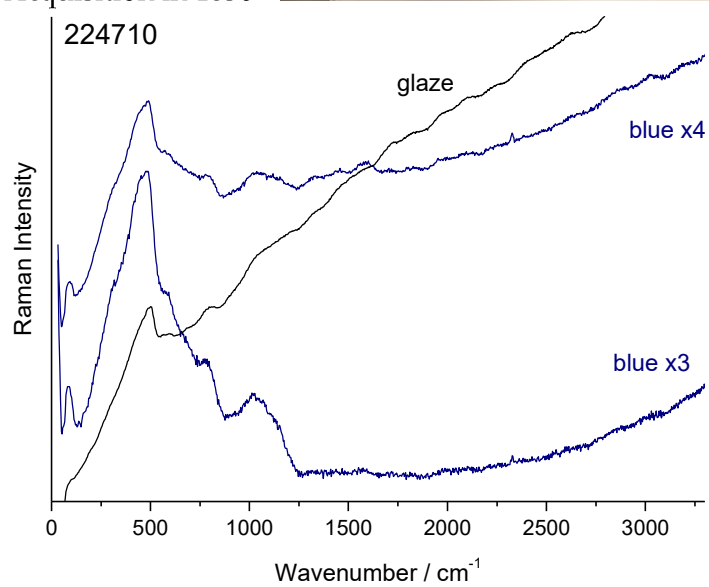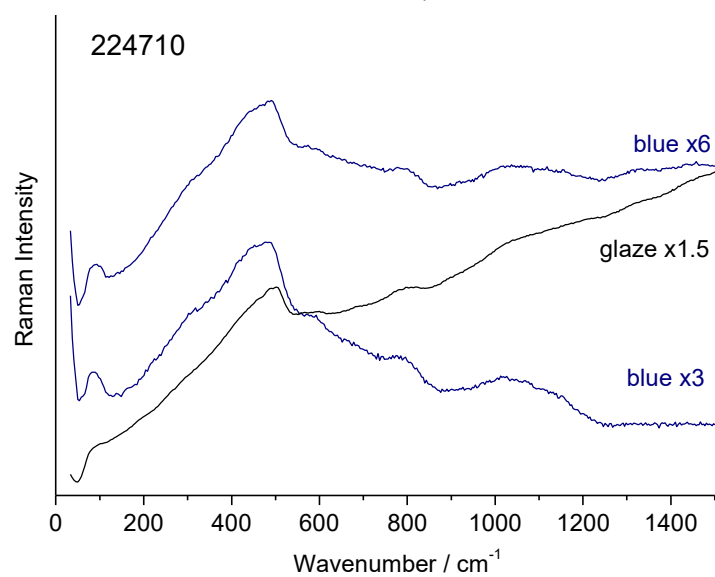

MNC 2247.10  
dish

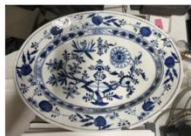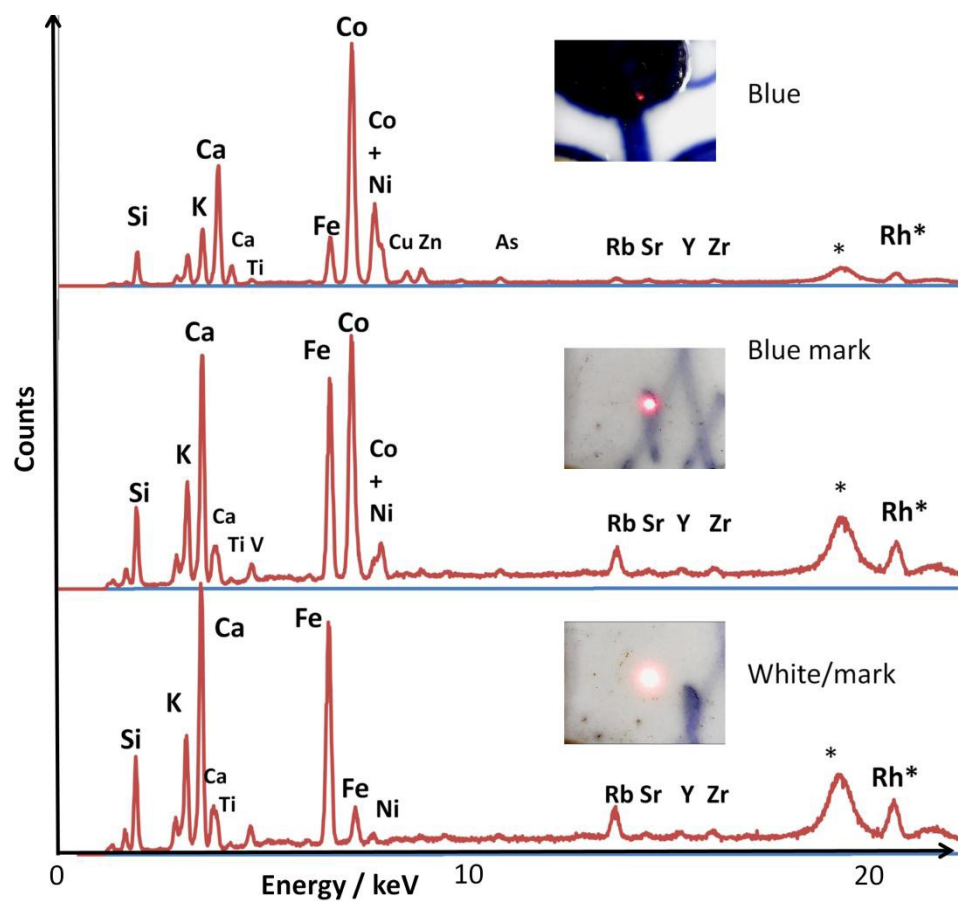

MNC 2247.10  
dish

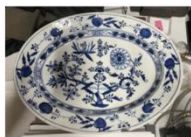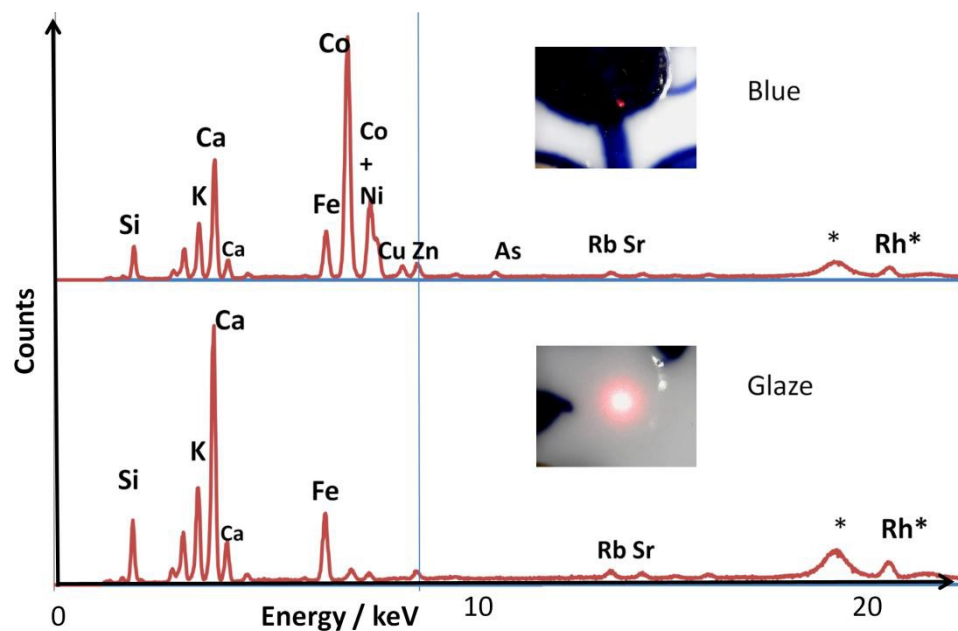



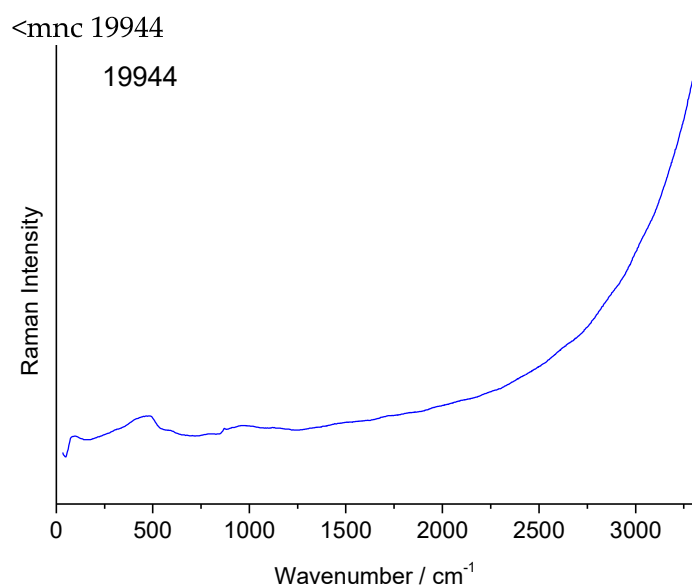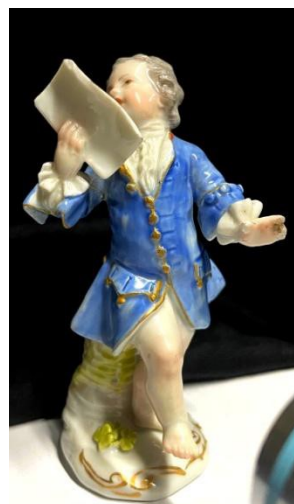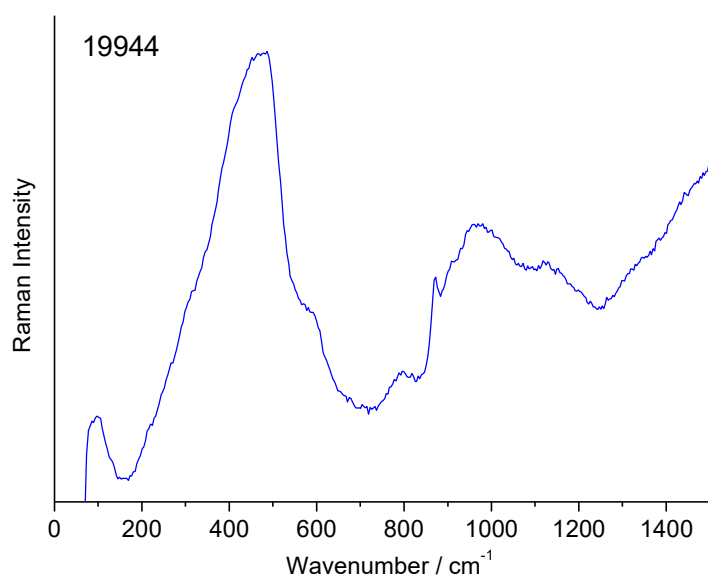

Ange chanteur  
Singing Angel Figure  
4.6x4.1 H8.3  
Formerly, collection of Musée de  
Cluny  
Entered in Sèvres museum in  
1938  
18<sup>th</sup> c.

MNC 19944  
(singing angel)

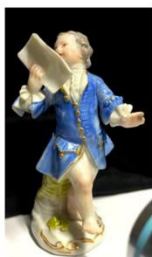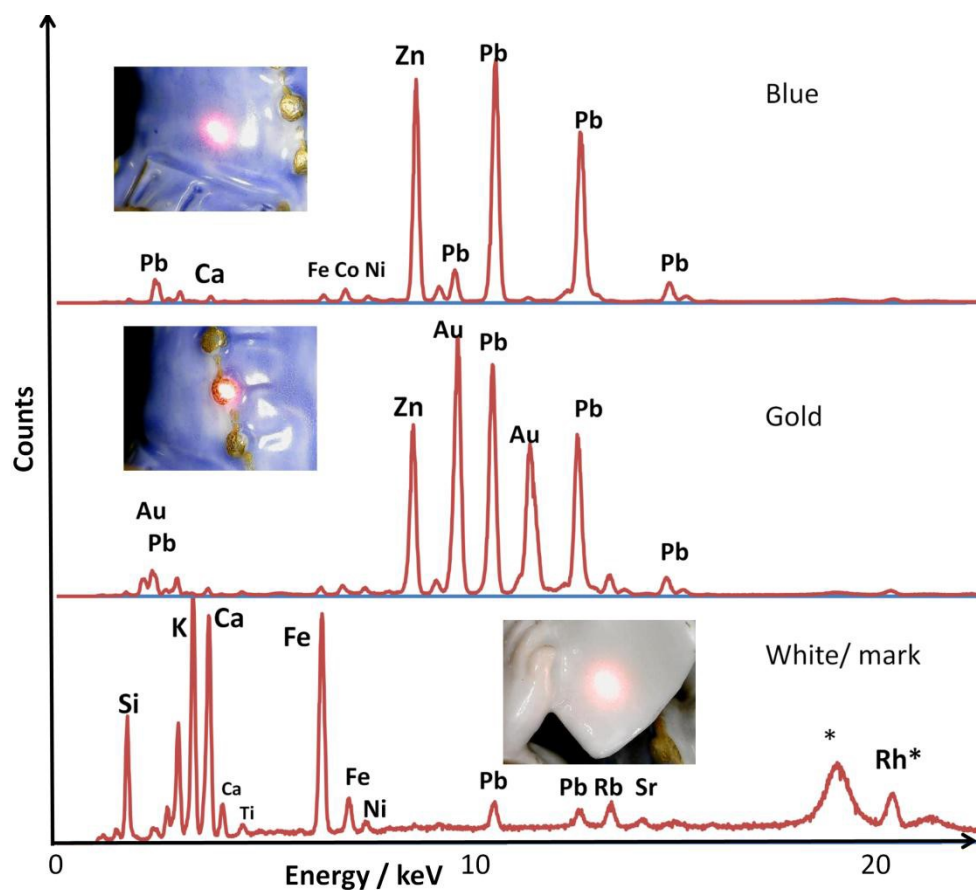

MNC 19944  
(singing angel)

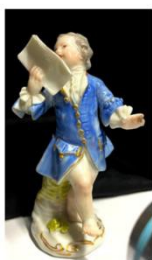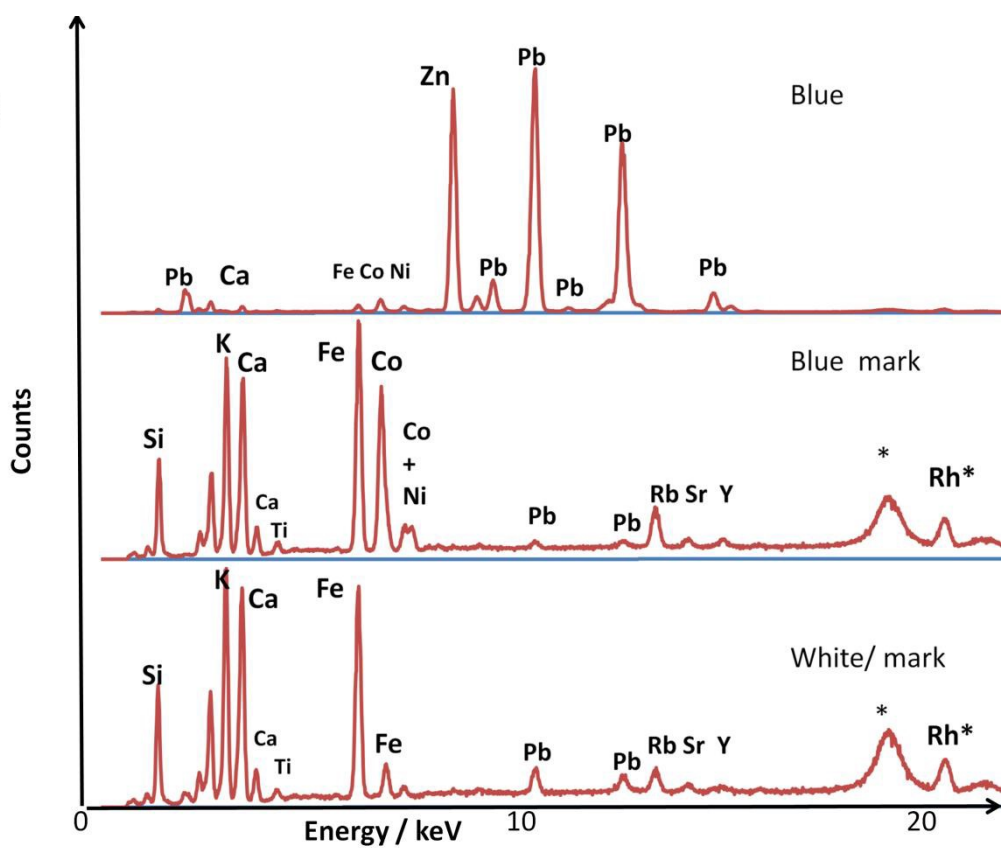

MNC 11064

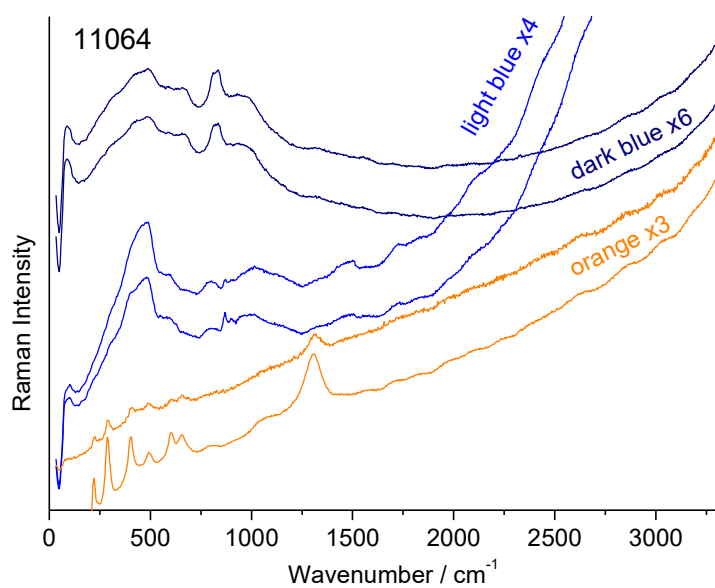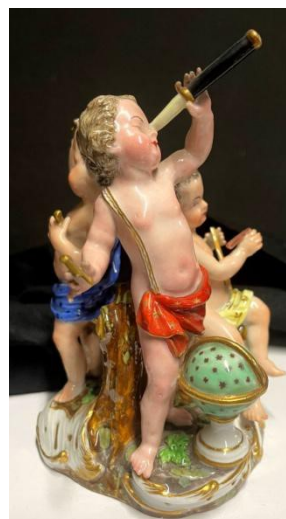

9.4x8.8 H12.2

Gift in 1902 of Eléonor Dècle

3 enfants géomètres et astronomes

3 geometer and astronomer

children group

18th c.?

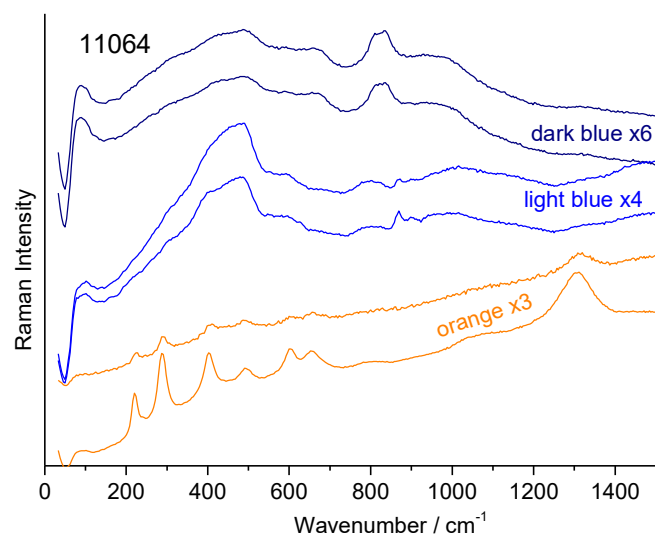

B

MNC 11064  
(Three  
geometer  
and astronomer  
children group)

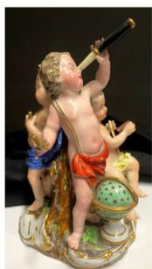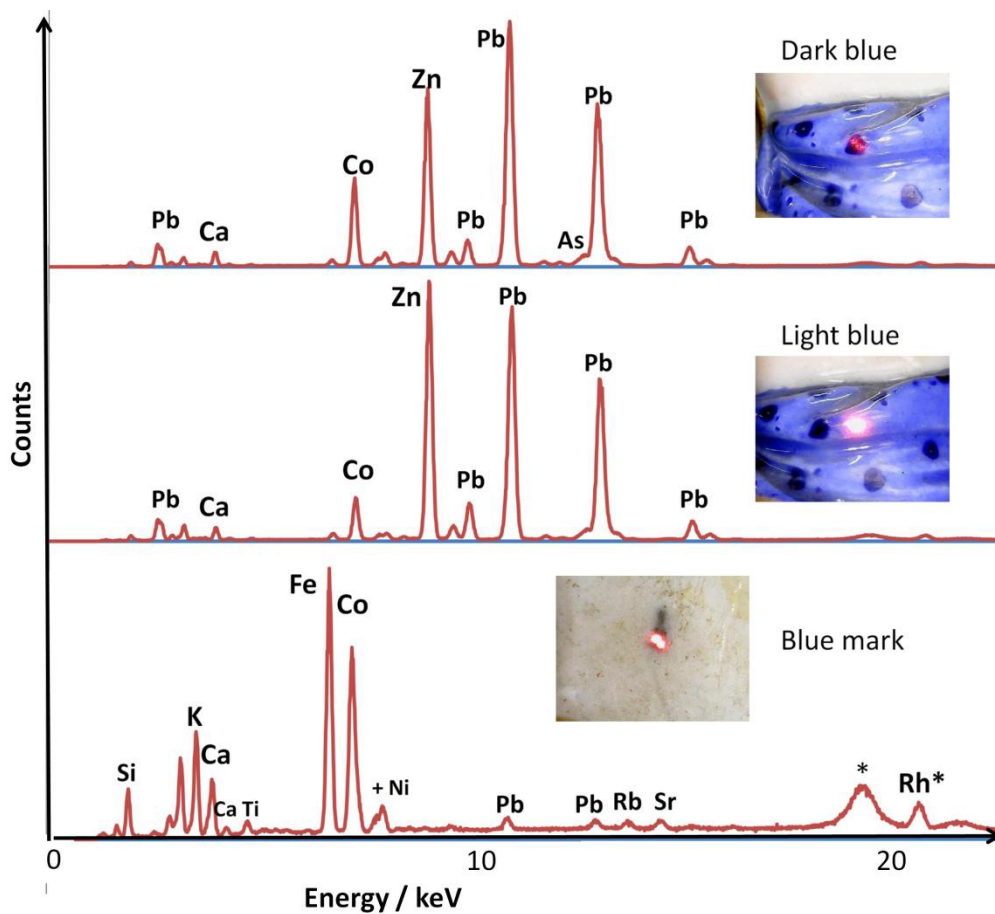

MNC 11064  
(Three  
geometer  
and astronomer  
children group)

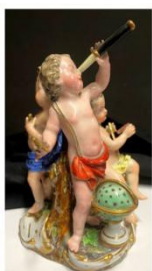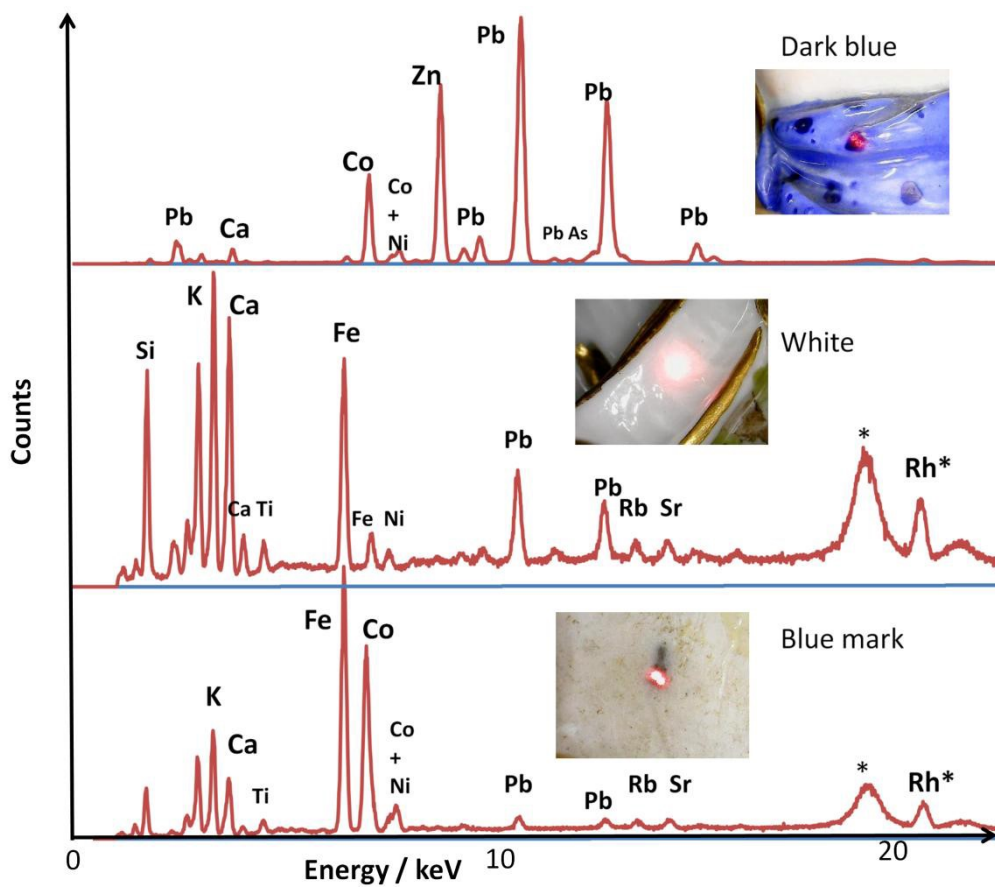

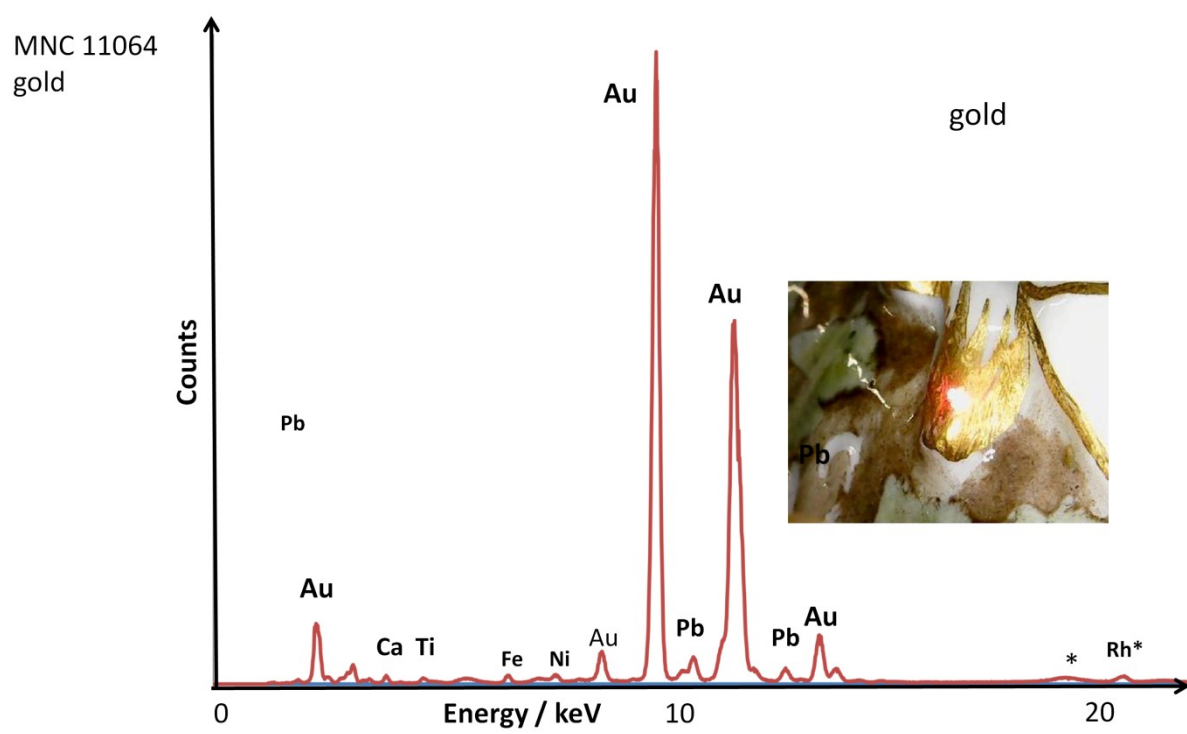

MNC 11205

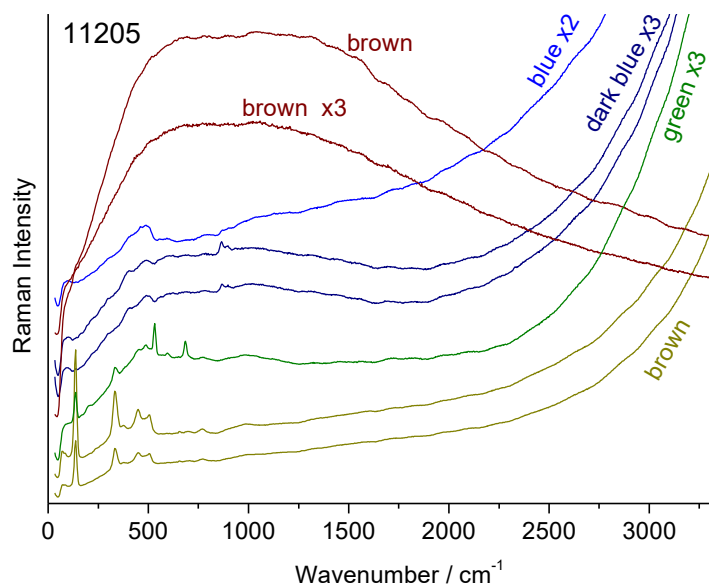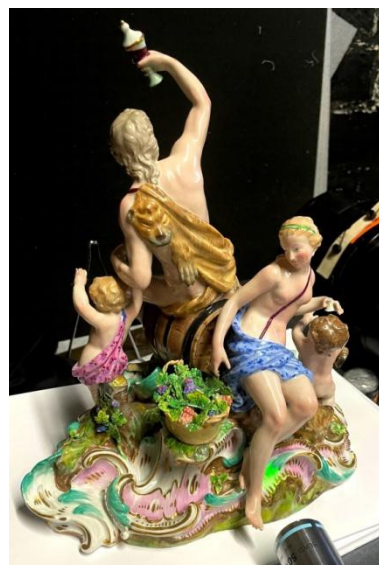

Bacchus & bacchante  
c.a. 1760, Kästner period  
(1740-1775)  
25x19.5 H27.2  
Gift in 1902 by Eléonore Dècles

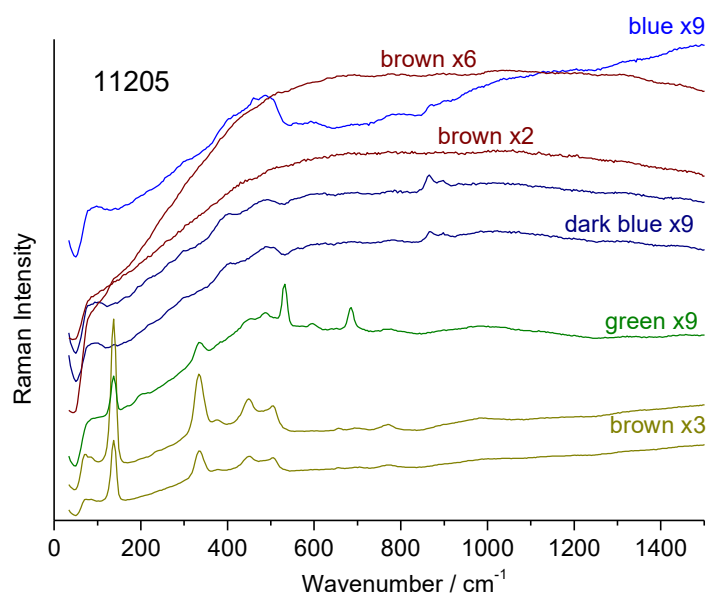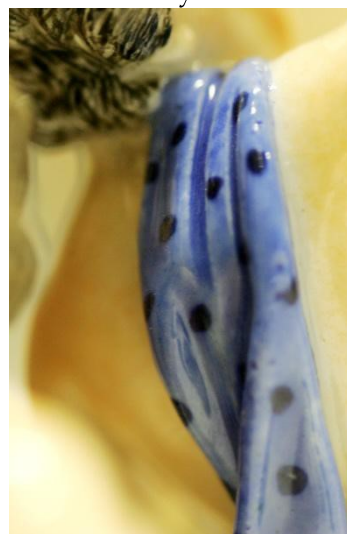



MNC 11205  
Kaendler  
Bacchus &  
bacchante group  
~1760

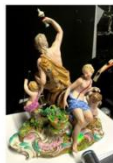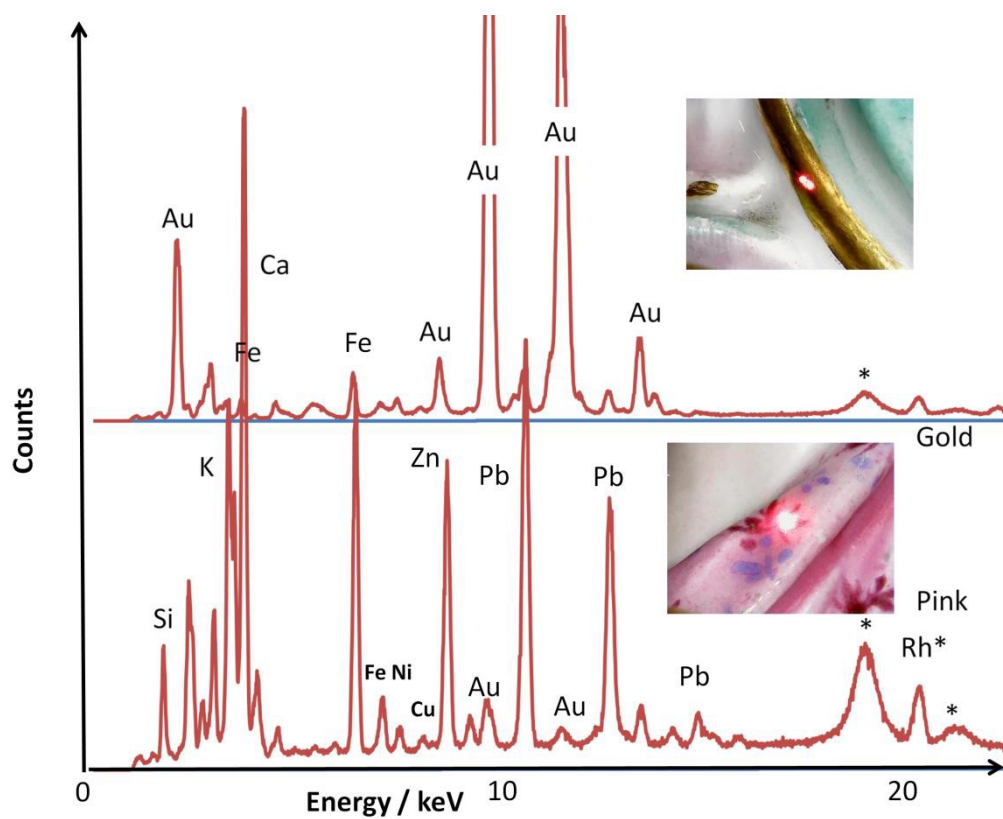

MNC 11205  
(Bacchus &  
bacchante  
group)

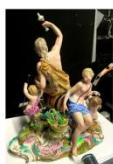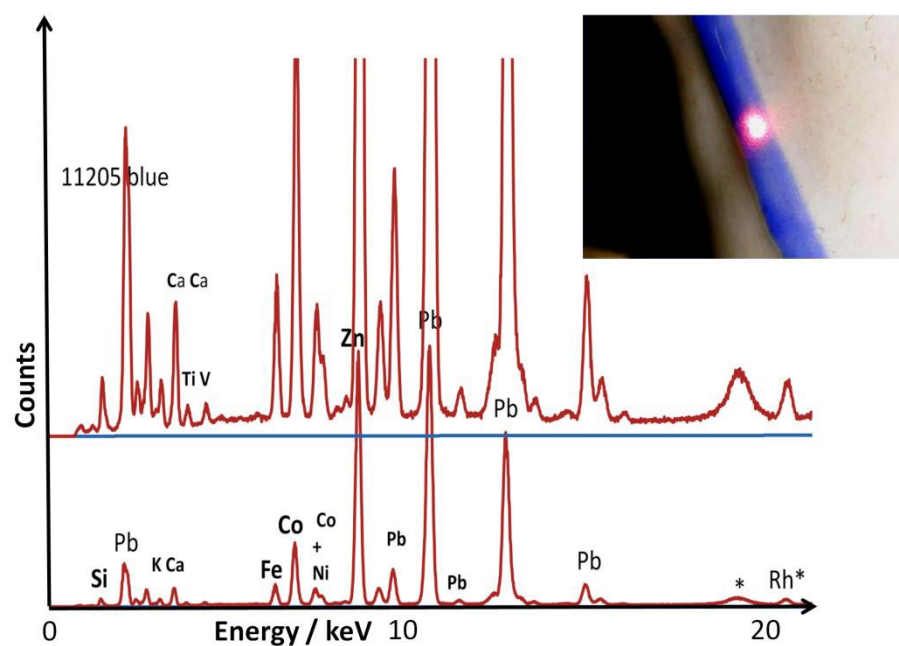



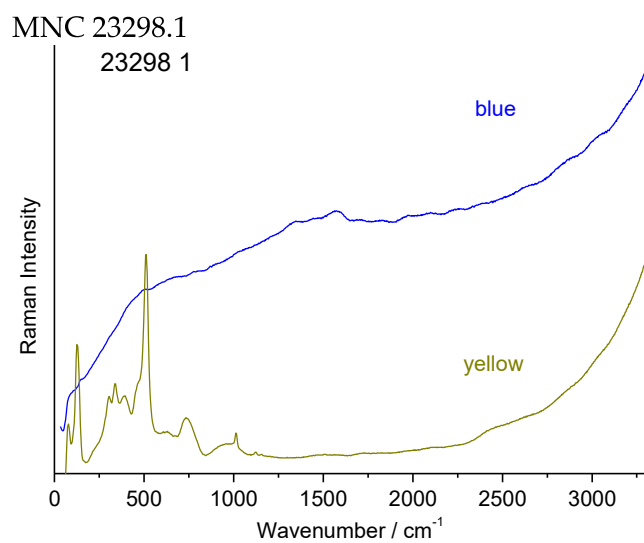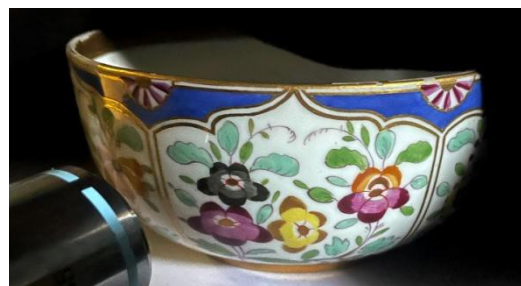

Écuelle  
Bowl  
c.a. 1774 to 1814 ( Marcolini production)  
Export pour Turquie  
Exportation for Turkish market  
Gift of Joseph Soustiel, 1967  
12x12 H10

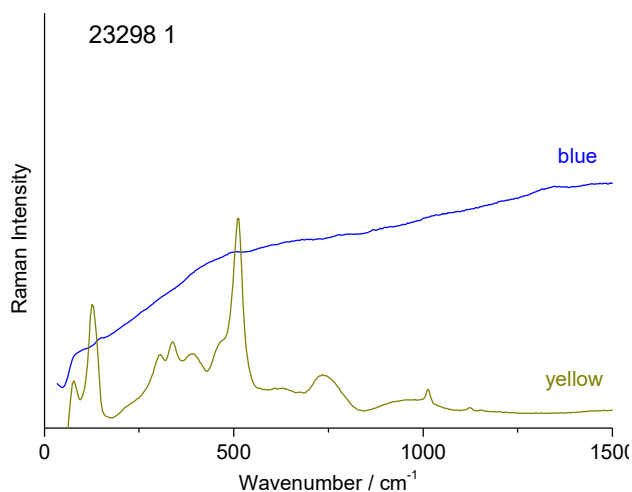

MNC 23298.1  
(cup for Turkish  
market)  
1774-1814

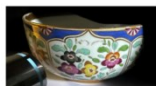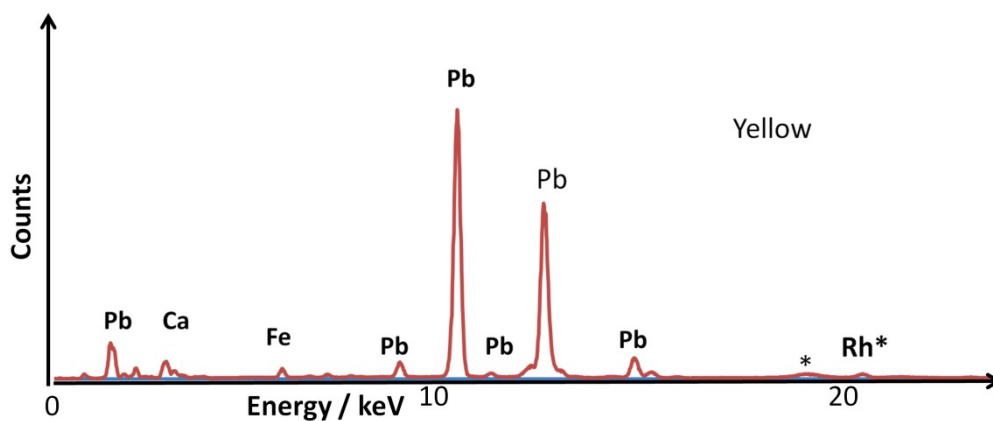

MNC 23298.1  
(cup for Turkish  
market)  
1774-1814

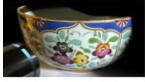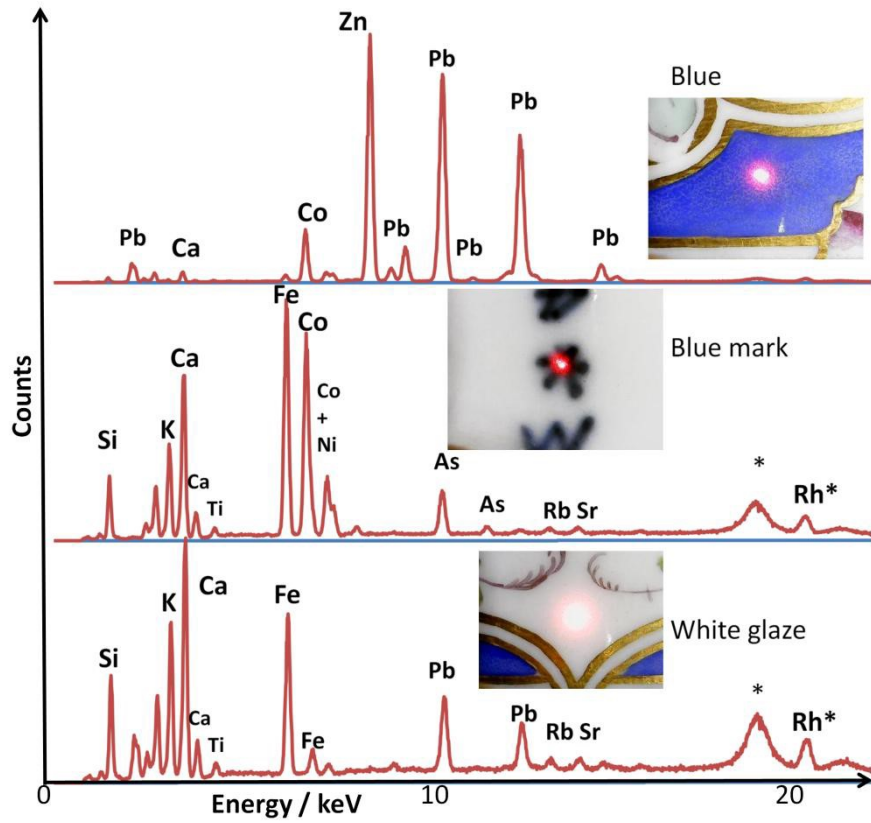

MNC 23298.1  
(cup for Turkish  
market)  
1774-1814

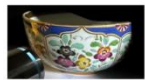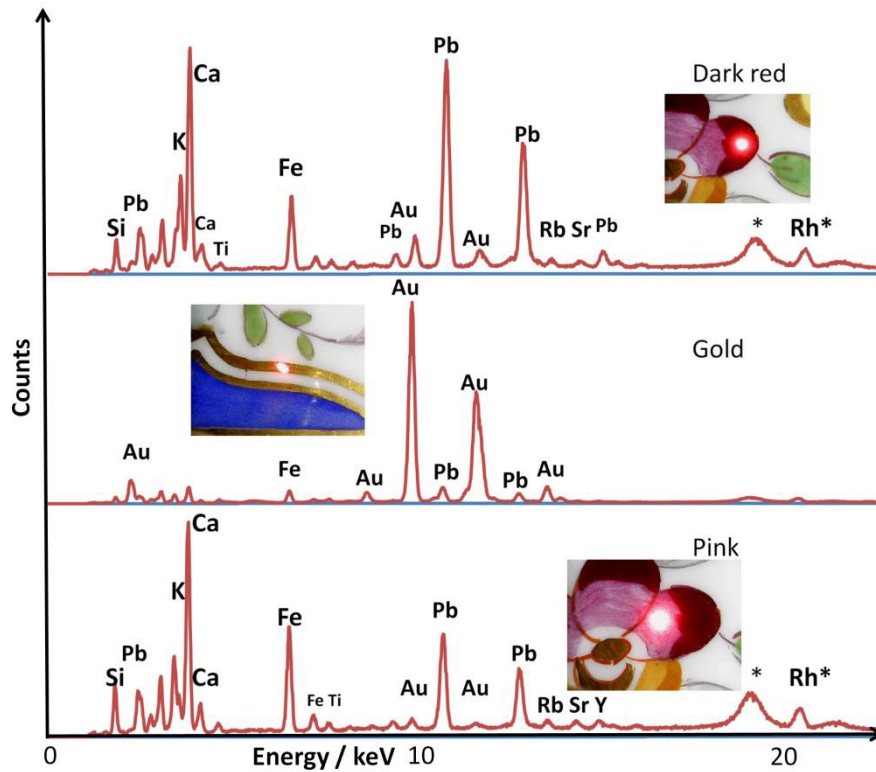

MNC 9638 ol

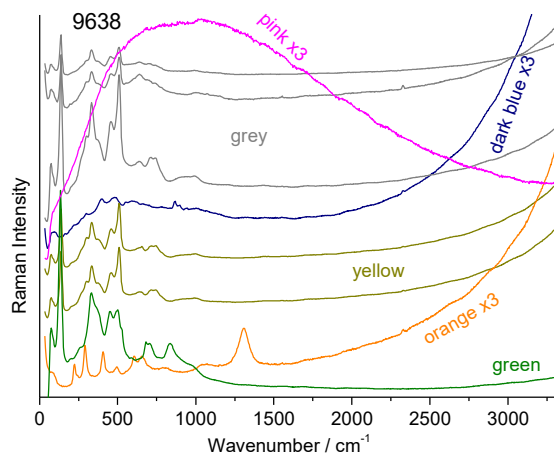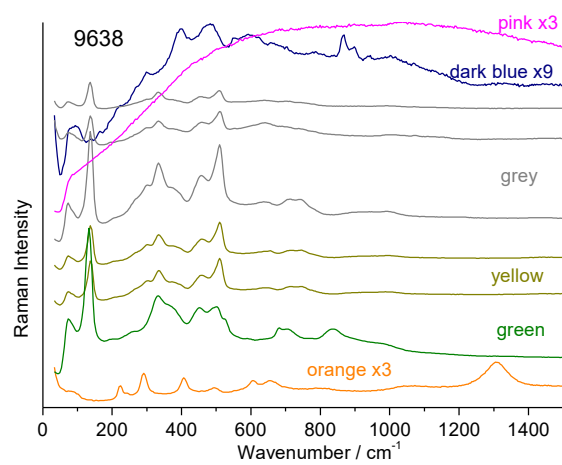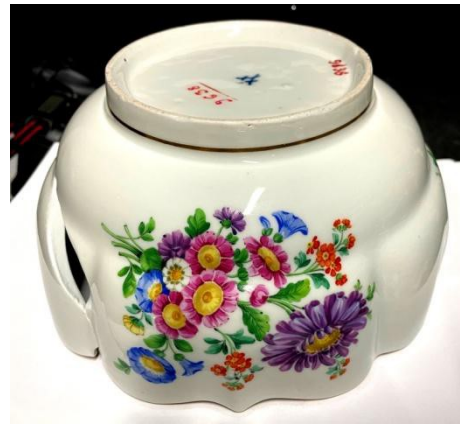

18th c.

21.8x21.8 H10.3

Acquisition in 1894 from Tamelier

MNC 469.9.1

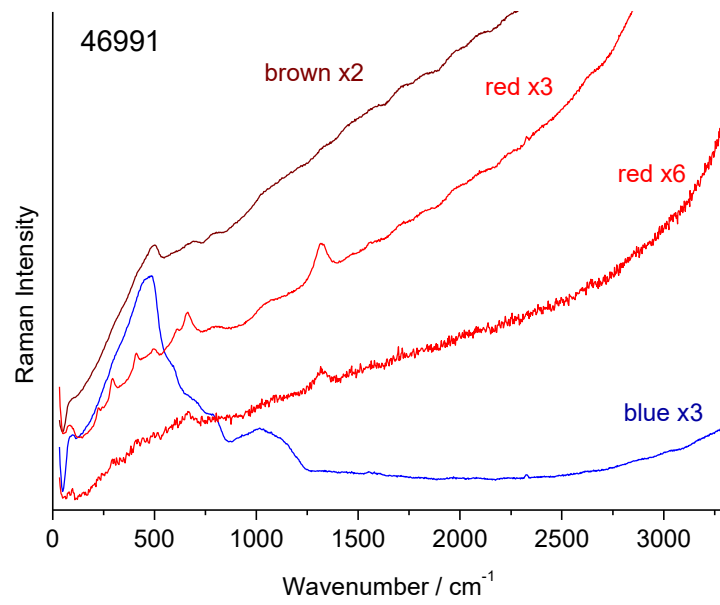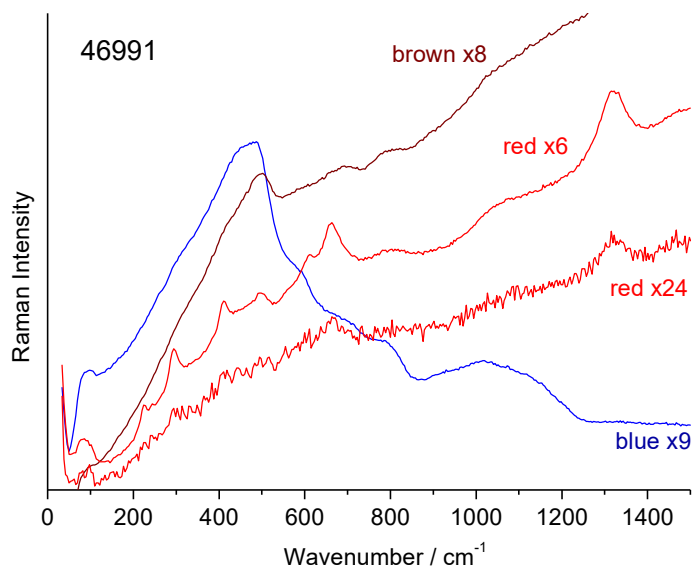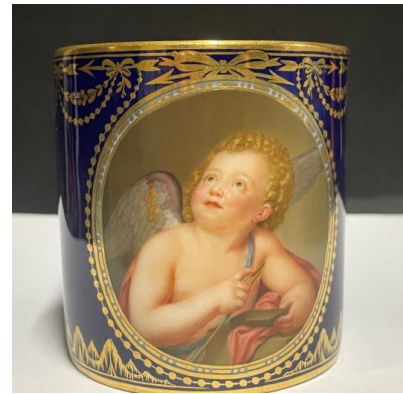

c.a. 1806  
9x6.7 h10.5  
coffee cup with painting copy  
(Marcolini period)

469.9.1 lue

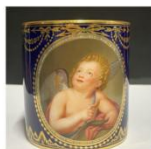

469.9.1 glaze

469.9.1 mark

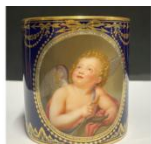

469.9.1 gold

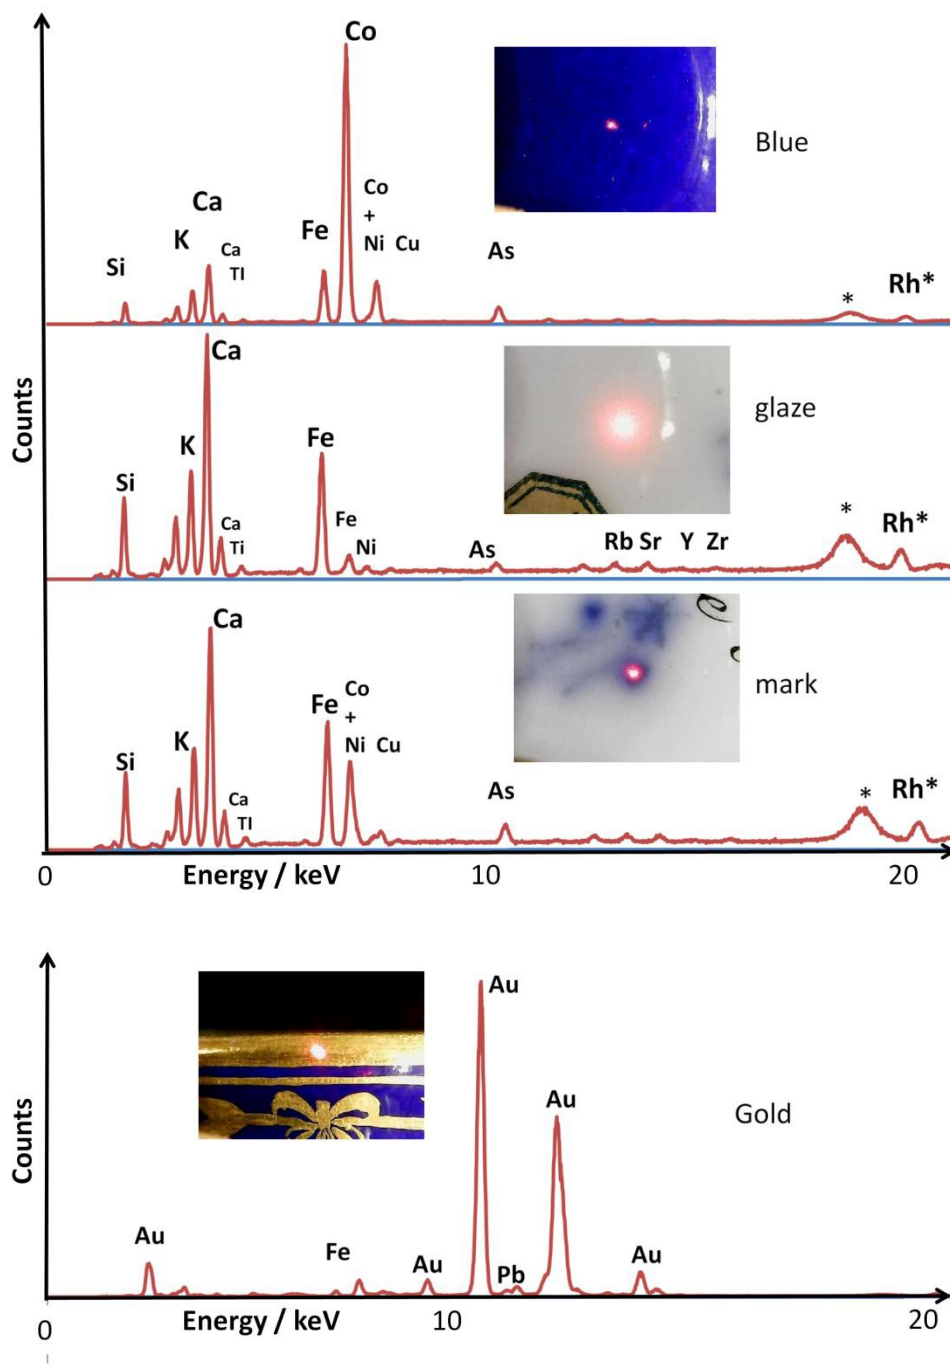

MNC 886.4.1

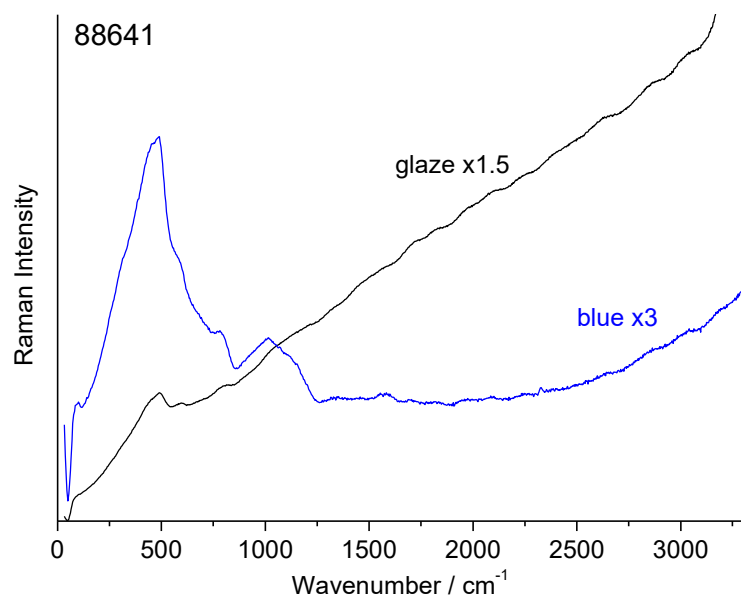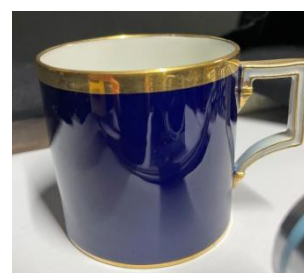

Tasse litron  
Coffee cup  
9x6.5 h6.5  
end of 18th c. -beginning  
of 19th c.

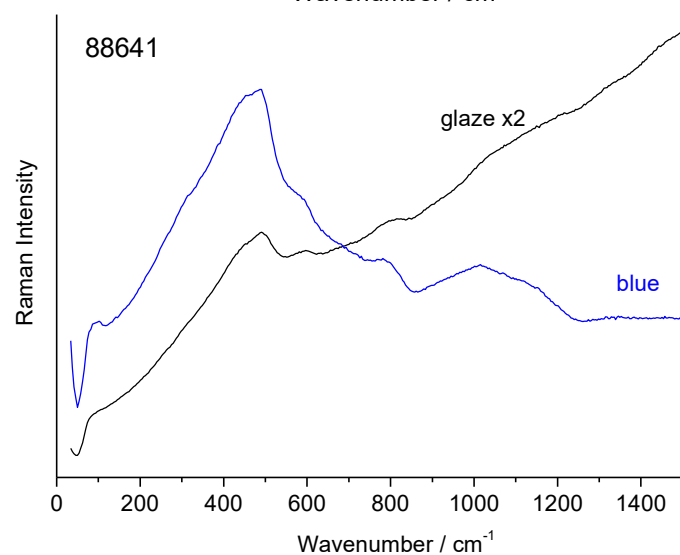

MNC 886.4.1  
(coffee cup)

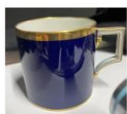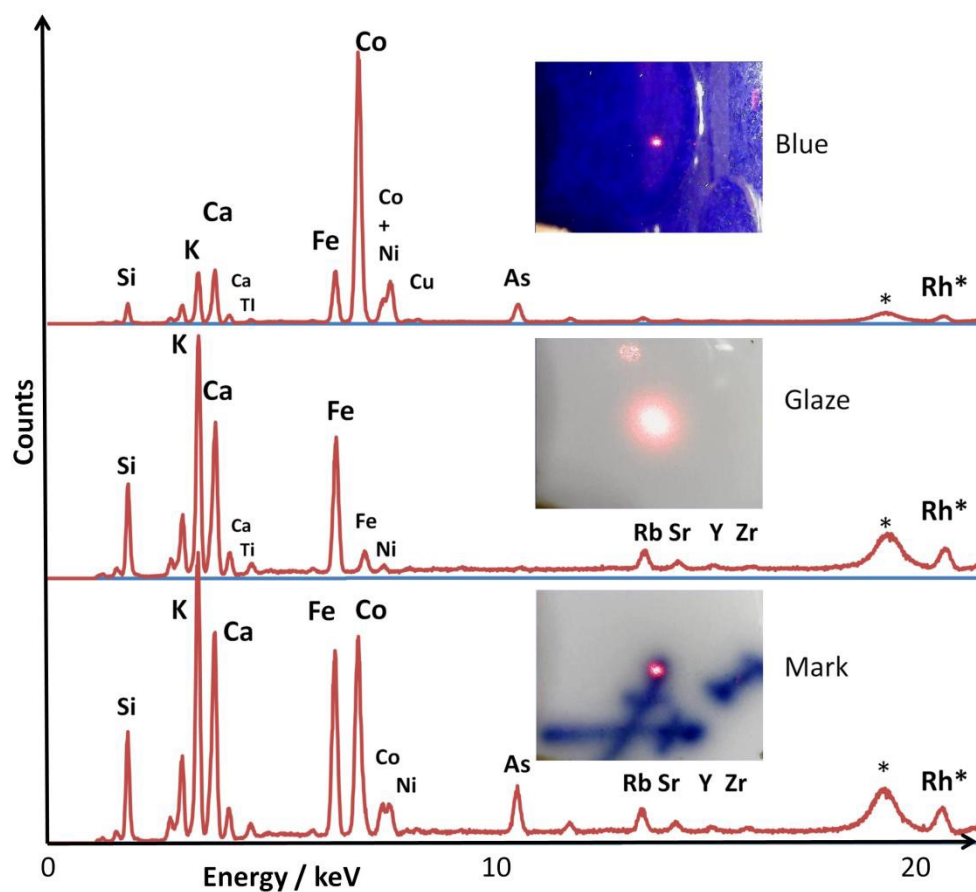

MNC 886.4.1  
(coffee cup)

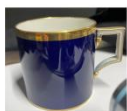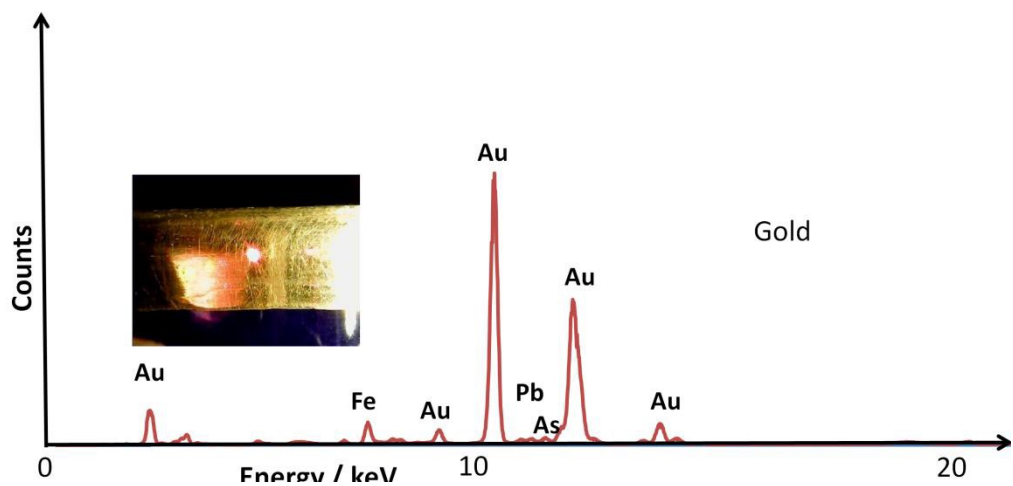





**Figure S3:** Diagrams of hierarchical similarity constructed with all the variables - or those indicated for areas indicated.

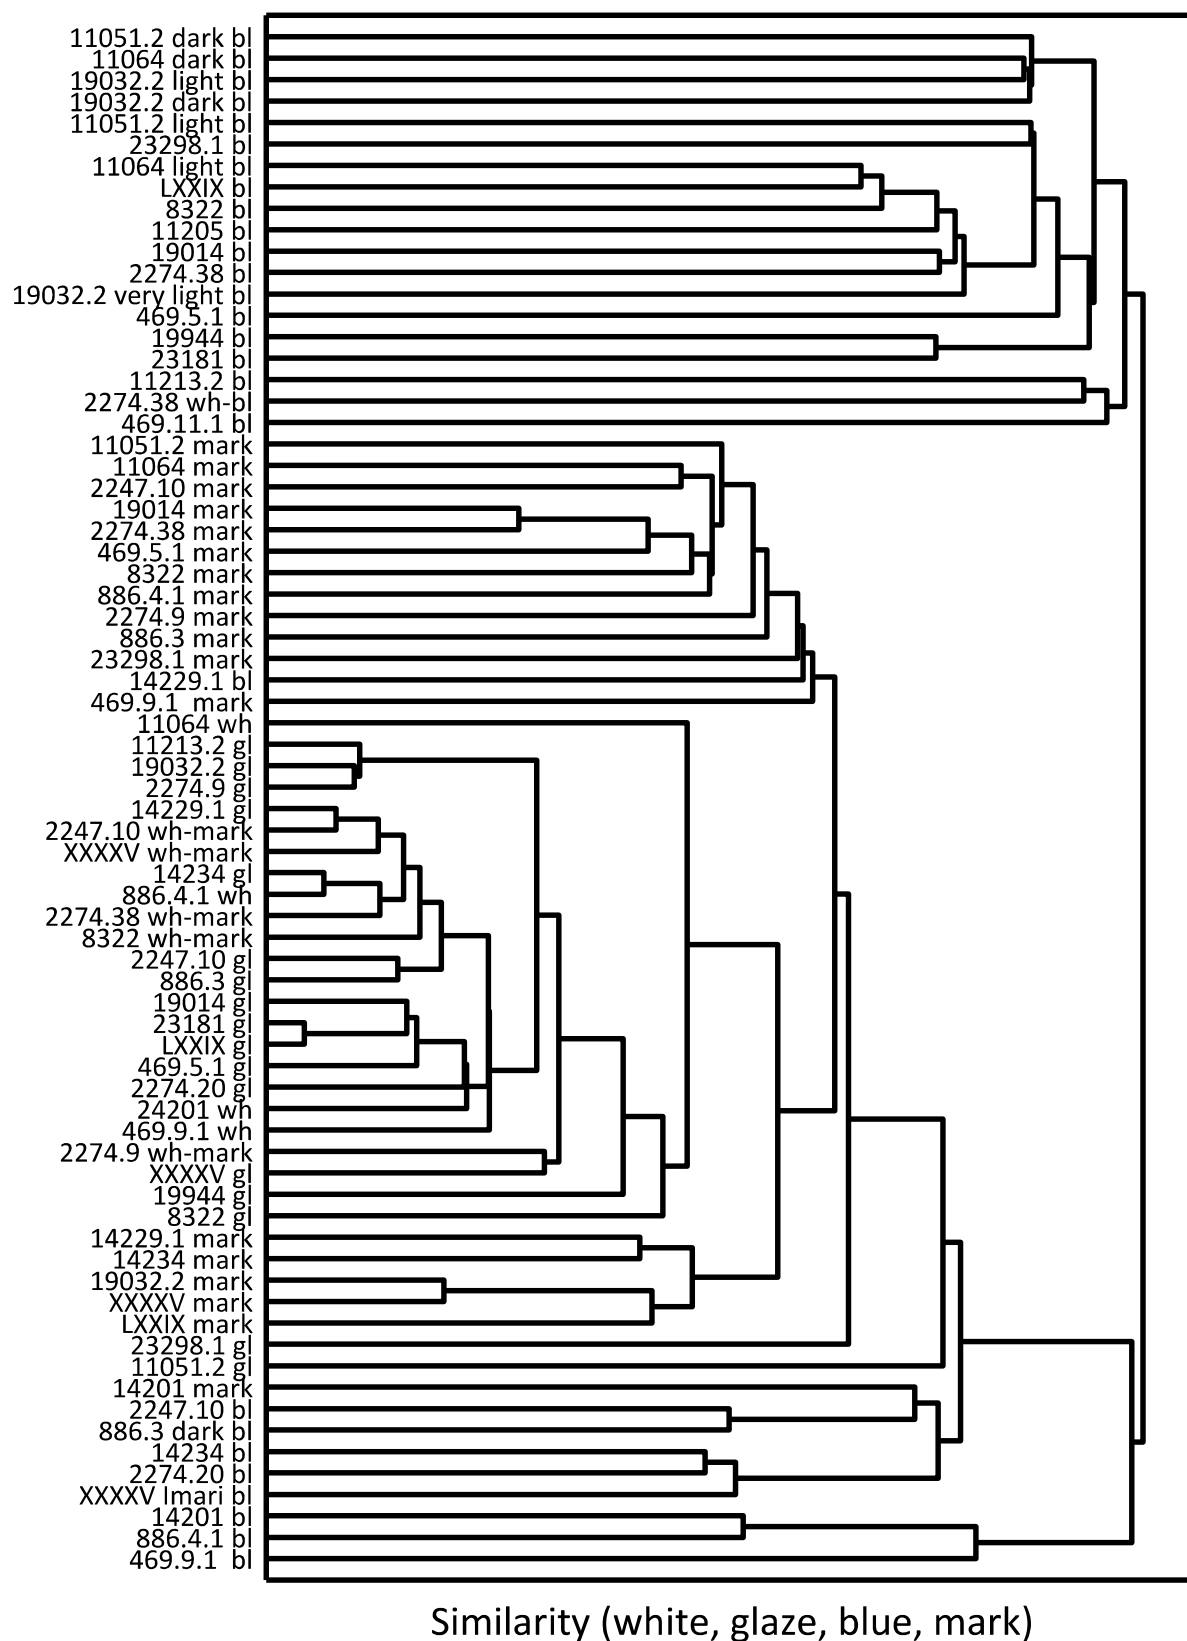

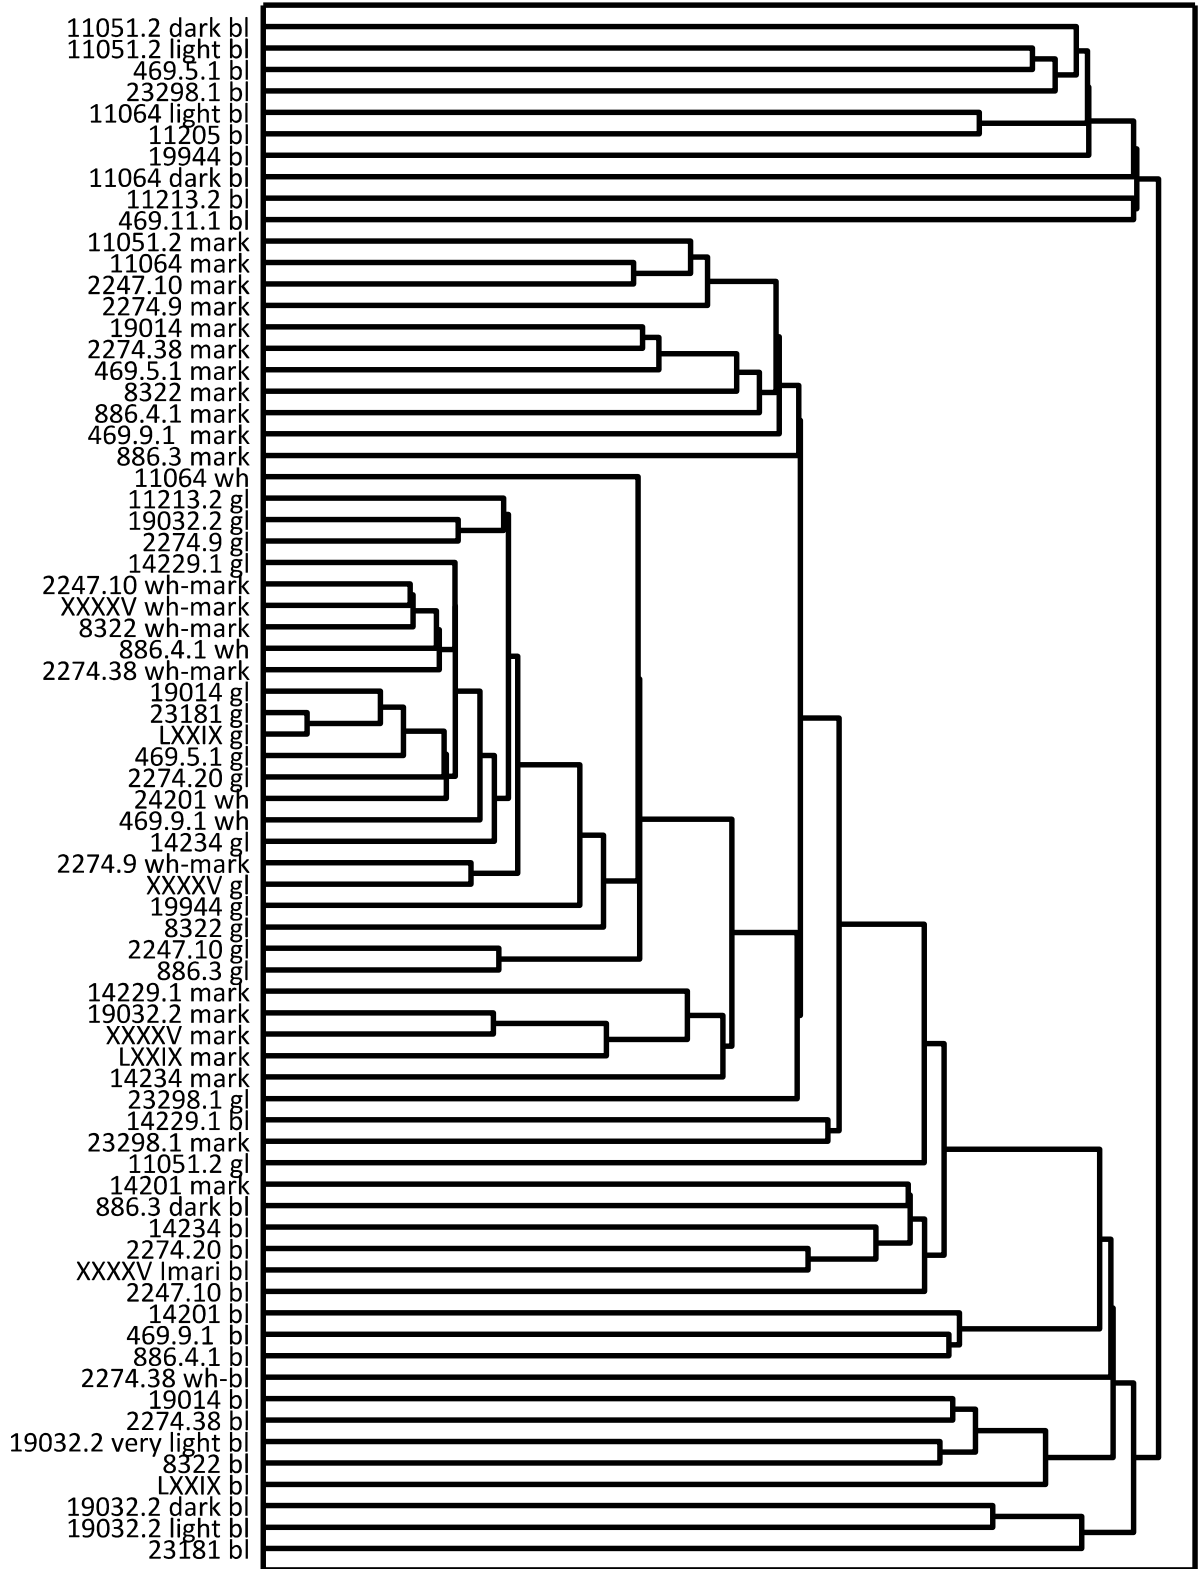

Similarity (white, glaze, blue, mark)

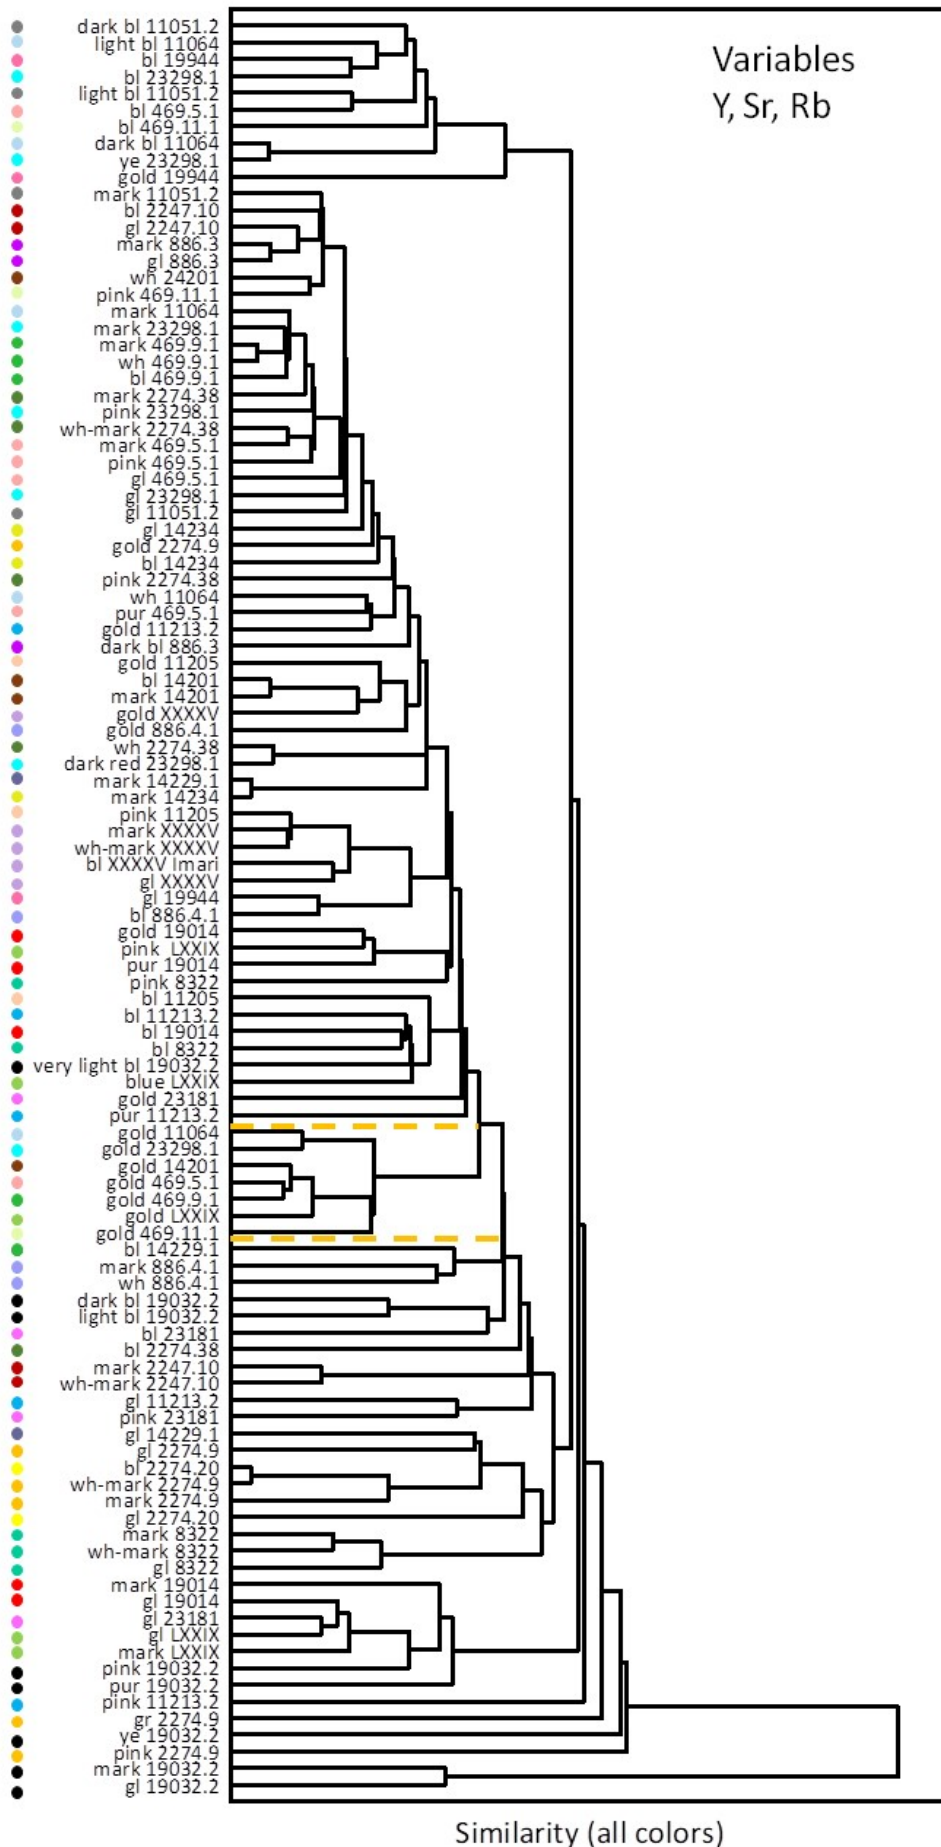

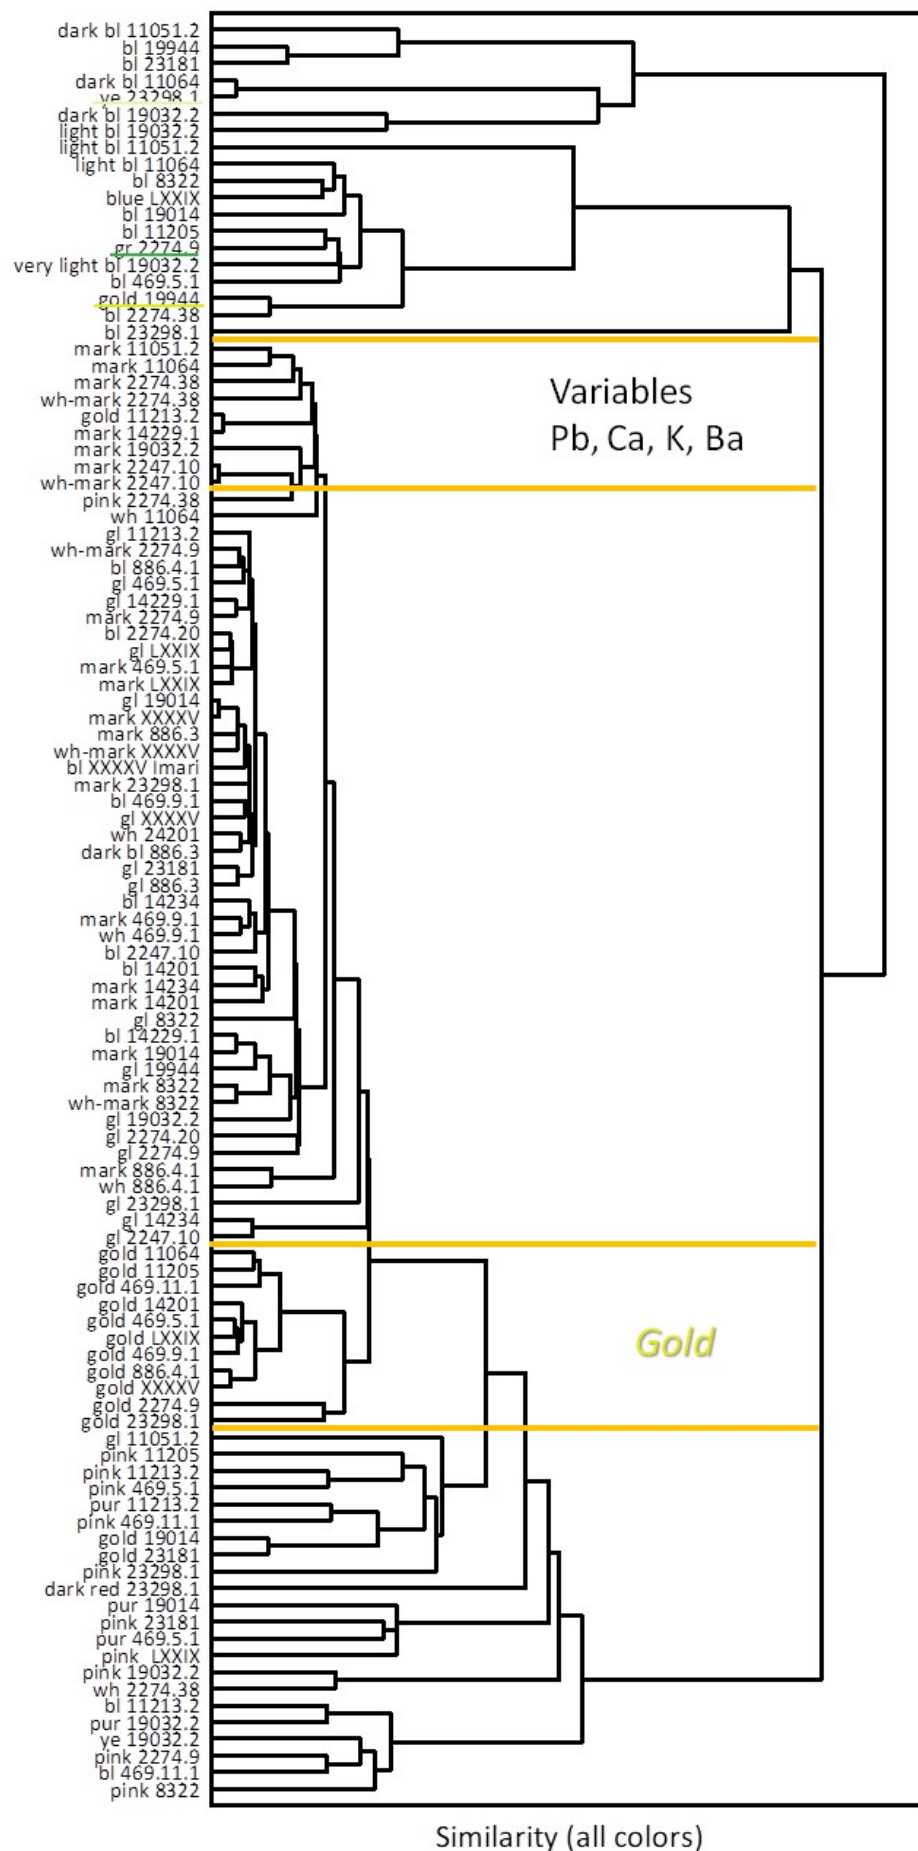

Blue

Variables  
Sn, Zn, As

Pink

Gold

Gold

Pink

Similarity (all colors)

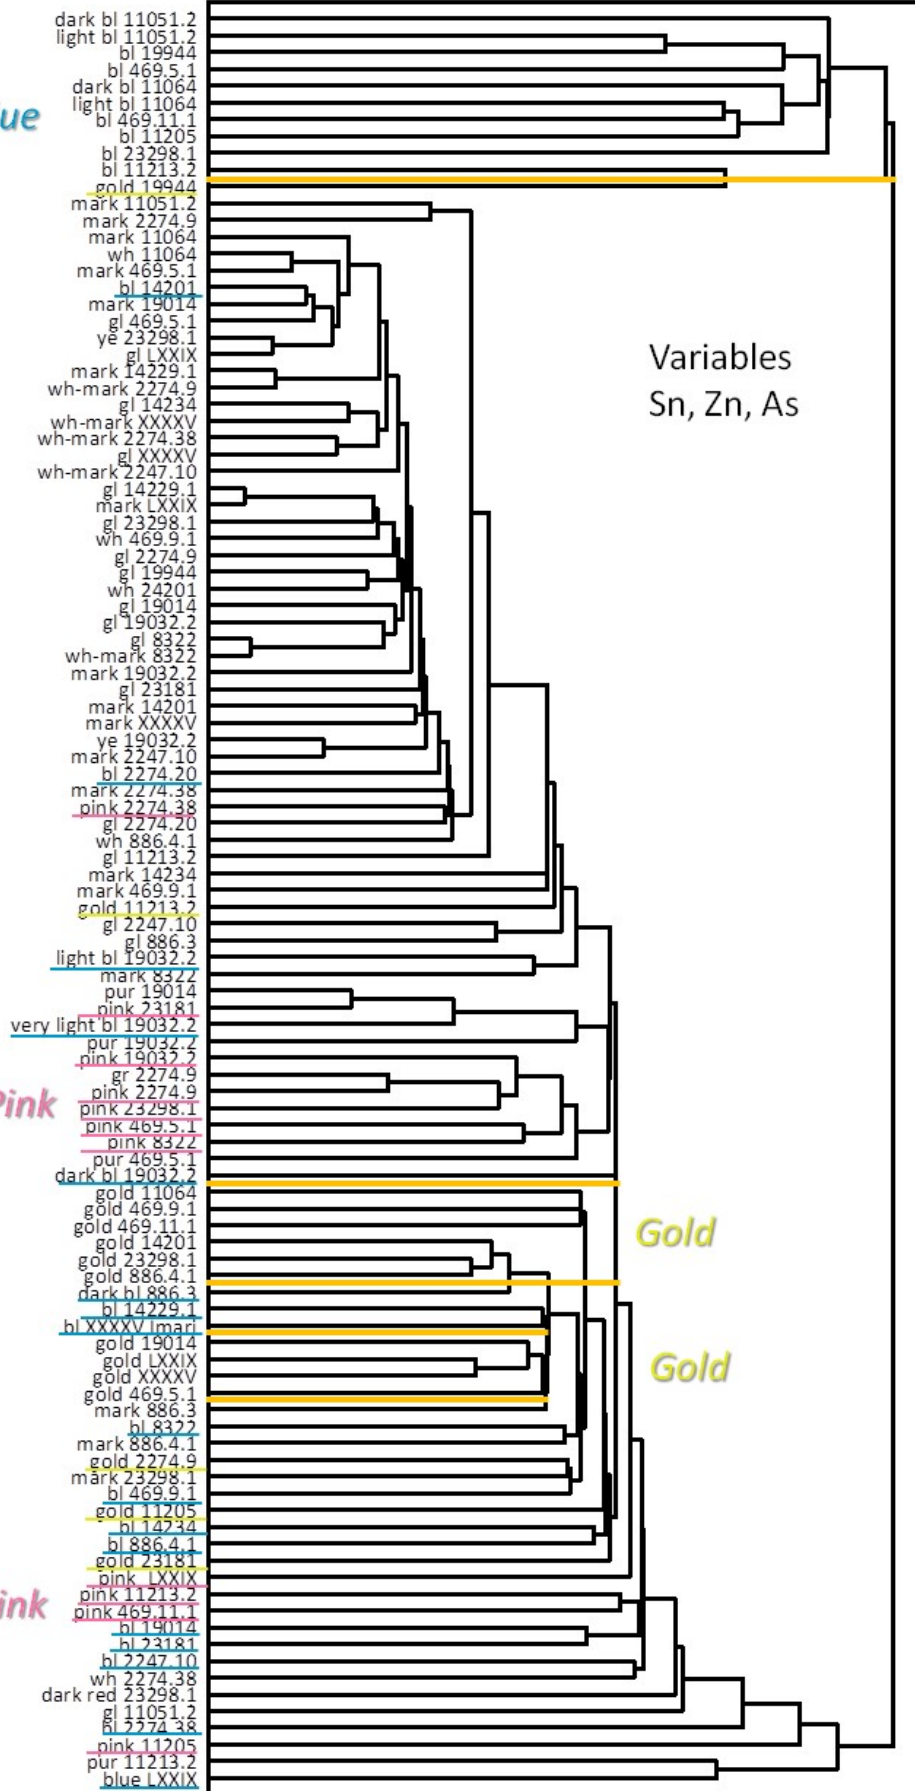

Supplement: s1 [file s1]
